# Supplementary material for: Mental burden and perception of the study situation among undergraduate students during the COVID-19 pandemic: a cross-sectional study and comparison of dental and medical students
Source: PubMed Central journal article supplement — BMJ Open. 2021 Nov 30;11(12):e054728. doi: 10.1136/bmjopen-2021-054728 (PMC8637311; doi:10.1136/bmjopen-2021-054728), 2021-11-30
Supplement: bmjopen-2021-054728.draft_revisions.pdf [file bmjopen-2021-054728.draft_revisions.pdf]

# BMJ Open

BMJ Open is committed to open peer review. As part of this commitment we make the peer review history of every article we publish publicly available.

When an article is published we post the peer reviewers' comments and the authors' responses online. We also post the versions of the paper that were used during peer review. These are the versions that the peer review comments apply to.

The versions of the paper that follow are the versions that were submitted during the peer review process. They are not the versions of record or the final published versions. They should not be cited or distributed as the published version of this manuscript.

BMJ Open is an open access journal and the full, final, typeset and author-corrected version of record of the manuscript is available on our site with no access controls, subscription charges or pay-per-view fees (<http://bmjopen.bmj.com>).

If you have any questions on BMJ Open's open peer review process please email [info.bmjopen@bmj.com](mailto:info.bmjopen@bmj.com)

# BMJ Open

## **Mental burden and perception of the study situation among undergraduate students during the COVID-19 pandemic: a cross-sectional study and comparison of dental and medical students**

|                               |                                                                                                                                                                                                                                                                                                                                                                                                    |
|-------------------------------|----------------------------------------------------------------------------------------------------------------------------------------------------------------------------------------------------------------------------------------------------------------------------------------------------------------------------------------------------------------------------------------------------|
| Journal:                      | <i>BMJ Open</i>                                                                                                                                                                                                                                                                                                                                                                                    |
| Manuscript ID                 | bmjopen-2021-054728                                                                                                                                                                                                                                                                                                                                                                                |
| Article Type:                 | Original research                                                                                                                                                                                                                                                                                                                                                                                  |
| Date Submitted by the Author: | 21-Jun-2021                                                                                                                                                                                                                                                                                                                                                                                        |
| Complete List of Authors:     | Guse, Jennifer; University Medical Center Hamburg-Eppendorf, Department of Medical Psychology<br>Weegen, Annabel ; University Medical Center Hamburg-Eppendorf, Department of Medical Psychology<br>Heinen, Ines; University Medical Center Hamburg-Eppendorf, Department of Medical Psychology<br>Bergelt, Corinna; University Medical Center Hamburg-Eppendorf, Department of Medical Psychology |
| Keywords:                     | MEDICAL EDUCATION & TRAINING, COVID-19, MENTAL HEALTH                                                                                                                                                                                                                                                                                                                                              |
|                               |                                                                                                                                                                                                                                                                                                                                                                                                    |

SCHOLARONE™  
Manuscripts

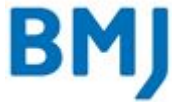

I, the Submitting Author has the right to grant and does grant on behalf of all authors of the Work (as defined in the below author licence), an exclusive licence and/or a non-exclusive licence for contributions from authors who are: i) UK Crown employees; ii) where BMJ has agreed a CC-BY licence shall apply, and/or iii) in accordance with the terms applicable for US Federal Government officers or employees acting as part of their official duties; on a worldwide, perpetual, irrevocable, royalty-free basis to BMJ Publishing Group Ltd ("BMJ") its licensees and where the relevant Journal is co-owned by BMJ to the co-owners of the Journal, to publish the Work in this journal and any other BMJ products and to exploit all rights, as set out in our [licence](#).

The Submitting Author accepts and understands that any supply made under these terms is made by BMJ to the Submitting Author unless you are acting as an employee on behalf of your employer or a postgraduate student of an affiliated institution which is paying any applicable article publishing charge ("APC") for Open Access articles. Where the Submitting Author wishes to make the Work available on an Open Access basis (and intends to pay the relevant APC), the terms of reuse of such Open Access shall be governed by a Creative Commons licence – details of these licences and which [Creative Commons](#) licence will apply to this Work are set out in our licence referred to above.

Other than as permitted in any relevant BMJ Author's Self Archiving Policies, I confirm this Work has not been accepted for publication elsewhere, is not being considered for publication elsewhere and does not duplicate material already published. I confirm all authors consent to publication of this Work and authorise the granting of this licence.

1  
2  
3 **Mental burden and perception of the study situation among undergraduate students during**  
4 **the COVID-19 pandemic: a cross-sectional study and comparison of dental and medical**  
5 **students**  
6  
7  
8  
9

10  
11 Jennifer Guse<sup>1</sup> (<https://orcid.org/0000-0001-5020-929X>), research assistant, Department of Medical  
12 Psychology, University Medical Center Hamburg-Eppendorf, Hamburg, Germany  
13

14  
15 Annabel Susan Weegen<sup>1</sup> (<https://orcid.org/0000-0001-5462-1775>), dental student, Department of  
16 Medical Psychology, University Medical Center Hamburg-Eppendorf, Hamburg, Germany  
17

18  
19 Ines Heinen (<https://orcid.org/0000-0001-7361-4554>), research assistant, Department of Medical  
20 Psychology, University Medical Center Hamburg-Eppendorf, Hamburg, Germany  
21

22  
23 Corinna Bergelt (<https://orcid.org/0000-0003-1413-1872>), associate professor, Department of  
24 Medical Psychology, University Medical Center Hamburg-Eppendorf, Hamburg, Germany  
25

26  
27  
28  
29 <sup>1</sup>Equal contributors  
30

31  
32  
33 Keywords: Dental students, medical students, COVID-19 pandemic, mental health, undergraduate  
34 medical education  
35  
36  
37  
38  
39  
40  
41  
42  
43

44 Corresponding author:

45 Dr. Jennifer Guse

46 University Medical Center Hamburg-Eppendorf

47 Center for Psychosocial Medicine

48 Department of Medical Psychology

49 Martinistraße 52, W26

50 20246 Hamburg

51 E-mail: [j.guse@uke.de](mailto:j.guse@uke.de)

52  
53  
54  
55  
56  
57  
58  
59  
60  
Word count: 3.423

## ABSTRACT

**Objectives:** To investigate levels of distress, depression, anxiety, stress and perception of their current study situation during the COVID-19 pandemic among undergraduate dental and medical students.

**Design:** Observational, cross-sectional study including two consecutive surveys (May and July 2020).

**Setting:** A large medical school in Germany.

**Participants:** All first year dental and medical students were invited. 132 participating first year students (44 dental, 88 medical) from the first survey and 150 students (50 dental, 100 medical) from the second were included in our analyses.

**Primary and secondary outcome measures:** Mental burden (Distress Thermometer, Patient Health Questionnaire PHQ-4, Perceived Stress Scale, PSS-4) and self-reported changes in mental health and perception of study situation during the COVID-19 pandemic (self-developed items) were compared. Open-ended questions were analyzed by conventional content analyses.

**Results:** A considerable proportion of students (May 2020: 84%; July 2020: 77%) reported distress levels above cutoff. In July 2020, dental students reported significantly higher distress scores than medical students. More dental than medical students reported mild, moderate and severe levels of anxiety and depression symptoms. The majority stated that their mental health and study motivation had not changed during the pandemic. Logistic regression showed that being a dental student and experiencing higher distress were significantly associated with a higher likelihood for serious worries. Regarding current concerns related to the pandemic, students most frequently reported difficulties with self-regulated learning (15%), study-related worries and uncertainty (14%), missing feedback of students and lecturers (11%) and lack of practical training (10%).

**Conclusion:** The results suggest that high mental burden and the lack of practical training among medical and dental students is an increasing problem, with a possibly even higher urgency in dental students. Tailored psychological and educational support offers during and after the COVID-19 pandemic might help them as they progress through (medical and) dental school.

### Strengths and limitations of this study

- This study offers in-depth exploration of students' mental health and perception of their study situation during the COVID-19 pandemic by combining quantitative data and qualitative data
- This study included well-established and valid instruments (quantitative data) and applied conventional content analyses with inductive categorization (qualitative data).
- Response rates of this study were high (65% - 87%).

- It is a single-institution study and the cross-sectional design does not allow causal statements about longitudinal developments.

## INTRODUCTION

The corona virus disease (COVID-19) pandemic and its consequences have an impact on the private, professional and social life of all people[1]. It has brought widespread disruption to undergraduate medical education[2, 3]. Thus medical students worldwide face major changes regarding their medical training and study motivation decreased[4]. Many medical schools have made changes to their curricula and campus life to protect patients and students by social distancing. Roles of medical students' during the COVID-19 pandemic are discussed controversial[5]. Even in the absence of the COVID-19 pandemic, mental burden is common among medical students[6, 7, 8] and several studies report lower mental health outcomes for medical students in the course of their medical studies compared to population reference samples[9]. In particular, depression and anxiety symptoms are reported among medical[7, 10] and dental students[11-13]. Often students feel that they do not have adequate coping strategies to deal with study-related workload and stress[14]. Dental students are highly stressed and perform at a comparable or higher stress level than medical students[15]. Studies have shown that the stress level increases with each semester, especially due to the high proportion of practical training in dental studies[13, 16].

In light of novel circumstances during the COVID-19 pandemic, uncertainty relating to personal and professional future and rapid changes medical students may be even more at risk of experiencing severe mental burden during the pandemic than before. Increased incidence rates of stress and mental burden are an expected response under the current conditions[17].

Studies have shown the negative impact of past pandemics[18] and the COVID-19 pandemic[19] on the general population, as well as on specific groups[20]. Health professionals may be particularly affected[21], as pandemic-specific stressors are added to the general ones[22]. High prevalence for mental health symptoms among health care workers exposed to COVID-19 was found[20]. Students are also highly burdened while facing new challenges raised by the pandemic's consequences[23, 24]. COVID-19 related mental stress, higher rates of depression and a high symptom burden from the acute stress response according to the COVID-19 pandemic are common especially among health care students[25], as they have to cope with mental and emotional issues, including stress and anxiety.

In contrast to the exposure of students in general during the COVID-19 pandemic, the mental burden of medical and dental students in particular is still poorly addressed in the international literature even though they are facing special challenges in health care[26].

1  
2  
3 Therefore, the aim of this study was to assess the magnitude of distress, depression and anxiety and  
4 stress among undergraduate dental and medical students in the course of the COVID-19 pandemic.  
5 Secondly, we aimed to explore students' perception of the study situation during the pandemic and  
6 compare dental and medical students' perception during the first lockdown period and thereafter.  
7  
8  
9

## 10 11 12 **METHODS**

### 13 14 **Design and setting**

15  
16 This observational study consists of two cross-sectional surveys conducted at the University Medical  
17 Center Hamburg-Eppendorf, Germany, from May 28, 2020 to June 7 (t1), 2020 and from July 16, 2020  
18 to July 31, 2020 (t2). During this period and before (since mid-March 2020) the German government  
19 announced several public health measures to suppress the spread of COVID-19 by increasing social  
20 distancing, i.e. the closure of schools, daycare, playgrounds and non-essential shops, the prohibition  
21 to meet more than one person from another household and depending on regional regulations the  
22 prohibition to leave the apartment without reason[27]. Concurrently lectures and seminars at the  
23 universities were predominantly held in a digital format to reduce interpersonal contact and to protect  
24 patients, students and faculty[28]. Thus, the learning environment and examination conditions for  
25 students have changed significantly. Many medical schools have discontinued their undergraduate  
26 medical training and transitioned most of their teaching to digital formats[29]. This included but was  
27 not limited to the transformation of Objective Structured Clinical Examinations (OSCE[30]) into  
28 Multiple Choice tests.  
29  
30  
31  
32  
33  
34  
35  
36  
37  
38  
39  
40

### 41 **Participants**

42  
43 All first year dental students (n=68) enrolled in the integrated dental degree program iMED DENT  
44 launched in 2019 and medical students (n=352) enrolled in the integrated medical degree program  
45 iMED established in 2012 at the Medical School of the University of Hamburg, Germany[31] were  
46 invited to participate in the online surveys. Students were asked to complete an anonymous  
47 questionnaire linked to the voluntary curriculum evaluation conducted by the dean's office in regular  
48 intervals during the course of the year. A few days in advance the students were informed via e-mail  
49 of the study aims, voluntary participation and data protection regulations.  
50  
51  
52  
53  
54  
55  
56  
57

### 58 **Measures**

1  
2  
3 We developed an online questionnaire and focused on symptoms of distress, depression and anxiety  
4 and stress by using established self-reporting questionnaires. Furthermore, we assessed the  
5 perception of the study situation during the pandemic and study motivation with self-developed items.  
6  
7 Demographic characteristics (age in categories, gender) were also self-reported.  
8  
9

## 10 11 12 Distress

13  
14 We assessed students' distress at t1 (May 2020) and t2 (July 2020) using the German version of the  
15 Distress-Thermometer (DT), a brief screening instrument developed by the National Comprehensive  
16 Cancer Network (NCCN)[32]. The DT is a single-item instrument with a scale from 0-10. Higher scores  
17 indicate higher distress. Internationally a cutoff score of 4 is established as a signal that a person is  
18 distressed and needs support. The DT is a reliable and efficient screening instrument[32].  
19  
20  
21  
22  
23  
24  
25

## 26 Depression and anxiety

27  
28 We measured depression and anxiety using the German version of the four-item Patient Health  
29 Questionnaire (PHQ-4), an ultra-brief screening instrument that consists of a two-item depression  
30 scale (PHQ-2) and a two-item anxiety scale (GAD-2)[33]. It assesses the amount of depression and  
31 anxiety symptoms the individual has felt during the past two weeks. A score of 3 or higher on the  
32 PHQ-2 and GAD-2 is established as a reasonable cut-off score clinically relevant levels of depressive  
33 and anxiety symptoms. The total PHQ-4 score is considered as an overall measure of symptom burden  
34 with the following categories: 0-2 normal, 3-5 mild, 6-8 moderate, 9-12 severe. It is an efficient  
35 screening instrument with good internal consistency and construct validity and areas under the curve  
36 between 0.84 (anxiety) and 0.79 (depression) among students[34].  
37  
38  
39  
40  
41  
42  
43  
44  
45

## 46 Changes in mental health and perception of study situation during the COVID-19 pandemic

47  
48 Furthermore we administered five self-developed items to assess changes in students' mental health  
49 and perception of the study situation: Students were asked whether their mental health has changed  
50 since the beginning of the pandemic with five answer options (clearly improved; rather improved;  
51 unchanged; rather worsened; clearly worsened). They were asked if the assessment of their study  
52 situation has changed in the context of the pandemic with three answer options (No, I am as worried  
53 or unworried as before; Yes, I am somewhat worried; Yes, I am seriously worried). Furthermore  
54 students were asked if the pandemic affected their possibility to participate in exams with five options  
55 to answer (No exams took place since the beginning of the pandemic; Exams took place without  
56 changes; Exams did not take place, but a new date is scheduled; Exams did not take place and no new  
57  
58  
59  
60



1  
2  
3 date is scheduled yet; I was not able to attend exams due to quarantine or illness). Students were  
4 asked if their study motivation had changed since the beginning of the pandemic. Answers were rated  
5 on a 5-point Likert-type scale (clearly increased; rather increased; unchanged; rather decreased; clearly  
6 decreased). Finally, students were asked for free text responses regarding the question what currently  
7 is occupying them most in their current study situation and what they experience as particularly  
8 helpful.  
9  
10  
11  
12

### 13 14 15 16 Stress

17  
18 In the second survey students' perception of stress was quantified with the Perceived Stress Scale (PSS-  
19 4). The 4-item self-report instrument with reverse coding for two items assesses on a five-point Likert  
20 scale the degree to which situations in one's life were perceived as stressful in the past month[35].  
21 Higher scores on the PSS-4 indicate higher stress levels.  
22  
23  
24  
25  
26  
27

### 28 Burdening aspects

29  
30 For the second data collection in July 2020, we developed six items based on the qualitative results  
31 from the first survey to assess burdening aspects experienced by the students' quantitatively. The  
32 respondents had the possibility to answer in four levels (1 = "not at all burdensome" to 4 = "very  
33 burdensome").  
34  
35  
36  
37  
38  
39

### 40 Data analysis

41  
42 We matched dental students to medical students according to age and gender in the ratio of 1:2 in  
43 order to harmonize the initially inhomogeneous sample sizes and enhance comparability of the  
44 samples. In May 2020, the final sample consisted of n=132 students (44 dental and 88 medical  
45 students). In July 2020, the sample comprised 150 students (50 dental and 100 medical students). With  
46 74% (t1) and 69% (t2) female students the gender ratio of the sample is comparable to the ratio of first  
47 year students at German medical schools[36]. We used descriptive statistics to characterize the  
48 sample. Group comparisons were carried out using chi<sup>2</sup>-tests for categorical variables and t-tests for  
49 differences of means.  
50  
51  
52  
53  
54  
55

56 We conducted descriptive analyses to examine the magnitude of distress (DT), depression and anxiety  
57 (PHQ-4), and stress (PSS-4). The results of the entire sample as well as of the subgroups (dental and  
58 medical students) were compared with PHQ-4 data of a German medical student sample (n=321, mean  
59 age=22 years, 60% women) from a previous study at the same faculty[8] with one-sample t-tests. To  
60

1  
2  
3 examine the likelihood for serious worries (dichotomous) regarding the study situation during the  
4 COVID-19 pandemic at t1 we conducted a binary logistic regression model with sex, subject of study,  
5 the magnitude of distress, depression and anxiety as potential predictors. Non-significant variables  
6 were excluded via backward elimination and dropped at the level of  $p < 0.05$ . We applied likelihood  
7 ratio method, which is recommended for stepwise methods[37]. To avoid multicollinearity, we  
8 analyzed Variable Inflation Factors (VIF) scores. We conducted effect size calculations and considered  
9 according to Cohen's  $f^2 = .02$  to be a small effect,  $f^2 = .15$  as a medium effect, and  $f^2 = .35$  as a large  
10 effect[38]. All quantitative analyses were carried out using IBM SPSS version 27.

11  
12 We used conventional content analyses with inductive categorization to analyze the free text  
13 responses[39]. Two researchers familiarized themselves with the qualitative data (IH, JG). They  
14 identified key concepts and generated labels of codes for recurring themes independently. Next, both  
15 sorted codes into categories independently, which were reviewed by all authors. We developed final  
16 definitions for categories and codes with iterative consultations and discussions until consensus was  
17 achieved. We chose excerpts to exemplify each category and translated them into English. For the  
18 qualitative data analysis, we used MAXQDA 2020 (VERBI Software, 2019).

19  
20 Following the inductive categorization we recoded answers for each category into dichotomous  
21 variables (mentioned vs. not mentioned) to enhance data transparency and to provide evidence for  
22 our interpretation[40]. When students provided more than one category per response, all responses  
23 respectively categories were categorized. The qualitative results of the first survey served as the basis  
24 for developing six quantitative items for the second survey.

25  
26 The local ethics board of the Center for Psychosocial Medicine at the University Medical Center  
27 Hamburg-Eppendorf approved the study (LPEK-0161).

#### 28 29 30 31 32 33 34 35 36 37 38 39 40 41 42 43 44 Patient and Public Involvement

45  
46 We did not involve patients in our study. Research questions were developed by the principle  
47 investigators (CB, JG) and discussed with the Curriculumkomitee iMED, Hamburg (CK iMED) in April  
48 2020. CK iMED is a committee consisting of students, teachers and a member of the dean's office,  
49 which has the task of further developing and optimizing the structure and content of the reformed  
50 medical degree program iMED. Subsequently all enrolled students were informed by e-mail about the  
51 design, conduct, the outcome measures and the recruitment and encouraged to give feedback. After  
52 publication a summary of the results will be presented in plain language on the website of the  
53 University Medical Center Hamburg-Eppendorf.

## RESULTS

Of 68 first year dental students enrolled in the dental education program at the UKE in May 2020, 44 (65%) completed the first survey (t1) in May 2020 and were matched to 88 medical first year students who completed the t1 survey as described above (overall response rate of the medical students was 87%). The response rate of the second survey (t2) was 81% among first year dental students and 82% among first year medical students. With 75% (t1) and 70% (t2) female dental students and 40% (t1 and t2) aged 20 years and younger, both samples are similar to the population of first year dental students at the faculty. The demographic characteristics of the final samples are shown in Table1.

**Table 1:** Sample characteristics among dental and medical students participating in the first (n<sup>1</sup>=132) and second survey (n<sup>2</sup>=150)

|                     | First Survey (May 2020) |                                      |                                       | Second Survey (July 2020) |                                      |                                        |
|---------------------|-------------------------|--------------------------------------|---------------------------------------|---------------------------|--------------------------------------|----------------------------------------|
|                     | Whole sample (n=132)    | Dental students (n <sub>1</sub> =44) | Medical students (n <sub>1</sub> =88) | Whole sample (n=150)      | Dental students (n <sub>2</sub> =50) | Medical students (n <sub>2</sub> =100) |
|                     | %                       | %                                    | %                                     | %                         | %                                    | %                                      |
| <b>sex:</b>         |                         |                                      |                                       |                           |                                      |                                        |
| male                | 28.8                    | 25.0                                 | 26.1                                  | 30.7                      | 30.0                                 | 31.0                                   |
| female              | 74.2                    | 75.0                                 | 73.9                                  | 69.3                      | 70.0                                 | 69.0                                   |
| <b>age:</b>         |                         |                                      |                                       |                           |                                      |                                        |
| Up to 20 years      | 38.6                    | 39.7                                 | 38.6                                  | 40.0                      | 40.0                                 | 40.0                                   |
| 21-25 years         | 34.1                    | 33.8                                 | 34.1                                  | 34.0                      | 34.0                                 | 34.0                                   |
| 26-30 years         | 18.2                    | 17.6                                 | 18.2                                  | 18.0                      | 18.0                                 | 18.0                                   |
| 31-35 years         | 6.8                     | 5.9                                  | 6.8                                   | 6.0                       | 6.0                                  | 6.0                                    |
| Older than 35 years | (2.5                    | 2.9                                  | 2.3                                   | 2.0                       | 2.0                                  | 2.0                                    |

### Distress, depression and anxiety

Overall, high levels of distress, anxiety and depression were found in both dental and medical students. Compared to a German reference sample [41] with an overall mean PHQ-4 score of 1.76 (SD=2.02) and of 1.48 (2.00) for a student subsample, our samples reported on average significantly higher anxiety and depression (PHQ-4) scores at t1 and t2: In May 2020 80% of the dental students and 86% of the medical students reported moderate or severe distress scores and 25% of the dental students and 24% of the medical students reported moderate to severe anxiety and depression scores. In July 2020 dental students reported significantly higher levels of distress and anxiety than medical students (Table 2). With regard to gender differences, the scores of male and female students did overall not differ significantly in the whole sample at t1 and t2. However, female dental students (t1: M=4.67; SD=2.58; t2: M=4.6; SD=2.76) reported significantly higher PHQ-4 scores than male dental students (t1: M=2.82; SD= 1.54; t2: M=2.87; SD= 2.56) at t1 (t(42)= -2.235, p=.031) and t2 (t(48)= -2.080, p= .043).

1  
2  
3 In July 2020 (t2), dental students reported significantly higher scores of distress and anxiety than  
4 medical students, while both groups were comparable with regard to their overall anxiety and  
5 depression symptom burden (24% with moderate or severe symptoms in dental students, 19% in  
6 medical students). With regard to self-perceived stress (only assessed in the second survey), dental  
7 students reported higher stress levels than medical students (Table 2).  
8  
9  
10  
11  
12  
13  
14  
15  
16  
17  
18  
19  
20  
21  
22  
23  
24  
25  
26  
27  
28  
29  
30  
31  
32  
33  
34  
35  
36  
37  
38  
39  
40  
41  
42  
43  
44  
45  
46  
47  
48  
49  
50  
51  
52  
53  
54  
55  
56  
57  
58  
59  
60

**Table 2:** Amount of self-reported distress, depression and anxiety and stress among dental and medical students in May 2020 (n<sup>1</sup>=132) and July 2020 (n<sup>2</sup>=150)

|                                                   | May 2020       |                        |                         |                  |     |      | July 2020      |                        |                          |                  |     |       |
|---------------------------------------------------|----------------|------------------------|-------------------------|------------------|-----|------|----------------|------------------------|--------------------------|------------------|-----|-------|
|                                                   | Whole sample   | Dental students (n=44) | Medical students (n=88) | t                | df  | p    | Whole sample   | Dental students (n=50) | Medical students (n=100) | t                | df  | p     |
|                                                   | M (SD)         | M (SD)                 | M (SD)                  |                  |     |      | M (SD)         | M (SD)                 | M (SD)                   |                  |     |       |
| <b>Distress (range: 0-10)</b>                     | 6.41<br>(2.38) | 6.32<br>(2.45)         | 6.45<br>(2.35)          | .310             | 130 | .757 | 6.14<br>(2.22) | 7.02<br>(2.25)         | 5.70<br>(2.07)           | -3.571           | 148 | <.001 |
| <b>Anxiety and depression (PHQ-4; range 0-12)</b> | 3.95<br>(2.49) | 4.20<br>(2.48)         | 3.83<br>(2.50)          | 0.815            | 130 | .417 | 3.73<br>(2.67) | 4.08<br>(2.79)         | 3.56<br>(2.60)           | 1.126            | 148 | .262  |
| <b>Anxiety (GAD-2; range 0-6)</b>                 | 1.95<br>(1.49) | 2.09<br>(1.51)         | 1.88<br>(1.48)          | 0.785            | 130 | .435 | 1.91<br>(1.58) | 2.28<br>(1.81)         | 1.73<br>(1.43)           | 2.025            | 148 | .045  |
| <b>Depression (PHQ-2; range 0-6)</b>              | 2.01<br>(1.31) | 2.11<br>(1.28)         | 1.95<br>(1.33)          | 0.656            | 130 | .513 | 1.82<br>(1.35) | 1.80<br>(1.31)         | 1.83<br>(1.37)           | -.128            | 148 | .898  |
| <b>Self-perceived Stress (PSS-4; range 0-16)</b>  | -              | -                      | -                       | -                | -   | -    | 5.60<br>(3.07) | 6.14<br>(3.22)         | 5.33<br>(2.96)           | 1.533            | 148 | .128  |
| <b>Anxiety and depression symptoms (PHQ4)</b>     | %              | %                      | %                       | chi <sup>2</sup> | df  | p    | %              | %                      | %                        | chi <sup>2</sup> | df  | p     |
| <b>normal (0-2)</b>                               | 31.8           | 25.0                   | 35.2                    | 1.535            | 3   | .674 | 38.0           | 36.0                   | 39.0                     | 0.557            | 3   | .906  |
| <b>mild (3-5)</b>                                 | 43.9           | 50.0                   | 40.9                    |                  |     |      | 41.3           | 40.0                   | 42.0                     |                  |     |       |
| <b>moderate (6-8)</b>                             | 19.7           | 20.5                   | 19.3                    |                  |     |      | 13.3           | 16.0                   | 12.0                     |                  |     |       |
| <b>severe (9-12)</b>                              | 4.5            | 4.5                    | 4.5                     |                  |     |      | 7.3            | 8.0                    | 7.0                      |                  |     |       |
| <b>Distress by category</b>                       | %              | %                      | %                       | chi <sup>2</sup> | df  | p    | %              | %                      | %                        | chi <sup>2</sup> | df  | p     |
| <b>Normal (0-4)</b>                               | 14.9           | 20.5                   | 13.6                    | 1.022            | 2   | .600 | 22.7           | 16.0                   | 26.0                     | 9.652            | 2   | .008  |
| <b>Moderate (5-7)</b>                             | 50.8           | 47.7                   | 52.3                    |                  |     |      | 49.3           | 40.0                   | 54.0                     |                  |     |       |
| <b>Severe (8-10)</b>                              | 33.3           | 31.8                   | 34.1                    |                  |     |      | 28.0           | 44.0                   | 20.0                     |                  |     |       |
| <b>Over cutoff (≥5)</b>                           | 84.1           | 79.5                   | 86.4                    | 1.019            | 1   | .313 | 77.3           | 84.0                   | 74.0                     | 1.902            | 1   | .168  |

Note. n=number; M = mean; SD = standard deviation; df = degrees of freedom; p = p-value, significance level p<.05

### Changes in mental health and perception of the study situation

Overall, about one third of the students (36% dental students vs. 30% medical students) reported that their mental health had worsened because of the pandemic at t1. Likewise, a total of 36% (46% dental vs. 31% medical students) reported a decrease in their study motivation at t1 and 37% at t2 (36% dental vs. 37% medical students). With regard to worries about the current study situation more medical students (t1 46%; t2 48%) than dental students (t1 32%; t2 35%) reported to be unperturbed and slightly more dental than medical students were seriously worried at t1 (18% vs. 6%) and at t2 (14% vs. 10%). However, in both surveys dental and medical students did not differ significantly regarding their self-reported changes of mental health, study motivation or worries about the current study situation (Table 3). Likewise, we did not find significant differences between male and female students (data not shown).

**Table 3:** Perception of current study situation, changes of self-reported mental health caused by the COVID-19 pandemic and changes of study motivation of dental and medical students in May 2020 (n<sup>1</sup>=132) and July 2020 (n<sup>2</sup>=150)

| May 2020                                                                                |              |                        |                            |                  |    |      | July 2020           |                                        |                                          |                        |           |             |
|-----------------------------------------------------------------------------------------|--------------|------------------------|----------------------------|------------------|----|------|---------------------|----------------------------------------|------------------------------------------|------------------------|-----------|-------------|
| Worries about current study situation                                                   | Whole sample | Dental students (n=44) | Medical students (84<n>88) | chi <sup>2</sup> | df | p    | Whole sample        | Dental students (49<n>50)              | Medical students (99<n>100)              | chi <sup>2</sup>       | df        | p           |
|                                                                                         | %            | %                      | %                          |                  |    |      | %                   | %                                      | %                                        |                        |           |             |
| Not worried                                                                             | 40.2         | 31.8                   | 46.4                       | 5.774            | 2  | .056 | 42.7                | 34.7                                   | 47.5                                     | 2.273                  | 2         | .321        |
| Somewhat worried                                                                        | 47.0         | 50.0                   | 47.6                       |                  |    |      | 44.7                | 51.0                                   | 42.4                                     |                        |           |             |
| Seriously worried                                                                       | 9.8          | 18.2                   | 6.0                        |                  |    |      | 11.3                | 14.3                                   | 10.1                                     |                        |           |             |
| <b>Self-reported changes of mental health caused by the COVID-19 pandemic</b>           |              |                        |                            |                  |    |      |                     |                                        |                                          |                        |           |             |
| improved                                                                                | 19.7         | 22.7                   | 18.2                       | 1.518            | 2  | .468 | Not asked.          |                                        |                                          |                        |           |             |
| unchanged                                                                               | 48.5         | 40.9                   | 52.3                       |                  |    |      |                     |                                        |                                          |                        |           |             |
| worsened                                                                                | 31.8         | 36.4                   | 29.5                       |                  |    |      |                     |                                        |                                          |                        |           |             |
| <b>Self-reported changes of study motivation</b>                                        |              |                        |                            |                  |    |      |                     |                                        |                                          |                        |           |             |
| increased                                                                               | 13.6         | 11.4                   | 14.8                       | 2.794            | 2  | .247 | 16.0                | 16.0                                   | 16.0                                     | 0.016                  | 2         | .992        |
| unchanged                                                                               | 50.8         | 43.2                   | 54.5                       |                  |    |      | 47.3                | 48.0                                   | 47.0                                     |                        |           |             |
| decreased                                                                               | 35.6         | 45.5                   | 30.7                       |                  |    |      | 36.7                | 36.0                                   | 37.0                                     |                        |           |             |
| <b>Burdening aspects<sup>1</sup></b>                                                    | Not asked    |                        |                            |                  |    |      | <b>Whole sample</b> | <b>Dental students (49&lt;n&gt;50)</b> | <b>Medical students (99&lt;n&gt;100)</b> | <b>chi<sup>2</sup></b> | <b>df</b> | <b>p</b>    |
| Preparation for (final) exams                                                           | -            | -                      | -                          | -                | -  | -    | 63.3                | 76.0                                   | 57.0                                     | 5.182                  | 1         | <b>.023</b> |
| Lack of practical training                                                              | -            | -                      | -                          |                  |    |      | 43.3                | 52.0                                   | 39.0                                     | 2.294                  | 1         | .130        |
| Few social contacts (private)                                                           | -            | -                      | -                          |                  |    |      | 43.3                | 34.0                                   | 48.0                                     | 2.661                  | 1         | .103        |
| Lack of interaction with fellow students                                                | -            | -                      | -                          | -                | -  | -    | 56.0                | 52.0                                   | 58.0                                     | .487                   | 1         | .485        |
| Concomitants of the CoViD-19 pandemic (contact restrictions, mandatory facemasks, etc.) | -            | -                      | -                          |                  |    |      | 22.0                | 24.0                                   | 21.0                                     | .175                   | 1         | .676        |
| General uncertainty                                                                     | -            | -                      | -                          |                  |    |      | 36.0                | 54.0                                   | 27.0                                     | 10.547                 | 1         | <b>.001</b> |

1  
2  
3 Note: n=number; M = mean; SD = standard deviation; df = degrees of freedom; p = p-value, significance level p<.05

4 <sup>1</sup>dichotomized: burdened (s. Table above) including “somewhat burdensome” and “very burdensome” vs. not burdened including “not at all burdensome” and  
5 “a little burdensome”  
6  
7  
8  
9  
10  
11  
12  
13  
14  
15  
16  
17  
18  
19  
20  
21  
22  
23  
24  
25  
26  
27  
28  
29  
30  
31  
32  
33  
34  
35  
36  
37  
38  
39  
40  
41  
42  
43  
44  
45  
46

For peer review only



### Burdening aspects

Many of students felt burdened due to the lack of interaction with fellow students. In comparison to medical students, significantly more dental students stated that they were burdened with regard to the exams and the general uncertainty (Table 3).

Binary logistic regression indicated that medical students were significantly more likely to experience serious worries regarding the current study situation during COVID-19 than dental students at t1. At t2 higher distress was associated with a higher likelihood for reporting serious worries regarding the current study situation during COVID-19 (Table 4).

**Table 4:** Binary logistic regression models on the association of study subject, depression and distress with serious worries in dental and medical students during the COVID-19 pandemic.

| May 2020                    | Odds ratio (OR) | 95% confidence interval (CI) | P value | effect size <sup>1</sup> |
|-----------------------------|-----------------|------------------------------|---------|--------------------------|
| Subject of study            |                 |                              |         |                          |
| dental                      | Reference       |                              | n.a.    | .032                     |
| medical                     | 1.149           | 1.013 - 1.304                | .031    |                          |
| Distress (DT)               | 1.386           | 0.965 - 1.991                | .078    |                          |
| Depression symptoms (PHQ-2) | 1.549           | 0.933 - 2.571                | .091    |                          |
| <b>July 2020</b>            |                 |                              |         |                          |
| Distress (DT)               | 1.802           | 1.277 – 2.542                | .001    | 0.24                     |

<sup>1</sup>According to Cohen's guidelines (1988) we considered  $f^2 = .02$  to be a small effect,  $f^2 = .15$  as a medium effect, and  $f^2 = .35$  as a large effect.

### Current concerns and helpful aspects

A total of 52 students (39%) provided optional free-text responses regarding the question "What is currently occupying you most in your current study situation?". We identified five categories in a multistage inductive process. The most frequent categories were "difficulties with self-regulated learning and self-motivation", followed by "study-related worries and uncertainty", "lack of feedback from other students and lecturers" and "lack of practical training". Significantly more dental (21%) than medical students (5%) reported concerns about the lack of practical training ( $\chi^2 = 8.362$ ;  $df = 1$ ;  $p = .004$ ;  $p < .05$ ) (Table 5).

Furthermore, 53 students (40%) completed optional free-text responses to the question "What do you currently experience as particularly helpful?". Again five categories were identified through a multi-step inductive process. The most common categories were "Exchange with other students and lecturers", followed by "flexibility due to online lessons", "self-regulation, -motivation and -

1  
2  
3 structuring", and "balance through sports and leisure". Dental and medical students did not differ  
4 significantly in their answers with regard to helpful aspects (Table 5).  
5  
6  
7  
8  
9  
10  
11  
12  
13  
14  
15  
16  
17  
18  
19  
20  
21  
22  
23  
24  
25  
26  
27  
28  
29  
30  
31  
32  
33  
34  
35  
36  
37  
38  
39  
40  
41  
42  
43  
44  
45  
46  
47  
48  
49  
50  
51  
52  
53  
54  
55  
56  
57  
58  
59  
60

For peer review only

**Table 5:** Categories, examples and quantified responses by category for the questions “What is currently occupying you most in your current study situation?” and “What do you currently experience as particularly helpful?” in May 2020 (n=132)

| What is currently occupying you most?                                                                                                                                                          |                                                                                                                                                                                                                                                                                                                                                                                                                                                                                        | Whole sample (n=132) mentioned | Dental students (n=44) mentioned | Medical students (n=88) mentioned |                  |    |      |
|------------------------------------------------------------------------------------------------------------------------------------------------------------------------------------------------|----------------------------------------------------------------------------------------------------------------------------------------------------------------------------------------------------------------------------------------------------------------------------------------------------------------------------------------------------------------------------------------------------------------------------------------------------------------------------------------|--------------------------------|----------------------------------|-----------------------------------|------------------|----|------|
| Category and subcategory                                                                                                                                                                       | Example                                                                                                                                                                                                                                                                                                                                                                                                                                                                                | %                              | %                                | %                                 | Chi <sup>2</sup> | df | p    |
| <b>Difficulties with self-regulated learning</b><br>(n = 20; 15%)<br><ul style="list-style-type: none"> <li>• Self-Motivation</li> <li>• Difficulties with new learning environment</li> </ul> | "Self-motivation- the exchange with fellow students and lecturers is missing, and therefore one has to motivate oneself every day anew to sit down at home (the library as a room for studying is also missing) and to motivate oneself to nevertheless 'attend' all study courses in time and to catch up on the study-work."<br><br>"Since I don't have the proper learning environment at home, I found it difficult to learn the very extensive content in an appropriate manner." | 15.2                           | 15.9                             | 14.8                              | 0.029            | 1  | .864 |
| <b>Study-related worries and uncertainty</b><br>(n = 19; 14%)                                                                                                                                  | "Extreme pressure to teach myself the mass of content in a short time through e-learning in order to succeed on the exam."                                                                                                                                                                                                                                                                                                                                                             | 14.4                           | 20.5                             | 11.4                              | 1.967            | 1  | .161 |

|                                                                                                                         |                                                                                                                                                  |      |      |      |       |   |       |
|-------------------------------------------------------------------------------------------------------------------------|--------------------------------------------------------------------------------------------------------------------------------------------------|------|------|------|-------|---|-------|
| <ul style="list-style-type: none"> <li>Concerns to perform worse/ to fail</li> <li>Study-related uncertainty</li> </ul> | "The uncertainty of if and when face-to-face classes can be held again, and if potentially my study time will be extended due to this pandemic." |      |      |      |       |   |       |
| <b>Lack of feedback from other students and lecturers</b><br>(n = 15; 11%)                                              | "Due to the online format, the exchange with fellow students and the lecturers is missing. (...)."                                               | 11.4 | 11.4 | 11.4 | 0.000 | 1 | 1.000 |
| <b>Lack of practical training</b><br>(n = 13; 10%)                                                                      | "The practical components in dental education are essential and (...) are now being cancelled. (...)."                                           | 9.8  | 20.5 | 4.5  | 8.362 | 1 | .004  |
| <b>Other</b><br>(n = 9; 7%)                                                                                             | "Lack of available childcare. Learning with (...) children at home is a challenge."                                                              | 6.8  | 11.4 | 4.5  | 2.146 | 1 | .143  |
| <b>What do you currently experience as particularly helpful?</b>                                                        |                                                                                                                                                  |      |      |      |       |   |       |
| <b>Category</b>                                                                                                         | <b>Example</b>                                                                                                                                   |      |      |      |       |   |       |
| <b>Exchange with students and lecturers</b><br>(n = 18; 14%)                                                            | "Intensive exchange with fellow students and lecturers."                                                                                         | 13.6 | 15.9 | 12.5 | 0.289 | 1 | .591  |
| <b>Flexibility due to online lessons</b><br>(n = 17; 13%)                                                               | "The online semester also brings many advantages. You can arrange everything yourself and work at your                                           | 12.9 | 15.9 | 11.4 | 0.540 | 1 | .462  |

|                                                           |                                                                                              |     |      |     |       |   |      |
|-----------------------------------------------------------|----------------------------------------------------------------------------------------------|-----|------|-----|-------|---|------|
|                                                           | own pace. This also takes away a lot of stress for me personally (...)"                      |     |      |     |       |   |      |
| <b>Structure and self-discipline</b><br>(n = 13; 10%)     | "Studying online to regain routine in everyday life."                                        | 9.8 | 11.4 | 9.1 | 0.171 | 1 | .680 |
| <b>Balance through sports and leisure</b><br>(n = 11; 8%) | "The fact that I can do my team sports again, that gives me enough variety and distraction " | 8.3 | 11.4 | 6.8 | 0.793 | 1 | .373 |
| <b>Other</b><br>(n = 9; 7%)                               | "Encouragement of friends and family"                                                        | 6.8 | 9.1  | 5.7 | 0.537 | 1 | .464 |

Note: n=number; df = degrees of freedom; p = p-value, significance level p<.05

## DISCUSSION

This study investigated the mental burden and study situation among undergraduate dental and medical students after the initial stage of the COVID-19 pandemic from May 2020 to July 2020. In line with previous studies conducted before the pandemic dental and medical students reported high levels of distress, anxiety and depression[8, 12, 42]. Compared to the norm population students of both professions reported significantly higher levels of anxiety and depression, consistent with findings of other studies[8, 43]. In light of the COVID-19 pandemic, the presence of additional pandemic specific stressors is likely[22]. A recent study showed that for most students isolation from student social networks is associated with increased anxiety levels[24]. According to our qualitative data, the lack of direct contact with fellow students, which could only take place via online media, affects both student professions negatively. For dental students, the lack of practical training played a major role, as dentists usually take dental courses from the first semester onwards to learn the practical skills from early stage on[44]. In comparison, this issue does not yet affect medical students as much in the early stages of their studies, as the undergraduate medical curriculum in Germany includes fewer practical training during this time[45]. In sum this probably accounts for our findings that reported levels of anxiety and depression are even higher than among students of the same medical school prior to the Corona pandemic[8].

With regard to the study situation, medical and in particular dental students were concerned about their current study situation. This trend continued in the further course of the pandemic. These results corroborate recent findings in a representative sample in Austria with a notable decline in mental health during the pandemic[46].

In line with the findings of Stangvaltaite-Mouhat et al. (2020) female dental students showed more pronounced anxiety symptoms than male dental students in our study[11]. This underlines that mental burden may be higher among female students in general[47]. Recent studies also suggest that women are particular burdened during the COVID-19 pandemic[46, 48, 49, 50, 51]. Furthermore several studies showed that certain age groups, including individuals between 18 and 25 years old - the most common age group in students - suffered more from mental distress[46, 48, 50, 52]. Qiu et al. (2020) suspect social media to be one of the causes[48]. Previous research seems to confirm this hypothesis as younger people tend to receive a large amount of information via social media, which can easily trigger stress[53]. The easy accessibility and constant presence of pandemic information may lead to an increase in the duration of information consumption. This increasing duration reinforces the potential negative influence on mental health[54]. A noteworthy finding is that dental students reported increased levels of distress, anxiety and more worries in the second survey whereas medical students' scores were slightly lower at the second survey.

1  
2  
3 There are some limitations of our study. The cross-sectional surveys at two different times do not allow  
4 causal statements about longitudinal developments. However, due to the high response rates (65-87%  
5 in the first and 81-82% in the second survey) one may assume that a majority of the respondents  
6 participated in both surveys. Thus, these single-institutional and cross-sectional surveys achieve a high  
7 level of comparability and representativeness.  
8  
9

10  
11  
12 Furthermore, no comparisons can be made with the situation before the outbreak of the pandemic,  
13 among the same population. Nevertheless, the study by Heinen et al. (2017) conducted at the same  
14 medical school with the same measures serves as a valid context to frame our findings[8].  
15  
16

## 17 Conclusion

18  
19 Overall students of medicine and dentistry are particularly affected by high mental distress and burden  
20 due to the demanding contents and structure of their studies. It is likely that the concomitant  
21 symptoms of the pandemic have an additional negative impact on the levels of stress, anxiety and  
22 depression of the students.  
23  
24

25  
26 Especially dental students reported higher levels of burden which might be associated with the high  
27 practical content early in their studies. The increase in anxiety levels of dental students might be  
28 associated with the duration of the restrictions of especially the practical content during the  
29 undergraduate study. Against this background, further monitoring of both dental and medical students  
30 during pandemic times and would be important in order to develop and introduce tailored prevention  
31 concepts adapted to the specific study situation.  
32  
33  
34  
35  
36  
37  
38  
39

40 **Acknowledgements:** We would like to thank all students who participated in the study and the  
41 evaluation team of the faculty who administered the online survey.  
42  
43  
44  
45

46 **Author contributions:** JG designed the study and contributed to the analysis and interpretation of the  
47 data. She critically revised the manuscript during the internal revision process and wrote continuing  
48 drafts as well as the final draft of the manuscript. ASW analyzed the data and contributed to the  
49 interpretation of the data. She wrote the first draft of the manuscript and critically revised the  
50 manuscript during the internal revision process. IH contributed to the analysis and interpretation of  
51 the data. She was involved in drafting the article and critically revised the manuscript during the  
52 internal revision process. CB designed the study, analyzed the data and contributed to the  
53 interpretation of the data. She wrote the first draft of the manuscript and critically revised the  
54 manuscript during the internal revision process. The corresponding author attests that all listed  
55 authors meet authorship criteria and that no others meeting the criteria have been omitted.  
56  
57  
58  
59  
60

**Funding:** This research received no specific grant from any funding agency in the public, commercial or not-for-profit sectors

**Competing interests:** The authors declare that they have no competing interests.

**Patient consent form:** Not required.

**Ethics approval:** Institutional ethical approval was obtained from the local ethics board of the Center for Psychosocial Medicine at the University Medical Center Hamburg-Eppendorf, approval number LPEK-0161, prior to commencement of this research.

**Data availability statement:** As ethical approval was not obtained to make data sharing possible outside of the listed research team, no additional data are available.

## References

1. Vindegaard N, Benros ME. COVID-19 pandemic and mental health consequences: Systematic review of the current evidence. *Brain Behav Immun* 2020;89:531-42.
2. Empfehlungen II der Deutschen Hochschulmedizin zum Studium der Humanmedizin und Zahnmedizin während der aktuellen COVID-19-Pandemie, 18.03.2020.: Verband der Universitätsklinika Deutschlands und MFT Medizinischer Fakultätentag; 2020. [https://www.uniklinika.de/fileadmin/user\\_upload/Covid-19-Empfehlungen\\_DHM\\_zum\\_Medizinstudium\\_2020-03-18.pdf](https://www.uniklinika.de/fileadmin/user_upload/Covid-19-Empfehlungen_DHM_zum_Medizinstudium_2020-03-18.pdf) (accessed 8 Jun 2020).
3. Whelan A, Prescott J, Young G, Catanese VM. Guidance on Medical Students' Clinical Participation: Effective Immediately.: Association of American Academic Colleges.; 2020 [updated March 17, 2020]. <https://lcme.org/wp-content/uploads/filebase/March-17-2020-Guidance-on-Mediical-Students-Clinical-Participation.pdf>. (accessed 8 Jun 2020).
4. Guse J, Heinen I, Kurre J, Mohr S, Bergelt C. Perception of the study situation and mental burden during the COVID-19 pandemic among undergraduate medical students with and without mentoring. *GMS J Med Educ* 2020;37(7):Doc72.
5. Miller DG, Pierson L, Doernberg S. The Role of Medical Students During the COVID-19 Pandemic. *Ann Intern Med*. 2020; Menon A, Klein EJ, Kollars K, Kleinhenz ALW. Medical Students Are Not Essential Workers: Examining Institutional Responsibility During the COVID-19 Pandemic. *Acad Med* 2020;95(8):1149-51.
6. Schwenk TL, Davis L, Wimsatt LA. Depression, stigma, and suicidal ideation in medical students. *JAMA*. 2010;304(11):1181-90; Bacchi S, Licinio J. Resilience and Psychological Distress in Psychology and Medical Students. *Acad Psychiatry* 2017;41(2):185-8.



- 1
- 2
- 3 7. Hope V, Henderson M. Medical student depression, anxiety and distress outside North America: a
- 4 systematic review. *Med Educ* 2014;48(10):963-79.
- 5
- 6 8. Heinen I, Bullinger M, Kocalevent RD. Perceived stress in first year medical students - associations with
- 7 personal resources and emotional distress. *BMC Med Educ* 2017;17(1):4.
- 8
- 9
- 10 9. Knipe D, Maughan C, Gilbert J, Dymock D, Moran P, Gunnell D. Mental health in medical, dentistry and
- 11 veterinary students: cross-sectional online survey. *BJPsych Open* 2018;4(6):441-6.
- 12
- 13 10. Puthran R, Zhang MW, Tam WW, Ho RC. Prevalence of depression amongst medical students: a meta-
- 14 analysis. *Med Educ* 2016;50(4):456-68.
- 15
- 16 11. Stangvaltaite-Mouhat L, Puriene A, Chalas R et al. Self-reported psychological problems amongst
- 17 undergraduate dental students: A pilot study in seven European countries. *Eur J Dent Educ*
- 18 2020;24(2):341-50.
- 19
- 20 12. Basudan S, Binanzan N, Alhassan A. Depression, anxiety and stress in dental students. *Int J Med Educ*
- 21 2017;8:179-86.
- 22
- 23
- 24 13. Bathla M, Singh M, Kulhara P et al. Evaluation of anxiety, depression and suicidal intent in
- 25 undergraduate dental students: A cross-sectional study. *Contemp Clin Dent* 2015;6(2):215-22.
- 26
- 27 14. Jurkat H, Hofer S, Richter L et al. [Quality of life, stress management and health promotion in medical
- 28 and dental students. A comparative study]. *Dtsch Med Wochenschr* 2011;136(23):1245-50.
- 29
- 30 15. Harris RC, Millichamp CJ, Thomson WM. Stress and coping in fourth-year medical and dental students.
- 31 *N Z Dent J* 2015;111(3):102-8.
- 32
- 33 16. Astill S, Ricketts N, Singh LA et al. Environmental and perceived stress in Australian dental
- 34 undergraduate students: Preliminary outcomes. *J Dent Res Dent Clin Dent Prospects* 2016;10(4):270-9.
- 35
- 36 17. Petzold MB, Plag J, Ströhle A. Dealing with psychological distress by healthcare professionals during
- 37 the COVID-19 pandemic. *Der Nervenarzt* 2020;91(5):417-21.
- 38
- 39 18. Hawryluck L, Gold WL, Robinson S et al. SARS control and psychological effects of quarantine, Toronto,
- 40 Canada. *Emerg Infect Dis* 2004;10(7):1206-12.
- 41
- 42 19. Wang C, Pan R, Wan X et al. Immediate Psychological Responses and Associated Factors during the
- 43 Initial Stage of the 2019 Coronavirus Disease (COVID-19) Epidemic among the General Population in
- 44 China. *Int J Environ Res Public Health* 2020;17(5).
- 45
- 46 20. Lai J, Ma S, Wang Y et al. Factors Associated With Mental Health Outcomes Among Health Care
- 47 Workers Exposed to Coronavirus Disease 2019. *JAMA Netw Open*. 2020;3(3):e203976.
- 48
- 49 21. Bao Y, Sun Y, Meng S et al. 2019-nCoV epidemic: address mental health care to empower society.
- 50 *Lancet* 2020;395(10224):e37-e8.
- 51
- 52 22. Inter-Agency Standing Committee (IASC). IASC Guidance on Operational considerations for
- 53 Multisectoral Mental Health and Psychosocial Support Programmes during the COVID-19 Pandemic
- 54
- 55
- 56
- 57
- 58
- 59
- 60

- 1  
2  
3 IASC Guidance on Operational considerations for Multisectoral MHPSS Programmes during the COVID-  
4 19 Pandemic.pdf [updated 25 Jun 2020] (accessed 18 Mar 2020).
- 5  
6 23. Odriozola-González P, Planchuelo-Gómez Á, Irurtia MJ et al. Psychological effects of the COVID-19  
7 outbreak and lockdown among students and workers of a Spanish university. *Psychiatry Research*  
8 2020;290:113108.
- 9  
10  
11 24. Elmer T, Mepham K, Stadtfeld C. Students under lockdown: Comparisons of students' social networks  
12 and mental health before and during the COVID-19 crisis in Switzerland. *PLoS One*  
13 2020;15(7):e0236337.
- 14  
15  
16 25. Li Y, Wang Y, Jiang J et al. Psychological distress among health professional students during the COVID-  
17 19 outbreak. *Psychological Medicine* 2020:1-3.
- 18  
19  
20 26. O'Byrne L, Gavin B, McNicholas F. Medical students and COVID-19: the need for pandemic  
21 preparedness. *J Med Ethics* 2020;46(9):623-6.
- 22  
23 27. [dataset] Steinmetz, H., Batzdorfer, V., Bosnjak, M. Data from: The ZPID lockdown measures dataset.  
24 ZPID Science Information Online, 20(1). 8 June 2020. <http://dx.doi.org/10.23668/psycharchives.3019>.
- 25  
26 28. <https://www.hrk.de/activities/the-covid-19-pandemic-and-the-german-universities/> [website].  
27  
28 Berlin: HRK German Rectors' Conference (updated 2020 July 28, accessed 29 Jul 2020).
- 29  
30 29. Rose S. Medical Student Education in the Time of COVID-19. *JAMA*. 2020.
- 31  
32 30. Gerhard-Szep S, Güntsch A, Pospiech P et al. Assessment formats in dental medicine: An overview.  
33 *GMS J Med Educ* 2016;33(4):Doc65.
- 34  
35 31. Rheingans A, Soulos A, Mohr S, Meyer J, Guse AH. The Hamburg integrated medical degree program  
36 iMED. *GMS J Med Educ* 2019;36(5):Doc52.
- 37  
38 32. Mehnert A, Müller D, Lehmann C, Koch U. Die deutsche Version des NCCN Distress-Thermometers.  
39 *Zeitschrift für Psychiatrie, Psychologie und Psychotherapie* 2006;54(3):213-23.
- 40  
41 33. Kroenke K, Spitzer RL, Williams JB, Lowe B. An ultra-brief screening scale for anxiety and depression:  
42 the PHQ-4. *Psychosomatics*. 2009;50(6):613-21.
- 43  
44 34. Khubchandani J, Brey R, Kotecki J, Kleinfelder J, Anderson J. The Psychometric Properties of PHQ-4  
45 Depression and Anxiety Screening Scale Among College Students. *Archives of Psychiatric Nursing*  
46 2016;30(4):457-62.
- 47  
48 35. Cohen S, Kamarck T, Mermelstein R. A global measure of perceived stress. *J Health Soc Behav*  
49 1983;24(4):385-96.
- 50  
51 36. Studierende: Deutschland, Semester, Nationalität, Geschlecht, Studienfach [website]. [https://www-  
52 genesis.destatis.de/genesis/online?operation=previous&levelindex=1&step=1&titel=Ergebnis&levelid=1616753759559&acceptscookies=false#abreadcrumb](https://www-genesis.destatis.de/genesis/online?operation=previous&levelindex=1&step=1&titel=Ergebnis&levelid=1616753759559&acceptscookies=false#abreadcrumb) (accessed 26 Mar 2021).
- 53  
54  
55  
56  
57  
58  
59 37. Field A. Discovering statistics using IBM SPSS statistics : and sex and drugs and rock 'n' roll. 4. ed. Los  
60 Angeles [i.a.]: Sage; 2013.

- 1  
2  
3 38. Cohen J. Statistical power analysis for the behavioral sciences. 2. ed. Hillsdale, NJ [i.a.]: Erlbaum; 1988.
- 4  
5 39. Hsieh HF, Shannon SE. Three approaches to qualitative content analysis. *Qualitative health research*  
6 2005;15(9):1277-88.
- 7  
8 40. Monrouxe LV, Rees CE. When I say ... quantification in qualitative research. *Med Educ* 2020;54(3):186-  
9 7.
- 10  
11 41. Löwe B, Wahl I, Rose M et al. A 4-item measure of depression and anxiety: validation and  
12 standardization of the Patient Health Questionnaire-4 (PHQ-4) in the general population. *J Affect*  
13 *Disord* 2010;122(1-2):86-95.
- 14  
15 42. Jiménez-Ortiz JL, Islas-Valle RM, Jiménez-Ortiz JD, Pérez-Lizárraga E, Hernández-García ME, González-  
16 Salazar F. Emotional exhaustion, burnout, and perceived stress in dental students. *Journal of*  
17 *International Medical Research* 2019;47(9):4251-9.
- 18  
19 43. Stormon N, Ford PJ, Kisely S, Bartle E, Eley DS. Depression, anxiety and stress in a cohort of Australian  
20 dentistry students. *Eur J Dent Educ* 2019;23(4):507-14.
- 21  
22 44. Mekhemar M, Conrad J, Attia S, Dörfer C. Oral Health Attitudes among Preclinical and Clinical Dental  
23 Students in Germany. *International journal of environmental research and public health*  
24 2020;17(12):4253.
- 25  
26 45. Chenot JF. Undergraduate medical education in Germany. *Ger Med Sci* 2009;7:Doc02.
- 27  
28 46. Dale R, Budimir S, Probst T, Stippl P, Pieh C. Mental Health during the COVID-19 Lockdown over the  
29 Christmas Period in Austria and the Effects of Sociodemographic and Lifestyle Factors. *Int J Environ Res*  
30 *Public Health* 2021;18(7).
- 31  
32 47. Dyrbye LN, Thomas MR, Shanafelt TD. Systematic review of depression, anxiety, and other indicators  
33 of psychological distress among U.S. and Canadian medical students. *Acad Med* 2006;81(4):354-73.
- 34  
35 48. Qiu J, Shen B, Zhao M, Wang Z, Xie B, Xu Y. A nationwide survey of psychological distress among  
36 Chinese people in the COVID-19 epidemic: implications and policy recommendations. *General*  
37 *psychiatry* 2020;33(2):e100213.
- 38  
39 49. Park CL, Russell BS, Fendrich M, Finkelstein-Fox L, Hutchison M, Becker J. Americans' COVID-19 Stress,  
40 Coping, and Adherence to CDC Guidelines. *Journal of general internal medicine* 2020;35(8):2296-303.;
- 41  
42 50. Liu N, Zhang F, Wei C, Jia Y, Shang Z, Sun L, et al. Prevalence and predictors of PTSS during COVID-19  
43 outbreak in China hardest-hit areas: Gender differences matter. *Psychiatry Res* 2020;287:112921.
- 44  
45 51. Pieh C, Budimir S, Probst T. The effect of age, gender, income, work, and physical activity on mental  
46 health during coronavirus disease (COVID-19) lockdown in Austria (vol 136, 110186, 2020). *J*  
47 *Psychosom Res* 2020;139.
- 48  
49 52. Brooks SK, Webster RK, Smith LE et al. The psychological impact of quarantine and how to reduce it:  
50 rapid review of the evidence. *Lancet* 2020;395(10227):912-20.
- 51  
52 53. Gabriel R, Röhrs HP. Social Media: Springer Gabler; 2017.
- 53  
54  
55  
56  
57  
58  
59  
60

- 1  
2  
3 54. Huang Y, Zhao N. Generalized anxiety disorder, depressive symptoms and sleep quality during COVID-  
4 19 outbreak in China: a web-based cross-sectional survey. *Psychiatry Res* 2020;288:112954.  
5  
6  
7  
8  
9  
10  
11  
12  
13  
14  
15  
16  
17  
18  
19  
20  
21  
22  
23  
24  
25  
26  
27  
28  
29  
30  
31  
32  
33  
34  
35  
36  
37  
38  
39  
40  
41  
42  
43  
44  
45  
46  
47  
48  
49  
50  
51  
52  
53  
54  
55  
56  
57  
58  
59  
60

For peer review only

# Reporting checklist for cross sectional study.

Based on the STROBE cross sectional guidelines.

## Instructions to authors

Complete this checklist by entering the page numbers from your manuscript where readers will find each of the items listed below.

Your article may not currently address all the items on the checklist. Please modify your text to include the missing information. If you are certain that an item does not apply, please write "n/a" and provide a short explanation.

Upload your completed checklist as an extra file when you submit to a journal.

In your methods section, say that you used the STROBE cross sectional reporting guidelines, and cite them as:

von Elm E, Altman DG, Egger M, Pocock SJ, Gotsche PC, Vandenbroucke JP. The Strengthening the Reporting of Observational Studies in Epidemiology (STROBE) Statement: guidelines for reporting observational studies.

|                           |                                                                                                        | Page   |
|---------------------------|--------------------------------------------------------------------------------------------------------|--------|
|                           | Reporting Item                                                                                         | Number |
| <b>Title and abstract</b> |                                                                                                        |        |
| Title                     | <a href="#">#1a</a> Indicate the study's design with a commonly used term in the title or the abstract | 1      |

|    |                      |                     |                                                                 |   |
|----|----------------------|---------------------|-----------------------------------------------------------------|---|
| 1  | Abstract             | <a href="#">#1b</a> | Provide in the abstract an informative and balanced summary     | 2 |
| 2  |                      |                     | of what was done and what was found                             |   |
| 3  |                      |                     |                                                                 |   |
| 4  |                      |                     |                                                                 |   |
| 5  |                      |                     |                                                                 |   |
| 6  | <b>Introduction</b>  |                     |                                                                 |   |
| 7  |                      |                     |                                                                 |   |
| 8  |                      |                     |                                                                 |   |
| 9  |                      |                     |                                                                 |   |
| 10 | Background /         | <a href="#">#2</a>  | Explain the scientific background and rationale for the         | 3 |
| 11 | rationale            |                     | investigation being reported                                    |   |
| 12 |                      |                     |                                                                 |   |
| 13 |                      |                     |                                                                 |   |
| 14 |                      |                     |                                                                 |   |
| 15 | Objectives           | <a href="#">#3</a>  | State specific objectives, including any prespecified           | 4 |
| 16 |                      |                     | hypotheses                                                      |   |
| 17 |                      |                     |                                                                 |   |
| 18 |                      |                     |                                                                 |   |
| 19 |                      |                     |                                                                 |   |
| 20 | <b>Methods</b>       |                     |                                                                 |   |
| 21 |                      |                     |                                                                 |   |
| 22 |                      |                     |                                                                 |   |
| 23 | Study design         | <a href="#">#4</a>  | Present key elements of study design early in the paper         | 4 |
| 24 |                      |                     |                                                                 |   |
| 25 |                      |                     |                                                                 |   |
| 26 | Setting              | <a href="#">#5</a>  | Describe the setting, locations, and relevant dates, including  | 4 |
| 27 |                      |                     | periods of recruitment, exposure, follow-up, and data           |   |
| 28 |                      |                     | collection                                                      |   |
| 29 |                      |                     |                                                                 |   |
| 30 |                      |                     |                                                                 |   |
| 31 |                      |                     |                                                                 |   |
| 32 |                      |                     |                                                                 |   |
| 33 |                      |                     |                                                                 |   |
| 34 | Eligibility criteria | <a href="#">#6a</a> | Give the eligibility criteria, and the sources and methods of   | 4 |
| 35 |                      |                     | selection of participants.                                      |   |
| 36 |                      |                     |                                                                 |   |
| 37 |                      |                     |                                                                 |   |
| 38 |                      |                     |                                                                 |   |
| 39 |                      |                     |                                                                 |   |
| 40 |                      | <a href="#">#7</a>  | Clearly define all outcomes, exposures, predictors, potential   | 5 |
| 41 |                      |                     | confounders, and effect modifiers. Give diagnostic criteria, if |   |
| 42 |                      |                     | applicable                                                      |   |
| 43 |                      |                     |                                                                 |   |
| 44 |                      |                     |                                                                 |   |
| 45 |                      |                     |                                                                 |   |
| 46 |                      |                     |                                                                 |   |
| 47 | Data sources /       | <a href="#">#8</a>  | For each variable of interest give sources of data and details  | 5 |
| 48 | measurement          |                     | of methods of assessment (measurement). Describe                |   |
| 49 |                      |                     | comparability of assessment methods if there is more than       |   |
| 50 |                      |                     | one group. Give information separately for for exposed and      |   |
| 51 |                      |                     | unexposed groups if applicable.                                 |   |
| 52 |                      |                     |                                                                 |   |
| 53 |                      |                     |                                                                 |   |
| 54 |                      |                     |                                                                 |   |
| 55 |                      |                     |                                                                 |   |
| 56 |                      |                     |                                                                 |   |
| 57 |                      |                     |                                                                 |   |
| 58 |                      |                     |                                                                 |   |
| 59 |                      |                     |                                                                 |   |
| 60 |                      |                     |                                                                 |   |

|    |                |                      |                                                               |     |
|----|----------------|----------------------|---------------------------------------------------------------|-----|
| 1  | Bias           | <a href="#">#9</a>   | Describe any efforts to address potential sources of bias     | 7   |
| 2  |                |                      |                                                               |     |
| 3  |                |                      |                                                               |     |
| 4  | Study size     | <a href="#">#10</a>  | Explain how the study size was arrived at                     | 4   |
| 5  |                |                      |                                                               |     |
| 6  |                |                      |                                                               |     |
| 7  | Quantitative   | <a href="#">#11</a>  | Explain how quantitative variables were handled in the        | 6   |
| 8  | variables      |                      | analyses. If applicable, describe which groupings were        |     |
| 9  |                |                      | chosen, and why                                               |     |
| 10 |                |                      |                                                               |     |
| 11 |                |                      |                                                               |     |
| 12 |                |                      |                                                               |     |
| 13 |                |                      |                                                               |     |
| 14 |                |                      |                                                               |     |
| 15 | Statistical    | <a href="#">#12a</a> | Describe all statistical methods, including those used to     | 6   |
| 16 | methods        |                      | control for confounding                                       |     |
| 17 |                |                      |                                                               |     |
| 18 |                |                      |                                                               |     |
| 19 |                |                      |                                                               |     |
| 20 | Statistical    | <a href="#">#12b</a> | Describe any methods used to examine subgroups and            | 6   |
| 21 | methods        |                      | interactions                                                  |     |
| 22 |                |                      |                                                               |     |
| 23 |                |                      |                                                               |     |
| 24 |                |                      |                                                               |     |
| 25 |                |                      |                                                               |     |
| 26 | Statistical    | <a href="#">#12c</a> | Explain how missing data were addressed                       | 4   |
| 27 | methods        |                      |                                                               |     |
| 28 |                |                      |                                                               |     |
| 29 |                |                      |                                                               |     |
| 30 |                |                      |                                                               |     |
| 31 | Statistical    | <a href="#">#12d</a> | If applicable, describe analytical methods taking account of  | n/a |
| 32 | methods        |                      | sampling strategy                                             |     |
| 33 |                |                      |                                                               |     |
| 34 |                |                      |                                                               |     |
| 35 |                |                      |                                                               |     |
| 36 | Statistical    | <a href="#">#12e</a> | Describe any sensitivity analyses                             | n/a |
| 37 | methods        |                      |                                                               |     |
| 38 |                |                      |                                                               |     |
| 39 |                |                      |                                                               |     |
| 40 |                |                      |                                                               |     |
| 41 |                |                      |                                                               |     |
| 42 | <b>Results</b> |                      |                                                               |     |
| 43 |                |                      |                                                               |     |
| 44 |                |                      |                                                               |     |
| 45 | Participants   | <a href="#">#13a</a> | Report numbers of individuals at each stage of study—eg       | 7   |
| 46 |                |                      | numbers potentially eligible, examined for eligibility,       |     |
| 47 |                |                      | confirmed eligible, included in the study, completing follow- |     |
| 48 |                |                      | up, and analysed. Give information separately for for         |     |
| 49 |                |                      | exposed and unexposed groups if applicable.                   |     |
| 50 |                |                      |                                                               |     |
| 51 |                |                      |                                                               |     |
| 52 |                |                      |                                                               |     |
| 53 |                |                      |                                                               |     |
| 54 |                |                      |                                                               |     |
| 55 |                |                      |                                                               |     |
| 56 |                |                      |                                                               |     |
| 57 | Participants   | <a href="#">#13b</a> | Give reasons for non-participation at each stage              | n/a |
| 58 |                |                      |                                                               |     |
| 59 |                |                      |                                                               |     |
| 60 |                |                      |                                                               |     |

|    |                   |                      |                                                                   |       |
|----|-------------------|----------------------|-------------------------------------------------------------------|-------|
| 1  | Participants      | <a href="#">#13c</a> | Consider use of a flow diagram                                    | n/a   |
| 2  |                   |                      |                                                                   |       |
| 3  |                   |                      |                                                                   |       |
| 4  | Descriptive data  | <a href="#">#14a</a> | Give characteristics of study participants (eg demographic,       | 7-8   |
| 5  |                   |                      | clinical, social) and information on exposures and potential      |       |
| 6  |                   |                      | confounders. Give information separately for exposed and          |       |
| 7  |                   |                      | unexposed groups if applicable.                                   |       |
| 8  |                   |                      |                                                                   |       |
| 9  |                   |                      |                                                                   |       |
| 10 |                   |                      |                                                                   |       |
| 11 |                   |                      |                                                                   |       |
| 12 |                   |                      |                                                                   |       |
| 13 |                   |                      |                                                                   |       |
| 14 | Descriptive data  | <a href="#">#14b</a> | Indicate number of participants with missing data for each        | 9; 11 |
| 15 |                   |                      | variable of interest                                              |       |
| 16 |                   |                      |                                                                   |       |
| 17 |                   |                      |                                                                   |       |
| 18 |                   |                      |                                                                   |       |
| 19 | Outcome data      | <a href="#">#15</a>  | Report numbers of outcome events or summary measures.             | n/a   |
| 20 |                   |                      | Give information separately for exposed and unexposed             |       |
| 21 |                   |                      | groups if applicable.                                             |       |
| 22 |                   |                      |                                                                   |       |
| 23 |                   |                      |                                                                   |       |
| 24 |                   |                      |                                                                   |       |
| 25 |                   |                      |                                                                   |       |
| 26 |                   |                      |                                                                   |       |
| 27 | Main results      | <a href="#">#16a</a> | Give unadjusted estimates and, if applicable, confounder-         | n/a   |
| 28 |                   |                      | adjusted estimates and their precision (eg, 95% confidence        |       |
| 29 |                   |                      | interval). Make clear which confounders were adjusted for         |       |
| 30 |                   |                      | and why they were included                                        |       |
| 31 |                   |                      |                                                                   |       |
| 32 |                   |                      |                                                                   |       |
| 33 |                   |                      |                                                                   |       |
| 34 |                   |                      |                                                                   |       |
| 35 |                   |                      |                                                                   |       |
| 36 |                   |                      |                                                                   |       |
| 37 | Main results      | <a href="#">#16b</a> | Report category boundaries when continuous variables were         | 9     |
| 38 |                   |                      | categorized                                                       |       |
| 39 |                   |                      |                                                                   |       |
| 40 |                   |                      |                                                                   |       |
| 41 |                   |                      |                                                                   |       |
| 42 | Main results      | <a href="#">#16c</a> | If relevant, consider translating estimates of relative risk into | n/a   |
| 43 |                   |                      | absolute risk for a meaningful time period                        |       |
| 44 |                   |                      |                                                                   |       |
| 45 |                   |                      |                                                                   |       |
| 46 |                   |                      |                                                                   |       |
| 47 |                   |                      |                                                                   |       |
| 48 | Other analyses    | <a href="#">#17</a>  | Report other analyses done—e.g., analyses of subgroups            | n/a   |
| 49 |                   |                      | and interactions, and sensitivity analyses                        |       |
| 50 |                   |                      |                                                                   |       |
| 51 |                   |                      |                                                                   |       |
| 52 |                   |                      |                                                                   |       |
| 53 | <b>Discussion</b> |                      |                                                                   |       |
| 54 |                   |                      |                                                                   |       |
| 55 |                   |                      |                                                                   |       |
| 56 | Key results       | <a href="#">#18</a>  | Summarise key results with reference to study objectives          | 17    |
| 57 |                   |                      |                                                                   |       |
| 58 |                   |                      |                                                                   |       |
| 59 |                   |                      |                                                                   |       |
| 60 |                   |                      |                                                                   |       |



|    |                          |                     |                                                                |    |
|----|--------------------------|---------------------|----------------------------------------------------------------|----|
| 1  | Limitations              | <a href="#">#19</a> | Discuss limitations of the study, taking into account sources  | 18 |
| 2  |                          |                     | of potential bias or imprecision. Discuss both direction and   |    |
| 3  |                          |                     | magnitude of any potential bias.                               |    |
| 4  |                          |                     |                                                                |    |
| 5  |                          |                     |                                                                |    |
| 6  |                          |                     |                                                                |    |
| 7  |                          |                     |                                                                |    |
| 8  |                          |                     |                                                                |    |
| 9  | Interpretation           | <a href="#">#20</a> | Give a cautious overall interpretation considering objectives, | 18 |
| 10 |                          |                     | limitations, multiplicity of analyses, results from similar    |    |
| 11 |                          |                     | studies, and other relevant evidence.                          |    |
| 12 |                          |                     |                                                                |    |
| 13 |                          |                     |                                                                |    |
| 14 |                          |                     |                                                                |    |
| 15 |                          |                     |                                                                |    |
| 16 | Generalisability         | <a href="#">#21</a> | Discuss the generalisability (external validity) of the study  | 18 |
| 17 |                          |                     | results.                                                       |    |
| 18 |                          |                     |                                                                |    |
| 19 |                          |                     |                                                                |    |
| 20 |                          |                     |                                                                |    |
| 21 |                          |                     |                                                                |    |
| 22 | <b>Other Information</b> |                     |                                                                |    |
| 23 |                          |                     |                                                                |    |
| 24 |                          |                     |                                                                |    |
| 25 | Funding                  | <a href="#">#22</a> | Give the source of funding and the role of the funders for the | 18 |
| 26 |                          |                     | present study and, if applicable, for the original study on    |    |
| 27 |                          |                     | which the present article is based                             |    |
| 28 |                          |                     |                                                                |    |
| 29 |                          |                     |                                                                |    |
| 30 |                          |                     |                                                                |    |
| 31 |                          |                     |                                                                |    |
| 32 |                          |                     |                                                                |    |

33 None The STROBE checklist is distributed under the terms of the Creative Commons Attribution  
34 License CC-BY. This checklist can be completed online using <https://www.goodreports.org/>, a tool  
35 made by the [EQUATOR Network](#) in collaboration with [Penelope.ai](#)  
36  
37  
38  
39  
40  
41  
42  
43  
44  
45  
46  
47  
48  
49  
50  
51  
52  
53  
54  
55  
56  
57  
58  
59  
60

# BMJ Open

## Mental burden and perception of the study situation among undergraduate students during the COVID-19 pandemic: a cross-sectional study and comparison of dental and medical students

|                                 |                                                                                                                                                                                                                                                                                                                                                                                                    |
|---------------------------------|----------------------------------------------------------------------------------------------------------------------------------------------------------------------------------------------------------------------------------------------------------------------------------------------------------------------------------------------------------------------------------------------------|
| Journal:                        | <i>BMJ Open</i>                                                                                                                                                                                                                                                                                                                                                                                    |
| Manuscript ID                   | bmjopen-2021-054728.R1                                                                                                                                                                                                                                                                                                                                                                             |
| Article Type:                   | Original research                                                                                                                                                                                                                                                                                                                                                                                  |
| Date Submitted by the Author:   | 29-Sep-2021                                                                                                                                                                                                                                                                                                                                                                                        |
| Complete List of Authors:       | Guse, Jennifer; University Medical Center Hamburg-Eppendorf, Department of Medical Psychology<br>Weegen, Annabel ; University Medical Center Hamburg-Eppendorf, Department of Medical Psychology<br>Heinen, Ines; University Medical Center Hamburg-Eppendorf, Department of Medical Psychology<br>Bergelt, Corinna; University Medical Center Hamburg-Eppendorf, Department of Medical Psychology |
| <b>Primary Subject Heading</b>: | Medical education and training                                                                                                                                                                                                                                                                                                                                                                     |
| Secondary Subject Heading:      | Mental health, Qualitative research                                                                                                                                                                                                                                                                                                                                                                |
| Keywords:                       | MEDICAL EDUCATION & TRAINING, COVID-19, MENTAL HEALTH, QUALITATIVE RESEARCH                                                                                                                                                                                                                                                                                                                        |
|                                 |                                                                                                                                                                                                                                                                                                                                                                                                    |

SCHOLARONE™  
Manuscripts



I, the Submitting Author has the right to grant and does grant on behalf of all authors of the Work (as defined in the below author licence), an exclusive licence and/or a non-exclusive licence for contributions from authors who are: i) UK Crown employees; ii) where BMJ has agreed a CC-BY licence shall apply, and/or iii) in accordance with the terms applicable for US Federal Government officers or employees acting as part of their official duties; on a worldwide, perpetual, irrevocable, royalty-free basis to BMJ Publishing Group Ltd ("BMJ") its licensees and where the relevant Journal is co-owned by BMJ to the co-owners of the Journal, to publish the Work in this journal and any other BMJ products and to exploit all rights, as set out in our [licence](#).

The Submitting Author accepts and understands that any supply made under these terms is made by BMJ to the Submitting Author unless you are acting as an employee on behalf of your employer or a postgraduate student of an affiliated institution which is paying any applicable article publishing charge ("APC") for Open Access articles. Where the Submitting Author wishes to make the Work available on an Open Access basis (and intends to pay the relevant APC), the terms of reuse of such Open Access shall be governed by a Creative Commons licence – details of these licences and which [Creative Commons](#) licence will apply to this Work are set out in our licence referred to above.

Other than as permitted in any relevant BMJ Author's Self Archiving Policies, I confirm this Work has not been accepted for publication elsewhere, is not being considered for publication elsewhere and does not duplicate material already published. I confirm all authors consent to publication of this Work and authorise the granting of this licence.

1  
2  
3 **Mental burden and perception of the study situation among undergraduate students during**  
4 **the COVID-19 pandemic: a cross-sectional study and comparison of dental and medical**  
5 **students**  
6  
7  
8  
9

10  
11 Jennifer Guse<sup>1</sup> (<https://orcid.org/0000-0001-5020-929X>), research assistant, Department of Medical  
12 Psychology, University Medical Center Hamburg-Eppendorf, Hamburg, Germany  
13

14  
15 Annabel Susan Weegen<sup>1</sup> (<https://orcid.org/0000-0001-5462-1775>), dental student, Department of  
16 Medical Psychology, University Medical Center Hamburg-Eppendorf, Hamburg, Germany  
17

18  
19 Ines Heinen (<https://orcid.org/0000-0001-7361-4554>), research assistant, Department of Medical  
20 Psychology, University Medical Center Hamburg-Eppendorf, Hamburg, Germany  
21

22  
23 Corinna Bergelt (<https://orcid.org/0000-0003-1413-1872>), associate professor, Department of  
24 Medical Psychology, University Medical Center Hamburg-Eppendorf, Hamburg, Germany, and  
25 Department of Medical Psychology, University Medicine Greifswald, Germany  
26  
27  
28

29  
30  
31 <sup>1</sup>Equal contributors  
32

33  
34  
35 Keywords: Dental students, medical students, COVID-19 pandemic, mental health, undergraduate  
36 medical education  
37  
38

39  
40  
41  
42  
43 Corresponding author:  
44

45 Dr. Jennifer Guse  
46

47 University Medical Center Hamburg-Eppendorf  
48

49 Center for Psychosocial Medicine  
50

51 Department of Medical Psychology  
52

53 Martinistraße 52, W26  
54

55 20246 Hamburg  
56

57 E-mail: [j.guse@uke.de](mailto:j.guse@uke.de)  
58

59  
60 Word count: 3.681

## ABSTRACT

**Objectives:** To investigate levels of distress, depression, anxiety, stress and perception of their current study situation during the COVID-19 pandemic among undergraduate dental and medical students.

**Design:** Observational, cross-sectional study including two consecutive surveys (May and July 2020).

**Setting:** A large medical school in Germany.

**Participants:** All first year dental and medical students were invited. 132 participating first year students (44 dental, 88 medical) from the first survey and 150 students (50 dental, 100 medical) from the second were included in our analyses.

**Primary and secondary outcome measures:** Mental burden (Distress Thermometer, Patient Health Questionnaire PHQ-4, Perceived Stress Scale, PSS-4) and self-reported changes in mental health and perception of study situation during the COVID-19 pandemic (self-developed items) were compared. Open-ended questions were analyzed by conventional content analyses.

**Results:** A considerable proportion of students (May 2020: 84.1%; July 2020: 77.3%) reported distress levels above cutoff. In July 2020, dental students reported significantly higher distress scores than medical students (dental:  $M=7.0$ ,  $SD=2.3$ ; medical:  $M=5.7$ ;  $SD=2.1$ ;  $p<.001$ ). More dental than medical students reported mild, moderate and severe levels of anxiety and depression symptoms. The majority stated that their mental health and study motivation had not changed during the pandemic. Logistic regression showed that being a dental student and experiencing higher distress were significantly associated with a higher likelihood for serious worries (OR: 4.0; CI (95%): 1.1 – 14.2). Regarding current concerns related to the pandemic, students most frequently reported difficulties with self-regulated learning (15.2%), study-related worries and uncertainty (14.4%), missing feedback of students and lecturers (11.4%) and lack of practical training (9.8%).

**Conclusion:** The results suggest that high mental burden and the lack of practical training among medical and dental students is an increasing problem, with a possibly even higher urgency in dental students. Tailored psychological and educational support offers during and after the COVID-19 pandemic might help them as they progress through (medical and) dental school.

### Strengths and limitations of this study

- This study offers in-depth exploration of students' mental health and perception of their study situation during the COVID-19 pandemic by combining quantitative data and qualitative data
- This study included well-established and valid instruments (quantitative data) and applied conventional content analyses with inductive categorization (qualitative data).

- Response rates of this study were high (65.3% - 87.2%).
- It is a single-institution study and the cross-sectional design does not allow causal statements about longitudinal developments.

## INTRODUCTION

The corona virus disease (COVID-19) pandemic and its consequences have an impact on the private, professional and social life of all people[1]. It has brought widespread disruption to undergraduate medical education[2, 3]. Thus medical students worldwide face major changes regarding their medical training and study motivation decreased[4]. Many medical schools have made changes to their curricula and campus life to protect patients and students by social distancing. Roles of medical students' during the COVID-19 pandemic are discussed controversial[5]. Even in the absence of the COVID-19 pandemic, mental burden is common among medical students[6, 7, 8] and several studies report lower mental health outcomes for medical students in the course of their medical studies compared to population reference samples[9]. In particular, depression and anxiety symptoms are reported among medical[7, 10] and dental students[11-13]. Often students feel that they do not have adequate coping strategies to deal with study-related workload and stress[14]. Dental students are highly stressed and perform at a comparable or higher stress level than medical students[15]. Studies have shown that the stress level increases with each semester, especially due to the high proportion of practical training in dental studies[13, 16].

In light of novel circumstances during the COVID-19 pandemic, uncertainty relating to personal and professional future and rapid changes medical students may be even more at risk of experiencing severe mental burden during the pandemic than before. Increased incidence rates of stress and mental burden are an expected response under the current conditions[17].

Studies have shown the negative impact of past pandemics[18] and the COVID-19 pandemic[19] on the general population, as well as on specific groups[20]. Health professionals may be particularly affected[21], as pandemic-specific stressors are added to the general ones[22]. High prevalence for mental health symptoms among health care workers exposed to COVID-19 was found[20]. Students are also highly burdened while facing new challenges raised by the pandemic's consequences[23, 24]. COVID-19 related mental stress, higher rates of depression and a high symptom burden from the acute stress response according to the COVID-19 pandemic are common especially among health care students[25], as they have to cope with mental and emotional issues, including stress and anxiety.

1  
2  
3 In contrast to the exposure of students in general during the COVID-19 pandemic, the mental burden  
4 of medical and dental students in particular is still poorly addressed in the international literature even  
5 though they are facing special challenges in health care[26].  
6  
7

8 Therefore, the aim of this study was to assess the magnitude of distress, depression and anxiety and  
9 stress among undergraduate dental and medical students in the course of the COVID-19 pandemic.  
10 Secondly, we aimed to explore students' perception of the study situation during the pandemic and  
11 compare dental and medical students' perception during the first lockdown period and thereafter.  
12  
13  
14  
15  
16  
17

## 18 **METHODS**

### 19 **Design and setting**

20 This observational study consists of two cross-sectional surveys conducted at the University Medical  
21 Center Hamburg-Eppendorf, Germany, from May 28, 2020 to June 7 (t1), 2020 and from July 16, 2020  
22 to July 31, 2020 (t2). During this period and before (since mid-March 2020) the German government  
23 announced several public health measures to suppress the spread of COVID-19 by increasing social  
24 distancing, i.e. the closure of schools, daycare, playgrounds and non-essential shops, the prohibition  
25 to meet more than one person from another household and depending on regional regulations the  
26 prohibition to leave the apartment without reason[27]. Concurrently lectures and seminars at the  
27 universities were predominantly held in a digital format to reduce interpersonal contact and to protect  
28 patients, students and faculty[28]. Thus, the learning environment and examination conditions for  
29 students have changed significantly. Many medical schools have discontinued their undergraduate  
30 medical training and transitioned most of their teaching to digital formats[29]. This included but was  
31 not limited to the transformation of Objective Structured Clinical Examinations (OSCE[30]) into  
32 Multiple Choice tests.  
33  
34  
35  
36  
37  
38  
39  
40  
41  
42  
43  
44  
45  
46

### 47 **Participants**

48 All first year dental students (n=68) enrolled in the integrated dental degree program iMED DENT  
49 launched in 2019 and medical students (n=352) enrolled in the integrated medical degree program  
50 iMED established in 2012 at the Medical School of the University of Hamburg, Germany[31] were  
51 invited to participate in the online surveys. Students were asked to complete an anonymous  
52 questionnaire linked to the voluntary curriculum evaluation conducted by the dean's office in regular  
53 intervals during the course of the year. A few days in advance the students were informed via e-mail  
54 of the study aims, voluntary participation and data protection regulations. Participants did not receive  
55 any incentives for answering the questionnaire.  
56  
57  
58  
59  
60

## Measures

We developed an online questionnaire and focused on symptoms of distress, depression and anxiety and stress by using established self-reporting questionnaires. Furthermore, we assessed the perception of the study situation during the pandemic and study motivation with self-developed items. Demographic characteristics (age in categories, gender) were also self-reported.

### Distress

We assessed students' distress at t1 (May 2020) and t2 (July 2020) using the German version of the Distress-Thermometer (DT), a brief screening instrument developed by the National Comprehensive Cancer Network (NCCN)[32]. The DT is a single-item instrument with a scale from 0-10. Higher scores indicate higher distress. Internationally a cutoff score of 4 is established as a signal that a person is distressed and needs support. The DT is a reliable and efficient screening instrument[32].

### Depression and anxiety

We measured depression and anxiety using the German version of the four-item Patient Health Questionnaire (PHQ-4), an ultra-brief screening instrument that consists of a two-item depression scale (PHQ-2) and a two-item anxiety scale (GAD-2)[33]. It assesses the amount of depression and anxiety symptoms the individual has felt during the past two weeks. A score of 3 or higher on the PHQ-2 and GAD-2 is established as a reasonable cut-off score clinically relevant levels of depressive and anxiety symptoms. The total PHQ-4 score is considered as an overall measure of symptom burden with the following categories: 0-2 normal, 3-5 mild, 6-8 moderate, 9-12 severe. It is an efficient screening instrument with good internal consistency and construct validity and areas under the curve between 0.84 (anxiety) and 0.79 (depression) among students[34].

### Changes in mental health and perception of study situation during the COVID-19 pandemic

Furthermore we administered five self-developed items to assess changes in students' mental health and perception of the study situation: Students were asked whether their mental health has changed since the beginning of the pandemic with five answer options (clearly improved; rather improved; unchanged; rather worsened; clearly worsened). They were asked if the assessment of their study situation has changed in the context of the pandemic with three answer options (No, I am as worried or unworried as before; Yes, I am somewhat worried; Yes, I am seriously worried). Furthermore



1  
2  
3 students were asked if the pandemic affected their possibility to participate in exams with five options  
4 to answer (No exams took place since the beginning of the pandemic; Exams took place without  
5 changes; Exams did not take place, but a new date is scheduled; Exams did not take place and no new  
6 date is scheduled yet; I was not able to attend exams due to quarantine or illness). Students were  
7 asked if their study motivation had changed since the beginning of the pandemic. Answers were rated  
8 on a 5-point Likert-type scale (clearly increased; rather increased; unchanged; rather decreased; clearly  
9 decreased). Finally, students were asked for free text responses regarding the question what currently  
10 is occupying them most in their current study situation and what they experience as particularly  
11 helpful.  
12  
13  
14  
15  
16  
17  
18  
19  
20

## 21 Stress

22  
23 In the second survey students' perception of stress was quantified with the Perceived Stress Scale (PSS-  
24 4). The 4-item self-report instrument with reverse coding for two items assesses on a five-point Likert  
25 scale the degree to which situations in one's life were perceived as stressful in the past month[35].  
26 Higher scores on the PSS-4 indicate higher stress levels.  
27  
28  
29  
30  
31  
32

## 33 Burdening aspects

34  
35 For the second data collection in July 2020, we developed six items based on the qualitative results  
36 from the first survey to assess burdening aspects experienced by the students' quantitatively. The  
37 respondents had the possibility to answer in four levels (1 = "not at all burdensome" to 4 = "very  
38 burdensome").  
39  
40  
41  
42  
43  
44

## 45 Data analysis

46  
47 We matched dental students to medical students according to age and gender in the ratio of 1:2 in  
48 order to harmonize the initially inhomogeneous sample sizes and enhance comparability of the  
49 samples. In May 2020, the final sample consisted of n=132 students (44 dental and 88 medical  
50 students). In July 2020, the sample comprised 150 students (50 dental and 100 medical students). With  
51 74% (t1) and 69% (t2) female students the gender ratio of the sample is comparable to the ratio of first  
52 year students at German medical schools[36]. We used descriptive statistics to characterize the  
53 sample. Group comparisons were carried out using  $\chi^2$ -tests for categorical variables and t-tests for  
54 differences of means.  
55  
56  
57  
58  
59  
60

1  
2  
3 We conducted descriptive analyses to examine the magnitude of distress (DT), depression and anxiety  
4 (PHQ-4), and stress (PSS-4). The results of the entire sample as well as of the subgroups (dental and  
5 medical students) were compared with PHQ-4 data of a German medical student sample (n=321, mean  
6 age=21.8 years, 60.7% women) from a previous study at the same faculty[8] with one-sample t-tests.  
7  
8 To examine the likelihood for serious worries (dichotomous) regarding the study situation during the  
9 COVID-19 pandemic at t1 we conducted a binary logistic regression model with sex, subject of study,  
10 the magnitude of distress, depression and anxiety as potential predictors. Non-significant variables  
11 were excluded via backward elimination and dropped at the level of  $p < 0.05$ . We applied likelihood  
12 ratio method, which is recommended for stepwise methods[37]. To avoid multicollinearity, we  
13 analyzed Variable Inflation Factors (VIF) scores. We conducted effect size calculations and considered  
14 according to Cohen's  $f^2 = .02$  to be a small effect,  $f^2 = .15$  as a medium effect, and  $f^2 = .35$  as a large  
15 effect[38]. All quantitative analyses were carried out using IBM SPSS version 27.

16  
17 We used conventional content analyses with inductive categorization to analyze the free text  
18 responses[39]. Two researchers familiarized themselves with the qualitative data (IH, JG). They  
19 identified key concepts and generated labels of codes for recurring themes independently. Next, both  
20 sorted codes into categories independently, which were reviewed by all authors. We developed final  
21 definitions for categories and codes with iterative consultations and discussions until consensus was  
22 achieved. We chose excerpts to exemplify each category and translated them into English. For the  
23 qualitative data analysis, we used MAXQDA 2020 (VERBI Software, 2019).

24  
25 Following the inductive categorization we recoded answers for each category into dichotomous  
26 variables (mentioned vs. not mentioned) to enhance data transparency and to provide evidence for  
27 our interpretation[40]. When students provided more than one category per response, all responses  
28 respectively categories were categorized. The qualitative results of the first survey served as the basis  
29 for developing six quantitative items for the second survey.

30  
31 The local ethics board of the Center for Psychosocial Medicine at the University Medical Center  
32 Hamburg-Eppendorf approved the study (LPEK-0161).

### 33 34 35 36 37 38 39 40 41 42 43 44 45 46 47 48 49 50 51 Patient and Public Involvement

52  
53 We did not involve patients in our study. Research questions were developed by the principle  
54 investigators (CB, JG) and discussed with the Curriculumkomitee iMED, Hamburg (CK iMED) in April  
55 2020. CK iMED is a committee consisting of students, teachers and a member of the dean's office,  
56 which has the task of further developing and optimizing the structure and content of the reformed  
57 medical degree program iMED. Subsequently all enrolled students were informed by e-mail about the  
58 design, conduct, the outcome measures and the recruitment and encouraged to give feedback. After  
59  
60

publication a summary of the results will be presented in plain language on the website of the University Medical Center Hamburg-Eppendorf.

## RESULTS

Of 68 first year dental students enrolled in the dental education program at the UKE in May 2020, 44 (65.3%) completed the first survey (t1) in May 2020 and were matched to 88 medical first year students who completed the t1 survey as described above (overall response rate of the medical students was 87.2%). The response rate of the second survey (t2) was 81% among first year dental students and 82% among first year medical students. With 75.0% (t1) and 70.0% (t2) female dental students and 39.7% (t1) and 40.0% (t2) aged 20 years and younger, both samples are similar to the population of first year dental students at the faculty. The demographic characteristics of the final samples are shown in Table1.

**Table 1:** Sample characteristics among dental and medical students participating in the first ( $n^1=132$ ) and second survey ( $n^2=150$ )

|                     | First Survey (May 2020) |                                         |                                          | Second Survey (July 2020) |                                         |                                           |
|---------------------|-------------------------|-----------------------------------------|------------------------------------------|---------------------------|-----------------------------------------|-------------------------------------------|
|                     | Whole sample<br>(n=132) | Dental students<br>(n <sub>1</sub> =44) | Medical students<br>(n <sub>1</sub> =88) | Whole sample<br>(n=150)   | Dental students<br>(n <sub>2</sub> =50) | Medical students<br>(n <sub>2</sub> =100) |
|                     | %                       | %                                       | %                                        | %                         | %                                       | %                                         |
| <b>sex:</b>         |                         |                                         |                                          |                           |                                         |                                           |
| male                | 25.8                    | 25.0                                    | 26.1                                     | 30.7                      | 30.0                                    | 31.0                                      |
| female              | 74.2                    | 75.0                                    | 73.9                                     | 69.3                      | 70.0                                    | 69.0                                      |
| <b>age:</b>         |                         |                                         |                                          |                           |                                         |                                           |
| Up to 20 years      | 38.6                    | 39.7                                    | 38.6                                     | 40.0                      | 40.0                                    | 40.0                                      |
| 21-25 years         | 34.1                    | 33.8                                    | 34.1                                     | 34.0                      | 34.0                                    | 34.0                                      |
| 26-30 years         | 18.2                    | 17.6                                    | 18.2                                     | 18.0                      | 18.0                                    | 18.0                                      |
| 31-35 years         | 6.8                     | 5.9                                     | 6.8                                      | 6.0                       | 6.0                                     | 6.0                                       |
| Older than 35 years | 2.3                     | 2.9                                     | 2.3                                      | 2.0                       | 2.0                                     | 2.0                                       |

### Distress, depression and anxiety

Overall, high levels of distress, anxiety and depression were found in both dental and medical students. Compared to a German reference sample [41] with an overall mean PHQ-4 score of 1.8 (SD=2.0) and of 1.5 (SD=2.0) for a student subsample, our samples reported on average significantly higher anxiety and depression (PHQ-4) scores at t1 and t2: In May 2020 79.5% of the dental students and 86.4% of the medical students reported moderate or severe distress scores and 25.0% of the dental students and 23.8% of the medical students reported moderate to severe anxiety and depression scores. In July

1  
2  
3 2020 dental students reported significantly higher levels of distress and anxiety than medical students  
4 (Table 2). With regard to gender differences, the scores of male and female students did overall not  
5 differ significantly in the whole sample at t1 and t2. However, female dental students (t1: M=4.7;  
6 SD=2.6; t2: M=4.6; SD=2.8) reported significantly higher PHQ-4 scores than male dental students (t1:  
7 M=2.8; SD= 1.5; t2: M=2.9; SD= 2.6) at t1 ( $t(42) = -2.2, p = .031$ ) and t2 ( $t(48) = -2.1, p = .043$ ).  
8  
9

10  
11  
12 In July 2020 (t2), dental students reported significantly higher scores of distress and anxiety than  
13 medical students, while both groups were comparable with regard to their overall anxiety and  
14 depression symptom burden (24.0% with moderate or severe symptoms in dental students, 19.0% in  
15 medical students). With regard to self-perceived stress (only assessed in the second survey), dental  
16 students reported higher stress levels than medical students (Table 2).  
17  
18  
19  
20  
21  
22  
23  
24  
25  
26  
27  
28  
29  
30  
31  
32  
33  
34  
35  
36  
37  
38  
39  
40  
41  
42  
43  
44  
45  
46  
47  
48  
49  
50  
51  
52  
53  
54  
55  
56  
57  
58  
59  
60

**Table 2:** Amount of self-reported distress, depression and anxiety and stress among dental and medical students in May 2020 (n<sup>1</sup>=132) and July 2020 (n<sup>2</sup>=150)

|                                                   | May 2020     |                        |                         |                  |     |      | July 2020    |                        |                          |                  |     |       |
|---------------------------------------------------|--------------|------------------------|-------------------------|------------------|-----|------|--------------|------------------------|--------------------------|------------------|-----|-------|
|                                                   | Whole sample | Dental students (n=44) | Medical students (n=88) | t                | df  | p    | Whole sample | Dental students (n=50) | Medical students (n=100) | t                | df  | p     |
|                                                   | M (SD)       | M (SD)                 | M (SD)                  |                  |     |      | M (SD)       | M (SD)                 | M (SD)                   |                  |     |       |
| <b>Distress (range: 0-10)</b>                     | 6.4 (2.4)    | 6.3 (2.5)              | 6.5 (2.4)               | 0.31             | 130 | .757 | 6.1 (2.2)    | 7.0 (2.3)              | 5.7 (2.1)                | -3.57            | 148 | <.001 |
| <b>Anxiety and depression (PHQ-4; range 0-12)</b> | 3.9 (2.5)    | 4.2 (2.5)              | 3.8 (2.5)               | 0.82             | 130 | .417 | 3.7 (2.7)    | 4.1 (2.8)              | 3.6 (2.6)                | 1.13             | 148 | .262  |
| <b>Anxiety (GAD-2; range 0-6)</b>                 | 1.9 (1.5)    | 2.1 (1.5)              | 1.9 (1.5)               | 0.79             | 130 | .435 | 1.9 (1.6)    | 2.3 (1.8)              | 1.7 (1.4)                | 2.03             | 148 | .045  |
| <b>Depression (PHQ-2; range 0-6)</b>              | 2.0 (1.3)    | 2.1 (1.3)              | 1.9 (1.3)               | 0.66             | 130 | .513 | 1.8 (1.4)    | 1.8 (1.3)              | 1.8 (1.4)                | -0.13            | 148 | .898  |
| <b>Self-perceived Stress (PSS-4; range 0-16)</b>  | -            | -                      | -                       | -                | -   | -    | 5.6 (3.1)    | 6.1 (3.2)              | 5.3 (2.9)                | 1.53             | 148 | .128  |
| <b>Anxiety and depression symptoms (PHQ4)</b>     | %            | %                      | %                       | chi <sup>2</sup> | df  | p    | %            | %                      | %                        | chi <sup>2</sup> | df  | p     |
| <b>normal (0-2)</b>                               | 31.8         | 25.0                   | 35.2                    | 1.54             | 3   | .674 | 38.0         | 36.0                   | 39.0                     | 0.56             | 3   | .906  |
| <b>mild (3-5)</b>                                 | 43.9         | 50.0                   | 40.9                    |                  |     |      | 41.3         | 40.0                   | 42.0                     |                  |     |       |
| <b>moderate (6-8)</b>                             | 19.7         | 20.5                   | 19.3                    |                  |     |      | 13.3         | 16.0                   | 12.0                     |                  |     |       |
| <b>severe (9-12)</b>                              | 4.5          | 4.5                    | 4.5                     |                  |     |      | 7.3          | 8.0                    | 7.0                      |                  |     |       |
| <b>Distress by category</b>                       | %            | %                      | %                       | chi <sup>2</sup> | df  | p    | %            | %                      | %                        | chi <sup>2</sup> | df  | p     |
| <b>Normal (0-4)</b>                               | 15.9         | 20.5                   | 13.6                    | 1.02             | 2   | .600 | 22.7         | 16.0                   | 26.0                     | 9.65             | 2   | .008  |
| <b>Moderate (5-7)</b>                             | 50.8         | 47.7                   | 52.3                    |                  |     |      | 49.3         | 40.0                   | 54.0                     |                  |     |       |
| <b>Severe (8-10)</b>                              | 33.3         | 31.8                   | 34.1                    |                  |     |      | 28.0         | 44.0                   | 20.0                     |                  |     |       |
| <b>Over cutoff (≥5)</b>                           | 84.1         | 79.5                   | 86.4                    | 1.02             | 1   | .313 | 77.3         | 84.0                   | 74.0                     | 1.90             | 1   | .168  |

Note. n=number; M = mean; SD = standard deviation; df = degrees of freedom; p = p-value, significance level p<.05

### Changes in mental health and perception of the study situation

Overall, about one third of the students (36.4% dental students vs. 29.5% medical students) reported that their mental health had worsened because of the pandemic at t1. Likewise, a total of 35.6% (45.5% dental vs. 30.7% medical students) reported a decrease in their study motivation at t1 and 36.7% at t2 (36.0% dental vs. 37.0% medical students). With regard to worries about the current study situation more medical students (t1: 46.4%; t2: 47.5%) than dental students (t1: 31.8%; t2: 34.7%) reported to be unperturbed and slightly more dental than medical students were seriously worried at t1 (18.2% vs. 6.0%) and at t2 (14.3% vs. 10.1%). However, in both surveys dental and medical students did not differ statistically significant regarding their self-reported changes of mental health, study motivation or worries about the current study situation (Table 3). Likewise, we did not find statistically significant differences between male and female students.

**Table 3:** Perception of current study situation, changes of self-reported mental health caused by the COVID-19 pandemic and changes of study motivation of dental and medical students in May 2020 (n<sup>1</sup>=132) and July 2020 (n<sup>2</sup>=150)

| May 2020                                                                                |                          |                        |                            |                  |    |      | July 2020                |                                        |                                          |                        |           |             |
|-----------------------------------------------------------------------------------------|--------------------------|------------------------|----------------------------|------------------|----|------|--------------------------|----------------------------------------|------------------------------------------|------------------------|-----------|-------------|
| Worries about current study situation                                                   | Whole sample (129<n<132) | Dental students (n=44) | Medical students (84<n>88) | chi <sup>2</sup> | df | p    | Whole sample (148<n<150) | Dental students (49<n>50)              | Medical students (99<n>100)              | chi <sup>2</sup>       | df        | p           |
|                                                                                         | %                        | %                      | %                          |                  |    |      | %                        | %                                      | %                                        |                        |           |             |
| Not worried                                                                             | 41.4                     | 31.8                   | 46.4                       | 5.77             | 2  | .056 | 43.2                     | 34.7                                   | 47.5                                     | 2.27                   | 2         | .321        |
| Somewhat worried                                                                        | 48.4                     | 50.0                   | 47.6                       |                  |    |      | 45.3                     | 51.0                                   | 42.4                                     |                        |           |             |
| Seriously worried                                                                       | 10.2                     | 18.2                   | 6.0                        |                  |    |      | 11.5                     | 14.3                                   | 10.1                                     |                        |           |             |
| <b>Self-reported changes of mental health caused by the COVID-19 pandemic</b>           |                          |                        |                            |                  |    |      |                          |                                        |                                          |                        |           |             |
| improved                                                                                | 19.7                     | 22.7                   | 18.2                       | 1.52             | 2  | .468 | Not asked.               |                                        |                                          |                        |           |             |
| unchanged                                                                               | 48.5                     | 40.9                   | 52.3                       |                  |    |      |                          |                                        |                                          |                        |           |             |
| worsened                                                                                | 31.8                     | 36.4                   | 29.5                       |                  |    |      |                          |                                        |                                          |                        |           |             |
| <b>Self-reported changes of study motivation</b>                                        |                          |                        |                            |                  |    |      |                          |                                        |                                          |                        |           |             |
| increased                                                                               | 13.6                     | 11.4                   | 14.8                       | 2.79             | 2  | .247 | 16.0                     | 16.0                                   | 16.0                                     | 0.02                   | 2         | .992        |
| unchanged                                                                               | 50.8                     | 43.2                   | 54.5                       |                  |    |      | 47.3                     | 48.0                                   | 47.0                                     |                        |           |             |
| decreased                                                                               | 35.6                     | 45.5                   | 30.7                       |                  |    |      | 36.7                     | 36.0                                   | 37.0                                     |                        |           |             |
| <b>Burdening aspects<sup>1</sup></b>                                                    | Not asked                |                        |                            |                  |    |      | <b>Whole sample</b>      | <b>Dental students (49&lt;n&gt;50)</b> | <b>Medical students (99&lt;n&gt;100)</b> | <b>chi<sup>2</sup></b> | <b>df</b> | <b>p</b>    |
| Preparation for (final) exams                                                           | -                        | -                      | -                          | -                | -  | -    | 63.3                     | 76.0                                   | 57.0                                     | 5.18                   | 1         | <b>.023</b> |
| Lack of practical training                                                              | -                        | -                      | -                          | -                | -  | -    | 43.3                     | 52.0                                   | 39.0                                     | 2.29                   | 1         | .130        |
| Few social contacts (private)                                                           | -                        | -                      | -                          | -                | -  | -    | 43.3                     | 34.0                                   | 48.0                                     | 2.66                   | 1         | .103        |
| Lack of interaction with fellow students                                                | -                        | -                      | -                          | -                | -  | -    | 56.0                     | 52.0                                   | 58.0                                     | 0.49                   | 1         | .485        |
| Concomitants of the CoViD-19 pandemic (contact restrictions, mandatory facemasks, etc.) | -                        | -                      | -                          | -                | -  | -    | 22.0                     | 24.0                                   | 21.0                                     | 0.18                   | 1         | .676        |
| General uncertainty                                                                     | -                        | -                      | -                          | -                | -  | -    | 36.0                     | 54.0                                   | 27.0                                     | 10.55                  | 1         | <b>.001</b> |

1  
2  
3 Note: n=number; M = mean; SD = standard deviation; df = degrees of freedom;  $p$  =  $p$ -value, significance level  $p < .05$

4 <sup>1</sup>dichotomized: burdened (s. Table above) including “somewhat burdensome” and “very burdensome” vs. not burdened including “not at all burdensome” and  
5 “a little burdensome”  
6  
7  
8  
9  
10  
11  
12  
13  
14  
15  
16  
17  
18  
19  
20  
21  
22  
23  
24  
25  
26  
27  
28  
29  
30  
31  
32  
33  
34  
35  
36  
37  
38  
39  
40  
41  
42  
43  
44  
45  
46

For peer review only



### Burdening aspects

Many of students felt burdened due to the lack of interaction with fellow students. In comparison to medical students, significantly more dental students stated that they were burdened with regard to the exams and the general uncertainty (Table 3).

Binary logistic regression indicated that medical students were significantly more likely to experience serious worries regarding the current study situation during COVID-19 than dental students at t1. At t2 higher distress was associated with a higher likelihood for reporting serious worries regarding the current study situation during COVID-19 (Table 4).

**Table 4:** Binary logistic regression models on the association of study subject, depression and distress with serious worries in dental and medical students during the COVID-19 pandemic.

| May 2020                    | Odds ratio (OR) | 95% confidence interval (CI) | p           | effect size <sup>1</sup> |
|-----------------------------|-----------------|------------------------------|-------------|--------------------------|
| Subject of study            |                 |                              |             |                          |
| dental                      | 4.0             |                              | n.a.        | .032                     |
| medical                     | Reference       | 1.1 – 14.2                   | <b>.031</b> |                          |
| Distress (DT)               | 1.4             | 0.9 -1.9                     | .078        |                          |
| Depression symptoms (PHQ-2) | 1.5             | 0.9 - 2.6                    | .091        |                          |
| <b>July 2020</b>            |                 |                              |             |                          |
| Distress (DT)               | 1.8             | 1.3 – 2.5                    | <b>.001</b> | 0.24                     |

<sup>1</sup>According to Cohen's guidelines (1988) we considered  $f^2 = .02$  to be a small effect,  $f^2 = .15$  as a medium effect, and  $f^2 = .35$  as a large effect.

### Current concerns and helpful aspects

A total of 52 students (39.4%) provided optional free-text responses regarding the question "What is currently occupying you most in your current study situation?". We identified five categories in a multistage inductive process. The most frequent categories were "difficulties with self-regulated learning and self-motivation", followed by "study-related worries and uncertainty", "lack of feedback from other students and lecturers" and "lack of practical training". Significantly more dental (20.5%) than medical students (4.5%) reported concerns about the lack of practical training ( $\chi^2 = 8.4$ ;  $df = 1$ ;  $p = .004$ ) (Table 5).

**Table 5:** Categories, examples and quantified responses by category for the questions “What is currently occupying you most in your current study situation?” in May 2020 (n=132)

| What is currently occupying you most?                                                                                                                                                         |                                                                                                                                                                                                                                                                                                                                                                                                                                                                                               | Whole sample (n=132) mentioned | Dental students (n=44) mentioned | Medical students (n=88) mentioned |                  |    |      |
|-----------------------------------------------------------------------------------------------------------------------------------------------------------------------------------------------|-----------------------------------------------------------------------------------------------------------------------------------------------------------------------------------------------------------------------------------------------------------------------------------------------------------------------------------------------------------------------------------------------------------------------------------------------------------------------------------------------|--------------------------------|----------------------------------|-----------------------------------|------------------|----|------|
| Category and subcategory                                                                                                                                                                      | Example                                                                                                                                                                                                                                                                                                                                                                                                                                                                                       | %                              | %                                | %                                 | Chi <sup>2</sup> | df | p    |
| <b>Difficulties with self-regulated learning</b><br>(n = 20; 15.2%) <ul style="list-style-type: none"> <li>• Self-Motivation</li> <li>• Difficulties with new learning environment</li> </ul> | <p>"Self-motivation- the exchange with fellow students and lecturers is missing, and therefore one has to motivate oneself every day anew to sit down at home (the library as a room for studying is also missing) and to motivate oneself to nevertheless 'attend' all study courses in time and to catch up on the study-work."</p> <p>"Since I don't have the proper learning environment at home, I found it difficult to learn the very extensive content in an appropriate manner."</p> | 15.2                           | 15.9                             | 14.8                              | 0.03             | 1  | .864 |
| <b>Study-related worries and uncertainty</b><br>(n = 19; 14.4%) <ul style="list-style-type: none"> <li>• Concerns to perform worse/ to fail</li> <li>• Study-related uncertainty</li> </ul>   | <p>"Extreme pressure to teach myself the mass of content in a short time through e-learning in order to succeed on the exam."</p> <p>"The uncertainty of if and when face-to-face classes can be held again, and if potentially my study time will be extended due to this pandemic."</p>                                                                                                                                                                                                     | 14.4                           | 20.5                             | 11.4                              | 1.97             | 1  | .161 |

|                                                                              |                                                                                                        |      |      |      |      |   |             |
|------------------------------------------------------------------------------|--------------------------------------------------------------------------------------------------------|------|------|------|------|---|-------------|
| <b>Lack of feedback from other students and lecturers</b><br>(n = 15; 11.4%) | "Due to the online format, the exchange with fellow students and the lecturers is missing. (...).“     | 11.4 | 11.4 | 11.4 | 0.00 | 1 | 1.000       |
| <b>Lack of practical training</b><br>(n = 13; 9.8%)                          | "The practical components in dental education are essential and (...) are now being cancelled. (...).“ | 9.8  | 20.5 | 4.5  | 8.36 | 1 | <b>.004</b> |
| <b>Other</b><br>(n = 9; 6.8%)                                                | "Lack of available childcare. Learning with (...) children at home is a challenge."                    | 6.8  | 11.4 | 4.5  | 2.15 | 1 | .143        |

Note: n=number; df = degrees of freedom; *p* = *p*-value, significance level *p*<.05

For peer review only

1  
2  
3  
4  
5  
6  
7  
8  
9  
10  
11  
12  
13  
14  
15  
16  
17  
18  
19  
20  
21  
22  
23  
24  
25  
26  
27  
28  
29  
30  
31  
32  
33  
34  
35  
36  
37  
38  
39  
40  
41  
42  
43  
44  
45  
46

1  
2  
3 Furthermore, 53 students (40.2%) completed optional free-text responses to the question "What do  
4 you currently experience as particularly helpful?". Again five categories were identified through a  
5 multi-step inductive process. The most common categories were "Exchange with other students and  
6 lecturers", followed by "flexibility due to online lessons", "self-regulation, -motivation and -  
7 structuring", and "balance through sports and leisure". Dental and medical students did not differ  
8 significantly in their answers with regard to helpful aspects (Table 6).  
9  
10  
11  
12  
13  
14  
15  
16  
17  
18  
19  
20  
21  
22  
23  
24  
25  
26  
27  
28  
29  
30  
31  
32  
33  
34  
35  
36  
37  
38  
39  
40  
41  
42  
43  
44  
45  
46  
47  
48  
49  
50  
51  
52  
53  
54  
55  
56  
57  
58  
59  
60

**Table 6:** Categories, examples and quantified responses by category for the questions “What do you currently experience as particularly helpful?” in May 2020 (n=132)

| What do you currently experience as particularly helpful?      |                                                                                                                                                                                | Whole sample<br>(n=132)<br>mentioned | Dental students<br>(n=44)<br>mentioned | Medical students<br>(n=88)<br>mentioned |                  |    |          |
|----------------------------------------------------------------|--------------------------------------------------------------------------------------------------------------------------------------------------------------------------------|--------------------------------------|----------------------------------------|-----------------------------------------|------------------|----|----------|
| Category                                                       | Example                                                                                                                                                                        | %                                    | %                                      | %                                       | Chi <sup>2</sup> | df | <i>p</i> |
| <b>Exchange with students and lecturers</b><br>(n = 18; 13.6%) | "Intensive exchange with fellow students and lecturers."                                                                                                                       | 13.6                                 | 15.9                                   | 12.5                                    | 0.29             | 1  | .591     |
| <b>Flexibility due to online lessons</b><br>(n = 17; 12.9%)    | "The online semester also brings many advantages. You can arrange everything yourself and work at your own pace. This also takes away a lot of stress for me personally (...)" | 12.9                                 | 15.9                                   | 11.4                                    | 0.54             | 1  | .462     |
| <b>Structure and self-discipline</b><br>(n = 13; 9.8%)         | "Studying online to regain routine in everyday life."                                                                                                                          | 9.8                                  | 11.4                                   | 9.1                                     | 0.17             | 1  | .680     |
| <b>Balance through sports and leisure</b><br>(n = 11; 8.3%)    | "The fact that I can do my team sports again, that gives me enough variety and distraction "                                                                                   | 8.3                                  | 11.4                                   | 6.8                                     | 0.79             | 1  | .373     |
| <b>Other</b><br>(n = 9; 6.8%)                                  | "Encouragement of friends and family"                                                                                                                                          | 6.8                                  | 9.1                                    | 5.7                                     | 0.54             | 1  | .464     |

Note: n=number; df = degrees of freedom; *p* = *p*-value, significance level *p*<.05

1  
2  
3  
4  
5  
6  
7  
8  
9  
10  
11  
12  
13  
14  
15  
16  
17  
18  
19  
20  
21  
22  
23  
24  
25  
26  
27  
28  
29  
30  
31  
32  
33  
34  
35  
36  
37  
38  
39  
40  
41  
42  
43  
44  
45  
46

For peer review only

## DISCUSSION

This study investigated the mental burden and study situation among undergraduate dental and medical students after the initial stage of the COVID-19 pandemic from May 2020 to July 2020. In line with previous studies conducted before the pandemic dental and medical students reported high levels of distress, anxiety and depression[8, 12, 42]. Compared to the norm population students of both professions reported significantly higher levels of anxiety and depression, consistent with findings of other studies[8, 43]. In light of the COVID-19 pandemic, the presence of additional pandemic specific stressors is likely[22]. A recent study showed that for most students isolation from student social networks is associated with increased anxiety levels[24]. According to our qualitative data, the lack of direct contact with fellow students, which could only take place via online media, affects both student professions negatively. For dental students, the lack of practical training played a major role, as dentists usually take dental courses from the first semester onwards to learn the practical skills from early stage on[44]. In comparison, this issue does not yet affect medical students as much in the early stages of their studies, as the undergraduate medical curriculum in Germany includes fewer practical training during this time[45]. In sum this probably accounts for our findings that reported levels of anxiety and depression are even higher than among students of the same medical school prior to the Corona pandemic[8].

With regard to the study situation, medical and in particular dental students were concerned about their current study situation. This trend continued in the further course of the pandemic. These results corroborate recent findings in a representative sample in Austria with a notable decline in mental health during the pandemic[46].

In line with the findings of Stangvaltaite-Mouhat et al. (2020) female dental students showed more pronounced anxiety symptoms than male dental students in our study[11]. This underlines that mental burden may be higher among female students in general[47]. Recent studies also suggest that women are particular burdened during the COVID-19 pandemic[46, 48, 49, 50, 51]. Furthermore several studies showed that certain age groups, including individuals between 18 and 25 years old - the most common age group in students - suffered more from mental distress[46, 48, 50, 52]. Qiu et al. (2020) suspect social media to be one of the causes[48]. Previous research seems to confirm this hypothesis as younger people tend to receive a large amount of information via social media, which can easily trigger stress[53]. The easy accessibility and constant presence of pandemic information may lead to an increase in the duration of information consumption. This increasing duration reinforces the potential negative influence on mental health[54]. A noteworthy finding is that dental students reported increased levels of distress, anxiety and more worries in the second survey whereas medical students' scores were slightly lower at the second survey.

1  
2  
3 There are some limitations of our study. The cross-sectional surveys at two different times do not allow  
4 causal statements about longitudinal developments. The small sample size limits representativeness.  
5 However, due to the high response rates (65-87% in the first and 81-82% in the second survey) one  
6 may assume that a majority of the respondents participated in both surveys. Thus, these single-  
7 institutional and cross-sectional surveys achieve a high level of comparability and representativeness.  
8 Still there was a considerable proportion of students that did not participate in the surveys, which  
9 might lead to a volunteer bias[55]. Nonvolunteers may encompass students who suffer from high  
10 levels of distress, anxiety and/or depression. Thus some of the parameters reported in the study may  
11 be underestimating the true burden.  
12

13  
14 Furthermore, no comparisons can be made with the situation before the outbreak of the pandemic,  
15 among the same population. Nevertheless, the study by Heinen et al. (2017) conducted at the same  
16 medical school with the same measures serves as a valid context to frame our findings[8].  
17

18  
19 Considering the worsened levels of psychological distress among students during the COVID-19  
20 pandemic [56, 57] academic institutions should provide timely services in terms of tailored  
21 interventions, which address the specific worries of dental and medical students. Other authors  
22 already provided valuable and concrete recommendations how to reduce the impact of COVID-19 on  
23 student-athlete mental health [58, 59]. Grubic et al. (2021) proposed a framework to manage student-  
24 athlete mental health during the pandemic including “goal setting/motivation” and “support  
25 system/social network” as potential positive influencers. These aspects could be addressed by medical  
26 schools in the form of mentoring. Mentoring was identified as valuable intervention for undergraduate  
27 medical students due to its association with improved emotional well-being of students before the  
28 pandemic[60]. During the pandemic a novel near-peer mentoring intervention via social media was  
29 reported with promising first results[61]. Thus, the implementation of mentoring at medical schools  
30 or the transfer of existing mentoring interventions digital formats might help to reduce the negative  
31 impact of the COVID-19 pandemic on dental and medical students. At the same time longitudinal  
32 research is needed to monitor the mental health of students during the pandemic and after as well as  
33 rigor evaluation of all interventions.  
34  
35

## 36 Conclusion

37  
38 Overall students of medicine and dentistry are particularly affected by high mental distress and burden  
39 due to the demanding contents and structure of their studies. It is likely that the concomitant  
40 symptoms of the pandemic have an additional negative impact on the levels of stress, anxiety and  
41 depression of the students.  
42

43  
44 Especially dental students reported higher levels of burden which might be associated with the high  
45 practical content early in their studies. The increase in anxiety levels of dental students might be  
46



1  
2  
3 associated with the duration of the restrictions of especially the practical content during the  
4 undergraduate study. Against this background, further monitoring of both dental and medical students  
5 during the pandemic would be important in order to develop and introduce tailored prevention  
6 concepts adapted to the specific study situation.  
7  
8  
9

10  
11  
12 **Acknowledgements:** We would like to thank all students who participated in the study and the  
13 evaluation team of the faculty who administered the online survey.  
14  
15  
16

17  
18 **Author contributions:** JG designed the study and contributed to the analysis and interpretation of the  
19 data. She critically revised the manuscript during the internal revision process and wrote continuing  
20 drafts as well as the final draft of the manuscript. ASW analyzed the data and contributed to the  
21 interpretation of the data. She wrote the first draft of the manuscript and critically revised the  
22 manuscript during the internal revision process. IH contributed to the analysis and interpretation of  
23 the data. She was involved in drafting the article and critically revised the manuscript during the  
24 internal revision process. CB designed the study, analyzed the data and contributed to the  
25 interpretation of the data. She wrote the first draft of the manuscript and critically revised the  
26 manuscript during the internal revision process. All authors gave their final approval of the version to  
27 be published and agree to be accountable for all aspects of the work in ensuring that questions related  
28 to the accuracy or integrity of any part of the work are appropriately investigated and resolved.  
29  
30  
31  
32  
33  
34  
35  
36  
37  
38

39 **Funding:** This research received no specific grant from any funding agency in the public, commercial  
40 or not-for-profit sectors  
41

42 **Competing interests:** The authors declare that they have no competing interests.  
43

44 **Patient consent form:** Not required.  
45

46  
47 **Ethics approval:** Institutional ethical approval was obtained from the local ethics board of the Center  
48 for Psychosocial Medicine at the University Medical Center Hamburg-Eppendorf, approval number  
49 LPEK-0161, prior to commencement of this research. Only students who provided informed consent  
50 were able to participate in the study.  
51  
52  
53

54 **Data availability statement:** As ethical approval was not obtained to make data sharing possible  
55 outside of the listed research team, no additional data are available.  
56  
57  
58  
59

## 60 **References**

- 1  
2  
3 1. Vindegaard N, Benros ME. COVID-19 pandemic and mental health consequences: Systematic review  
4 of the current evidence. *Brain Behav Immun* 2020;89:531-42.
- 5  
6 2. Empfehlungen II der Deutschen Hochschulmedizin zum Studium der Humanmedizin und Zahnmedizin  
7 während der aktuellen COVID-19-Pandemie, 18.03.2020.: Verband der Universitätsklinika  
8 Deutschlands und MFT Medizinischer Fakultätentag; 2020.  
9  
10 [https://www.uniklinika.de/fileadmin/user\\_upload/Covid-19-](https://www.uniklinika.de/fileadmin/user_upload/Covid-19-Empfehlungen_DHM_zum_Medizinstudium_2020-03-18.pdf)  
11 [Empfehlungen\\_DHM\\_zum\\_Medizinstudium\\_2020-03-18.pdf](https://www.uniklinika.de/fileadmin/user_upload/Covid-19-Empfehlungen_DHM_zum_Medizinstudium_2020-03-18.pdf) (accessed 8 Jun 2020).
- 12  
13 3. Whelan A, Prescott J, Young G, Catanese VM. Guidance on Medical Students' Clinical Participation:  
14 Effective Immediately.: Association of American Academic Colleges.; 2020 [updated March 17, 2020].  
15 [https://lcme.org/wp-content/uploads/filebase/March-17-2020-Guidance-on-Mediical-Students-](https://lcme.org/wp-content/uploads/filebase/March-17-2020-Guidance-on-Mediical-Students-Clinical-Participation.pdf)  
16 [Clinical-Participation.pdf](https://lcme.org/wp-content/uploads/filebase/March-17-2020-Guidance-on-Mediical-Students-Clinical-Participation.pdf). (accessed 8 Jun 2020).
- 17  
18 4. Guse J, Heinen I, Kurre J, Mohr S, Bergelt C. Perception of the study situation and mental burden during  
19 the COVID-19 pandemic among undergraduate medical students with and without mentoring. *GMS J*  
20 *Med Educ* 2020;37(7):Doc72.
- 21  
22 5. Miller DG, Pierson L, Doernberg S. The Role of Medical Students During the COVID-19 Pandemic. *Ann*  
23 *Intern Med*. 2020; Menon A, Klein EJ, Kollars K, Kleinhenz ALW. Medical Students Are Not Essential  
24 Workers: Examining Institutional Responsibility During the COVID-19 Pandemic. *Acad Med*  
25 2020;95(8):1149-51.
- 26  
27 6. Schwenk TL, Davis L, Wimsatt LA. Depression, stigma, and suicidal ideation in medical students. *JAMA*.  
28 2010;304(11):1181-90; Bacchi S, Licinio J. Resilience and Psychological Distress in Psychology and  
29 Medical Students. *Acad Psychiatry* 2017;41(2):185-8.
- 30  
31 7. Hope V, Henderson M. Medical student depression, anxiety and distress outside North America: a  
32 systematic review. *Med Educ* 2014;48(10):963-79.
- 33  
34 8. Heinen I, Bullinger M, Kocalevent RD. Perceived stress in first year medical students - associations with  
35 personal resources and emotional distress. *BMC Med Educ* 2017;17(1):4.
- 36  
37 9. Knipe D, Maughan C, Gilbert J, Dymock D, Moran P, Gunnell D. Mental health in medical, dentistry and  
38 veterinary students: cross-sectional online survey. *BJPsych Open* 2018;4(6):441-6.
- 39  
40 10. Puthran R, Zhang MW, Tam WW, Ho RC. Prevalence of depression amongst medical students: a meta-  
41 analysis. *Med Educ* 2016;50(4):456-68.
- 42  
43 11. Stangvaltaite-Mouhat L, Puriene A, Chalas R et al. Self-reported psychological problems amongst  
44 undergraduate dental students: A pilot study in seven European countries. *Eur J Dent Educ*  
45 2020;24(2):341-50.
- 46  
47 12. Basudan S, Binanzan N, Alhassan A. Depression, anxiety and stress in dental students. *Int J Med Educ*  
48 2017;8:179-86.
- 49  
50  
51  
52  
53  
54  
55  
56  
57  
58  
59  
60

13. Bathla M, Singh M, Kulhara P et al. Evaluation of anxiety, depression and suicidal intent in undergraduate dental students: A cross-sectional study. *Contemp Clin Dent* 2015;6(2):215-22.
14. Jurkat H, Hofer S, Richter L et al. [Quality of life, stress management and health promotion in medical and dental students. A comparative study]. *Dtsch Med Wochenschr* 2011;136(23):1245-50.
15. Harris RC, Millichamp CJ, Thomson WM. Stress and coping in fourth-year medical and dental students. *N Z Dent J* 2015;111(3):102-8.
16. Astill S, Ricketts N, Singh LA et al. Environmental and perceived stress in Australian dental undergraduates: Preliminary outcomes. *J Dent Res Dent Clin Dent Prospects* 2016;10(4):270-9.
17. Petzold MB, Plag J, Ströhle A. Dealing with psychological distress by healthcare professionals during the COVID-19 pandemic. *Der Nervenarzt* 2020;91(5):417-21.
18. Hawryluck L, Gold WL, Robinson S et al. SARS control and psychological effects of quarantine, Toronto, Canada. *Emerg Infect Dis* 2004;10(7):1206-12.
19. Wang C, Pan R, Wan X et al. Immediate Psychological Responses and Associated Factors during the Initial Stage of the 2019 Coronavirus Disease (COVID-19) Epidemic among the General Population in China. *Int J Environ Res Public Health* 2020;17(5).
20. Lai J, Ma S, Wang Y et al. Factors Associated With Mental Health Outcomes Among Health Care Workers Exposed to Coronavirus Disease 2019. *JAMA Netw Open*. 2020;3(3):e203976.
21. Bao Y, Sun Y, Meng S et al. 2019-nCoV epidemic: address mental health care to empower society. *Lancet* 2020;395(10224):e37-e8.
22. Inter-Agency Standing Committee (IASC). IASC Guidance on Operational considerations for Multisectoral Mental Health and Psychosocial Support Programmes during the COVID-19 Pandemic IASC Guidance on Operational considerations for Multisectoral MHPSS Programmes during the COVID-19 Pandemic.pdf [updated 25 Jun 2020] (accessed 18 Mar 2020).
23. Odriozola-González P, Planchuelo-Gómez Á, Irujo A et al. Psychological effects of the COVID-19 outbreak and lockdown among students and workers of a Spanish university. *Psychiatry Research* 2020;290:113108.
24. Elmer T, Mepham K, Stadtfeld C. Students under lockdown: Comparisons of students' social networks and mental health before and during the COVID-19 crisis in Switzerland. *PLoS One* 2020;15(7):e0236337.
25. Li Y, Wang Y, Jiang J et al. Psychological distress among health professional students during the COVID-19 outbreak. *Psychological Medicine* 2020:1-3.
26. O'Byrne L, Gavin B, McNicholas F. Medical students and COVID-19: the need for pandemic preparedness. *J Med Ethics* 2020;46(9):623-6.
27. [dataset] Steinmetz, H., Batzdorfer, V., Bosnjak, M. Data from: The ZPID lockdown measures dataset. ZPID Science Information Online, 20(1). 8 June 2020. <http://dx.doi.org/10.23668/psycharchives.3019>.

- 1  
2  
3 28. <https://www.hrk.de/activities/the-covid-19-pandemic-and-the-german-universities/> [website].  
4 Berlin: HRK German Rectors' Conference (updated 2020 July 28, accessed 29 Jul 2020).  
5  
6 29. Rose S. Medical Student Education in the Time of COVID-19. *JAMA*. 2020.  
7  
8 30. Gerhard-Szep S, Güntsch A, Pospiech P et al. Assessment formats in dental medicine: An overview.  
9 *GMS J Med Educ* 2016;33(4):Doc65.  
10  
11 31. Rheingans A, Soulos A, Mohr S, Meyer J, Guse AH. The Hamburg integrated medical degree program  
12 iMED. *GMS J Med Educ* 2019;36(5):Doc52.  
13  
14 32. Mehnert A, Müller D, Lehmann C, Koch U. Die deutsche Version des NCCN Distress-Thermometers.  
15 *Zeitschrift für Psychiatrie, Psychologie und Psychotherapie* 2006;54(3):213-23.  
16  
17 33. Kroenke K, Spitzer RL, Williams JB, Lowe B. An ultra-brief screening scale for anxiety and depression:  
18 the PHQ-4. *Psychosomatics*. 2009;50(6):613-21.  
19  
20 34. Khubchandani J, Brey R, Kotecki J, Kleinfelder J, Anderson J. The Psychometric Properties of PHQ-4  
21 Depression and Anxiety Screening Scale Among College Students. *Archives of Psychiatric Nursing*  
22 2016;30(4):457-62.  
23  
24 35. Cohen S, Kamarck T, Mermelstein R. A global measure of perceived stress. *J Health Soc Behav*  
25 1983;24(4):385-96.  
26  
27 36. Studierende: Deutschland, Semester, Nationalität, Geschlecht, Studienfach [website]. <https://www-genesis.destatis.de/genesis/online?operation=previous&levelindex=1&step=1&titel=Ergebnis&levelid=1616753759559&acceptcookies=false#abreadcrumb> (accessed 26 Mar 2021).  
28  
29  
30  
31  
32  
33  
34  
35 37. Field A. *Discovering statistics using IBM SPSS statistics : and sex and drugs and rock 'n' roll*. 4. ed. Los  
36 Angeles [i.a.]: Sage; 2013.  
37  
38 38. Cohen J. *Statistical power analysis for the behavioral sciences*. 2. ed. Hillsdale, NJ [i.a.]: Erlbaum; 1988.  
39  
40 39. Hsieh HF, Shannon SE. Three approaches to qualitative content analysis. *Qualitative health research*  
41 2005;15(9):1277-88.  
42  
43 40. Monrouxe LV, Rees CE. When I say ... quantification in qualitative research. *Med Educ* 2020;54(3):186-  
44 7.  
45  
46 41. Löwe B, Wahl I, Rose M et al. A 4-item measure of depression and anxiety: validation and  
47 standardization of the Patient Health Questionnaire-4 (PHQ-4) in the general population. *J Affect*  
48 *Disord* 2010;122(1-2):86-95.  
49  
50 42. Jiménez-Ortiz JL, Islas-Valle RM, Jiménez-Ortiz JD, Pérez-Lizárraga E, Hernández-García ME, González-  
51 Salazar F. Emotional exhaustion, burnout, and perceived stress in dental students. *Journal of*  
52 *International Medical Research* 2019;47(9):4251-9.  
53  
54 43. Stormon N, Ford PJ, Kisely S, Bartle E, Eley DS. Depression, anxiety and stress in a cohort of Australian  
55 dentistry students. *Eur J Dent Educ* 2019;23(4):507-14.  
56  
57  
58  
59  
60

- 1  
2  
3 44. Mekhemar M, Conrad J, Attia S, Dörfer C. Oral Health Attitudes among Preclinical and Clinical Dental  
4 Students in Germany. *International journal of environmental research and public health*  
5 2020;17(12):4253.  
6  
7  
8 45. Chenot JF. Undergraduate medical education in Germany. *Ger Med Sci* 2009;7:Doc02.  
9  
10 46. Dale R, Budimir S, Probst T, Stippl P, Pieh C. Mental Health during the COVID-19 Lockdown over the  
11 Christmas Period in Austria and the Effects of Sociodemographic and Lifestyle Factors. *Int J Environ Res*  
12 *Public Health* 2021;18(7).  
13  
14 47. Dyrbye LN, Thomas MR, Shanafelt TD. Systematic review of depression, anxiety, and other indicators  
15 of psychological distress among U.S. and Canadian medical students. *Acad Med* 2006;81(4):354-73.  
16  
17 48. Qiu J, Shen B, Zhao M, Wang Z, Xie B, Xu Y. A nationwide survey of psychological distress among  
18 Chinese people in the COVID-19 epidemic: implications and policy recommendations. *General*  
19 *psychiatry* 2020;33(2):e100213.  
20  
21 49. Park CL, Russell BS, Fendrich M, Finkelstein-Fox L, Hutchison M, Becker J. Americans' COVID-19 Stress,  
22 Coping, and Adherence to CDC Guidelines. *Journal of general internal medicine* 2020;35(8):2296-303.;  
23  
24 50. Liu N, Zhang F, Wei C, Jia Y, Shang Z, Sun L, et al. Prevalence and predictors of PTSS during COVID-19  
25 outbreak in China hardest-hit areas: Gender differences matter. *Psychiatry Res* 2020;287:112921.  
26  
27 51. Pieh C, Budimir S, Probst T. The effect of age, gender, income, work, and physical activity on mental  
28 health during coronavirus disease (COVID-19) lockdown in Austria (vol 136, 110186, 2020). *J*  
29 *Psychosom Res* 2020;139.  
30  
31 52. Brooks SK, Webster RK, Smith LE et al. The psychological impact of quarantine and how to reduce it:  
32 rapid review of the evidence. *Lancet* 2020;395(10227):912-20.  
33  
34 53. Gabriel R, Röhrs HP. Social Media: Springer Gabler; 2017.  
35  
36 54. Huang Y, Zhao N. Generalized anxiety disorder, depressive symptoms and sleep quality during COVID-  
37 19 outbreak in China: a web-based cross-sectional survey. *Psychiatry Res* 2020;288:112954.  
38  
39 55. Salkind NJ. (2010). Encyclopedia of research design: Thousand Oaks, CA: SAGE Publications; 2010.  
40  
41 56. Cao W, Fang Z, Hou G, Han M, Xu X, Dong J, Zheng J. The psychological impact of the COVID-19 epidemic  
42 on college students in China. *Psychiatry Res.* 2020;287:112934.  
43  
44 57. Zhang Y, Zhang H, Ma X, Di Q. Mental Health Problems during the COVID-19 Pandemics and the  
45 Mitigation Effects of Exercise: A Longitudinal Study of College Students in China. *Int. J. Environ. Res.*  
46 *Public Health* 2020; 17(10):3722.  
47  
48 58. Grubic N, Badovinac S, Johri AM. Student mental health in the midst of the COVID-19 pandemic: A call  
49 for further research and immediate solutions. *Int J Soc Psychiatry* 2020;66(5):517-518.  
50  
51  
52  
53  
54  
55  
56  
57  
58  
59  
60

- 1  
2  
3 59. Grubic N, Jain S, Mihajlovic V, Thornton JS, Johri AM. Competing against COVID-19: have we forgotten  
4 about student-athletes' mental health? *Br J Sports Med* 2021;55(17):950-951.  
5  
6  
7 60. Wasson LT, Cusmano A, Meli L, Louh I, Falzon L, Hampsey M, Young G, Shaffer J, Davidson KW.  
8 Association Between Learning Environment Interventions and Medical Student Well-being: A  
9 Systematic Review. *JAMA*. 2016 Dec 6;316(21):2237-2252.  
10  
11  
12  
13 61. Rastegar Kazerooni A, Amini M, Tabari P, Moosavi M. Peer mentoring for medical students during the  
14 COVID-19 pandemic via a social media platform. *Med Educ* 2020;54(8):762-763.  
15  
16  
17  
18  
19  
20  
21  
22  
23  
24  
25  
26  
27  
28  
29  
30  
31  
32  
33  
34  
35  
36  
37  
38  
39  
40  
41  
42  
43  
44  
45  
46  
47  
48  
49  
50  
51  
52  
53  
54  
55  
56  
57  
58  
59  
60

For peer review only

# Reporting checklist for cross sectional study.

Based on the STROBE cross sectional guidelines.

## Instructions to authors

Complete this checklist by entering the page numbers from your manuscript where readers will find each of the items listed below.

Your article may not currently address all the items on the checklist. Please modify your text to include the missing information. If you are certain that an item does not apply, please write "n/a" and provide a short explanation.

Upload your completed checklist as an extra file when you submit to a journal.

In your methods section, say that you used the STROBE cross sectional reporting guidelines, and cite them as:

von Elm E, Altman DG, Egger M, Pocock SJ, Gotsche PC, Vandenbroucke JP. The Strengthening the Reporting of Observational Studies in Epidemiology (STROBE) Statement: guidelines for reporting observational studies.

|                           |                                                                                                        | Page   |
|---------------------------|--------------------------------------------------------------------------------------------------------|--------|
|                           | Reporting Item                                                                                         | Number |
| <b>Title and abstract</b> |                                                                                                        |        |
| Title                     | <a href="#">#1a</a> Indicate the study's design with a commonly used term in the title or the abstract | 1      |

|    |                      |                     |                                                                 |   |
|----|----------------------|---------------------|-----------------------------------------------------------------|---|
| 1  | Abstract             | <a href="#">#1b</a> | Provide in the abstract an informative and balanced summary     | 2 |
| 2  |                      |                     |                                                                 |   |
| 3  |                      |                     |                                                                 |   |
| 4  |                      |                     | of what was done and what was found                             |   |
| 5  |                      |                     |                                                                 |   |
| 6  | <b>Introduction</b>  |                     |                                                                 |   |
| 7  |                      |                     |                                                                 |   |
| 8  |                      |                     |                                                                 |   |
| 9  |                      |                     |                                                                 |   |
| 10 | Background /         | <a href="#">#2</a>  | Explain the scientific background and rationale for the         | 3 |
| 11 | rationale            |                     | investigation being reported                                    |   |
| 12 |                      |                     |                                                                 |   |
| 13 |                      |                     |                                                                 |   |
| 14 |                      |                     |                                                                 |   |
| 15 | Objectives           | <a href="#">#3</a>  | State specific objectives, including any prespecified           | 4 |
| 16 |                      |                     | hypotheses                                                      |   |
| 17 |                      |                     |                                                                 |   |
| 18 |                      |                     |                                                                 |   |
| 19 |                      |                     |                                                                 |   |
| 20 | <b>Methods</b>       |                     |                                                                 |   |
| 21 |                      |                     |                                                                 |   |
| 22 |                      |                     |                                                                 |   |
| 23 | Study design         | <a href="#">#4</a>  | Present key elements of study design early in the paper         | 4 |
| 24 |                      |                     |                                                                 |   |
| 25 |                      |                     |                                                                 |   |
| 26 | Setting              | <a href="#">#5</a>  | Describe the setting, locations, and relevant dates, including  | 4 |
| 27 |                      |                     | periods of recruitment, exposure, follow-up, and data           |   |
| 28 |                      |                     | collection                                                      |   |
| 29 |                      |                     |                                                                 |   |
| 30 |                      |                     |                                                                 |   |
| 31 | Eligibility criteria | <a href="#">#6a</a> | Give the eligibility criteria, and the sources and methods of   | 4 |
| 32 |                      |                     | selection of participants.                                      |   |
| 33 |                      |                     |                                                                 |   |
| 34 |                      |                     |                                                                 |   |
| 35 |                      |                     |                                                                 |   |
| 36 |                      |                     |                                                                 |   |
| 37 |                      |                     |                                                                 |   |
| 38 |                      |                     |                                                                 |   |
| 39 |                      |                     |                                                                 |   |
| 40 |                      | <a href="#">#7</a>  | Clearly define all outcomes, exposures, predictors, potential   | 5 |
| 41 |                      |                     | confounders, and effect modifiers. Give diagnostic criteria, if |   |
| 42 |                      |                     | applicable                                                      |   |
| 43 |                      |                     |                                                                 |   |
| 44 |                      |                     |                                                                 |   |
| 45 |                      |                     |                                                                 |   |
| 46 |                      |                     |                                                                 |   |
| 47 | Data sources /       | <a href="#">#8</a>  | For each variable of interest give sources of data and details  | 5 |
| 48 | measurement          |                     | of methods of assessment (measurement). Describe                |   |
| 49 |                      |                     | comparability of assessment methods if there is more than       |   |
| 50 |                      |                     | one group. Give information separately for for exposed and      |   |
| 51 |                      |                     | unexposed groups if applicable.                                 |   |
| 52 |                      |                     |                                                                 |   |
| 53 |                      |                     |                                                                 |   |
| 54 |                      |                     |                                                                 |   |
| 55 |                      |                     |                                                                 |   |
| 56 |                      |                     |                                                                 |   |
| 57 |                      |                     |                                                                 |   |
| 58 |                      |                     |                                                                 |   |
| 59 |                      |                     |                                                                 |   |
| 60 |                      |                     |                                                                 |   |



|    |                |                      |                                                               |     |
|----|----------------|----------------------|---------------------------------------------------------------|-----|
| 1  | Bias           | <a href="#">#9</a>   | Describe any efforts to address potential sources of bias     | 7   |
| 2  |                |                      |                                                               |     |
| 3  |                |                      |                                                               |     |
| 4  | Study size     | <a href="#">#10</a>  | Explain how the study size was arrived at                     | 4   |
| 5  |                |                      |                                                               |     |
| 6  |                |                      |                                                               |     |
| 7  | Quantitative   | <a href="#">#11</a>  | Explain how quantitative variables were handled in the        | 6   |
| 8  | variables      |                      | analyses. If applicable, describe which groupings were        |     |
| 9  |                |                      | chosen, and why                                               |     |
| 10 |                |                      |                                                               |     |
| 11 |                |                      |                                                               |     |
| 12 |                |                      |                                                               |     |
| 13 |                |                      |                                                               |     |
| 14 |                |                      |                                                               |     |
| 15 | Statistical    | <a href="#">#12a</a> | Describe all statistical methods, including those used to     | 6   |
| 16 | methods        |                      | control for confounding                                       |     |
| 17 |                |                      |                                                               |     |
| 18 |                |                      |                                                               |     |
| 19 |                |                      |                                                               |     |
| 20 | Statistical    | <a href="#">#12b</a> | Describe any methods used to examine subgroups and            | 6   |
| 21 | methods        |                      | interactions                                                  |     |
| 22 |                |                      |                                                               |     |
| 23 |                |                      |                                                               |     |
| 24 |                |                      |                                                               |     |
| 25 |                |                      |                                                               |     |
| 26 | Statistical    | <a href="#">#12c</a> | Explain how missing data were addressed                       | 4   |
| 27 | methods        |                      |                                                               |     |
| 28 |                |                      |                                                               |     |
| 29 |                |                      |                                                               |     |
| 30 |                |                      |                                                               |     |
| 31 | Statistical    | <a href="#">#12d</a> | If applicable, describe analytical methods taking account of  | n/a |
| 32 | methods        |                      | sampling strategy                                             |     |
| 33 |                |                      |                                                               |     |
| 34 |                |                      |                                                               |     |
| 35 |                |                      |                                                               |     |
| 36 | Statistical    | <a href="#">#12e</a> | Describe any sensitivity analyses                             | n/a |
| 37 | methods        |                      |                                                               |     |
| 38 |                |                      |                                                               |     |
| 39 |                |                      |                                                               |     |
| 40 |                |                      |                                                               |     |
| 41 |                |                      |                                                               |     |
| 42 | <b>Results</b> |                      |                                                               |     |
| 43 |                |                      |                                                               |     |
| 44 |                |                      |                                                               |     |
| 45 | Participants   | <a href="#">#13a</a> | Report numbers of individuals at each stage of study—eg       | 7   |
| 46 |                |                      | numbers potentially eligible, examined for eligibility,       |     |
| 47 |                |                      | confirmed eligible, included in the study, completing follow- |     |
| 48 |                |                      | up, and analysed. Give information separately for for         |     |
| 49 |                |                      | exposed and unexposed groups if applicable.                   |     |
| 50 |                |                      |                                                               |     |
| 51 |                |                      |                                                               |     |
| 52 |                |                      |                                                               |     |
| 53 |                |                      |                                                               |     |
| 54 |                |                      |                                                               |     |
| 55 |                |                      |                                                               |     |
| 56 |                |                      |                                                               |     |
| 57 | Participants   | <a href="#">#13b</a> | Give reasons for non-participation at each stage              | n/a |
| 58 |                |                      |                                                               |     |
| 59 |                |                      |                                                               |     |
| 60 |                |                      |                                                               |     |

|    |                   |                      |                                                                   |       |
|----|-------------------|----------------------|-------------------------------------------------------------------|-------|
| 1  | Participants      | <a href="#">#13c</a> | Consider use of a flow diagram                                    | n/a   |
| 2  |                   |                      |                                                                   |       |
| 3  |                   |                      |                                                                   |       |
| 4  | Descriptive data  | <a href="#">#14a</a> | Give characteristics of study participants (eg demographic,       | 7-8   |
| 5  |                   |                      | clinical, social) and information on exposures and potential      |       |
| 6  |                   |                      | confounders. Give information separately for exposed and          |       |
| 7  |                   |                      | unexposed groups if applicable.                                   |       |
| 8  |                   |                      |                                                                   |       |
| 9  |                   |                      |                                                                   |       |
| 10 |                   |                      |                                                                   |       |
| 11 |                   |                      |                                                                   |       |
| 12 |                   |                      |                                                                   |       |
| 13 |                   |                      |                                                                   |       |
| 14 | Descriptive data  | <a href="#">#14b</a> | Indicate number of participants with missing data for each        | 9; 11 |
| 15 |                   |                      | variable of interest                                              |       |
| 16 |                   |                      |                                                                   |       |
| 17 |                   |                      |                                                                   |       |
| 18 |                   |                      |                                                                   |       |
| 19 | Outcome data      | <a href="#">#15</a>  | Report numbers of outcome events or summary measures.             | n/a   |
| 20 |                   |                      | Give information separately for exposed and unexposed             |       |
| 21 |                   |                      | groups if applicable.                                             |       |
| 22 |                   |                      |                                                                   |       |
| 23 |                   |                      |                                                                   |       |
| 24 |                   |                      |                                                                   |       |
| 25 |                   |                      |                                                                   |       |
| 26 |                   |                      |                                                                   |       |
| 27 | Main results      | <a href="#">#16a</a> | Give unadjusted estimates and, if applicable, confounder-         | n/a   |
| 28 |                   |                      | adjusted estimates and their precision (eg, 95% confidence        |       |
| 29 |                   |                      | interval). Make clear which confounders were adjusted for         |       |
| 30 |                   |                      | and why they were included                                        |       |
| 31 |                   |                      |                                                                   |       |
| 32 |                   |                      |                                                                   |       |
| 33 |                   |                      |                                                                   |       |
| 34 |                   |                      |                                                                   |       |
| 35 |                   |                      |                                                                   |       |
| 36 |                   |                      |                                                                   |       |
| 37 | Main results      | <a href="#">#16b</a> | Report category boundaries when continuous variables were         | 9     |
| 38 |                   |                      | categorized                                                       |       |
| 39 |                   |                      |                                                                   |       |
| 40 |                   |                      |                                                                   |       |
| 41 |                   |                      |                                                                   |       |
| 42 | Main results      | <a href="#">#16c</a> | If relevant, consider translating estimates of relative risk into | n/a   |
| 43 |                   |                      | absolute risk for a meaningful time period                        |       |
| 44 |                   |                      |                                                                   |       |
| 45 |                   |                      |                                                                   |       |
| 46 |                   |                      |                                                                   |       |
| 47 |                   |                      |                                                                   |       |
| 48 | Other analyses    | <a href="#">#17</a>  | Report other analyses done—e.g., analyses of subgroups            | n/a   |
| 49 |                   |                      | and interactions, and sensitivity analyses                        |       |
| 50 |                   |                      |                                                                   |       |
| 51 |                   |                      |                                                                   |       |
| 52 |                   |                      |                                                                   |       |
| 53 | <b>Discussion</b> |                      |                                                                   |       |
| 54 |                   |                      |                                                                   |       |
| 55 |                   |                      |                                                                   |       |
| 56 | Key results       | <a href="#">#18</a>  | Summarise key results with reference to study objectives          | 17    |
| 57 |                   |                      |                                                                   |       |
| 58 |                   |                      |                                                                   |       |
| 59 |                   |                      |                                                                   |       |
| 60 |                   |                      |                                                                   |       |

|    |                          |                     |                                                                |    |
|----|--------------------------|---------------------|----------------------------------------------------------------|----|
| 1  | Limitations              | <a href="#">#19</a> | Discuss limitations of the study, taking into account sources  | 18 |
| 2  |                          |                     | of potential bias or imprecision. Discuss both direction and   |    |
| 3  |                          |                     | magnitude of any potential bias.                               |    |
| 4  |                          |                     |                                                                |    |
| 5  |                          |                     |                                                                |    |
| 6  |                          |                     |                                                                |    |
| 7  |                          |                     |                                                                |    |
| 8  |                          |                     |                                                                |    |
| 9  | Interpretation           | <a href="#">#20</a> | Give a cautious overall interpretation considering objectives, | 18 |
| 10 |                          |                     | limitations, multiplicity of analyses, results from similar    |    |
| 11 |                          |                     | studies, and other relevant evidence.                          |    |
| 12 |                          |                     |                                                                |    |
| 13 |                          |                     |                                                                |    |
| 14 |                          |                     |                                                                |    |
| 15 |                          |                     |                                                                |    |
| 16 | Generalisability         | <a href="#">#21</a> | Discuss the generalisability (external validity) of the study  | 18 |
| 17 |                          |                     | results.                                                       |    |
| 18 |                          |                     |                                                                |    |
| 19 |                          |                     |                                                                |    |
| 20 |                          |                     |                                                                |    |
| 21 |                          |                     |                                                                |    |
| 22 | <b>Other Information</b> |                     |                                                                |    |
| 23 |                          |                     |                                                                |    |
| 24 |                          |                     |                                                                |    |
| 25 | Funding                  | <a href="#">#22</a> | Give the source of funding and the role of the funders for the | 18 |
| 26 |                          |                     | present study and, if applicable, for the original study on    |    |
| 27 |                          |                     | which the present article is based                             |    |
| 28 |                          |                     |                                                                |    |
| 29 |                          |                     |                                                                |    |
| 30 |                          |                     |                                                                |    |
| 31 |                          |                     |                                                                |    |
| 32 |                          |                     |                                                                |    |

33 None The STROBE checklist is distributed under the terms of the Creative Commons Attribution  
34 License CC-BY. This checklist can be completed online using <https://www.goodreports.org/>, a tool  
35 made by the [EQUATOR Network](#) in collaboration with [Penelope.ai](#)  
36  
37  
38  
39  
40  
41  
42  
43  
44  
45  
46  
47  
48  
49  
50  
51  
52  
53  
54  
55  
56  
57  
58  
59  
60

# BMJ Open

## Mental burden and perception of the study situation among undergraduate students during the COVID-19 pandemic: a cross-sectional study and comparison of dental and medical students

|                                 |                                                                                                                                                                                                                                                                                                                                                                                                                                                                      |
|---------------------------------|----------------------------------------------------------------------------------------------------------------------------------------------------------------------------------------------------------------------------------------------------------------------------------------------------------------------------------------------------------------------------------------------------------------------------------------------------------------------|
| Journal:                        | <i>BMJ Open</i>                                                                                                                                                                                                                                                                                                                                                                                                                                                      |
| Manuscript ID                   | bmjopen-2021-054728.R2                                                                                                                                                                                                                                                                                                                                                                                                                                               |
| Article Type:                   | Original research                                                                                                                                                                                                                                                                                                                                                                                                                                                    |
| Date Submitted by the Author:   | 09-Nov-2021                                                                                                                                                                                                                                                                                                                                                                                                                                                          |
| Complete List of Authors:       | Guse, Jennifer; University Medical Center Hamburg-Eppendorf, Department of Medical Psychology<br>Weegen, Annabel ; University Medical Center Hamburg-Eppendorf, Department of Medical Psychology<br>Heinen, Ines; University Medical Center Hamburg-Eppendorf, Department of Medical Psychology<br>Bergelt, Corinna; University Medical Center Hamburg-Eppendorf, Department of Medical Psychology; University Medicine Greifswald, Department of Medical Psychology |
| <b>Primary Subject Heading</b>: | Medical education and training                                                                                                                                                                                                                                                                                                                                                                                                                                       |
| Secondary Subject Heading:      | Mental health, Qualitative research                                                                                                                                                                                                                                                                                                                                                                                                                                  |
| Keywords:                       | MEDICAL EDUCATION & TRAINING, COVID-19, MENTAL HEALTH, QUALITATIVE RESEARCH                                                                                                                                                                                                                                                                                                                                                                                          |
|                                 |                                                                                                                                                                                                                                                                                                                                                                                                                                                                      |

SCHOLARONE™  
Manuscripts



I, the Submitting Author has the right to grant and does grant on behalf of all authors of the Work (as defined in the below author licence), an exclusive licence and/or a non-exclusive licence for contributions from authors who are: i) UK Crown employees; ii) where BMJ has agreed a CC-BY licence shall apply, and/or iii) in accordance with the terms applicable for US Federal Government officers or employees acting as part of their official duties; on a worldwide, perpetual, irrevocable, royalty-free basis to BMJ Publishing Group Ltd ("BMJ") its licensees and where the relevant Journal is co-owned by BMJ to the co-owners of the Journal, to publish the Work in this journal and any other BMJ products and to exploit all rights, as set out in our [licence](#).

The Submitting Author accepts and understands that any supply made under these terms is made by BMJ to the Submitting Author unless you are acting as an employee on behalf of your employer or a postgraduate student of an affiliated institution which is paying any applicable article publishing charge ("APC") for Open Access articles. Where the Submitting Author wishes to make the Work available on an Open Access basis (and intends to pay the relevant APC), the terms of reuse of such Open Access shall be governed by a Creative Commons licence – details of these licences and which [Creative Commons](#) licence will apply to this Work are set out in our licence referred to above.

Other than as permitted in any relevant BMJ Author's Self Archiving Policies, I confirm this Work has not been accepted for publication elsewhere, is not being considered for publication elsewhere and does not duplicate material already published. I confirm all authors consent to publication of this Work and authorise the granting of this licence.

1  
2  
3 **Mental burden and perception of the study situation among undergraduate students during**  
4 **the COVID-19 pandemic: a cross-sectional study and comparison of dental and medical**  
5 **students**  
6  
7  
8  
9  
10

11 Jennifer Guse<sup>1</sup> (<https://orcid.org/0000-0001-5020-929X>), research assistant, Department of Medical  
12 Psychology, University Medical Center Hamburg-Eppendorf, Hamburg, Germany  
13

14  
15 Annabel Susan Weegen<sup>1</sup> (<https://orcid.org/0000-0001-5462-1775>), dental student, Department of  
16 Medical Psychology, University Medical Center Hamburg-Eppendorf, Hamburg, Germany  
17

18  
19 Ines Heinen (<https://orcid.org/0000-0001-7361-4554>), research assistant, Department of Medical  
20 Psychology, University Medical Center Hamburg-Eppendorf, Hamburg, Germany  
21

22  
23 Corinna Bergelt (<https://orcid.org/0000-0003-1413-1872>), associate professor, Department of  
24 Medical Psychology, University Medical Center Hamburg-Eppendorf, Hamburg, Germany, and  
25 Department of Medical Psychology, University Medicine Greifswald, Germany  
26  
27  
28

29  
30  
31 <sup>1</sup>Equal contributors  
32

33  
34  
35 Keywords: Dental students, medical students, COVID-19 pandemic, mental health, undergraduate  
36 medical education  
37  
38

39  
40  
41  
42  
43 Corresponding author:

44  
45 Dr. Jennifer Guse

46  
47 University Medical Center Hamburg-Eppendorf

48  
49 Center for Psychosocial Medicine

50  
51 Department of Medical Psychology

52  
53 Martinistraße 52, W26

54  
55 20246 Hamburg

56  
57 E-mail: [j.guse@uke.de](mailto:j.guse@uke.de)  
58

59  
60 Word count: 3.681

## ABSTRACT

**Objectives:** To investigate levels of distress, depression, anxiety, stress and perception of their current study situation during the COVID-19 pandemic among undergraduate dental and medical students.

**Design:** Observational, cross-sectional study including two consecutive surveys (May and July 2020).

**Setting:** A large medical school in Germany.

**Participants:** All first year dental and medical students were invited. 132 participating first year students (44 dental, 88 medical) from the first survey and 150 students (50 dental, 100 medical) from the second were included in our analyses.

**Primary and secondary outcome measures:** Mental burden (Distress Thermometer, Patient Health Questionnaire PHQ-4, Perceived Stress Scale, PSS-4) and self-reported changes in mental health and perception of study situation during the COVID-19 pandemic (self-developed items) were compared. Open-ended questions were analyzed by conventional content analyses.

**Results:** A considerable proportion of students (t1: May 2020: 84.1%; t2: July 2020: 77.3%) reported distress levels above cutoff. In July 2020, dental students reported significantly higher distress scores than medical students (dental:  $M=7.0$ ,  $SD=2.3$ ; medical:  $M=5.7$ ;  $SD=2.1$ ;  $p<.001$ ). More dental than medical students reported mild, moderate and severe levels of anxiety and depression symptoms. The majority stated that their mental health and study motivation had not changed during the pandemic. Logistic regression showed that being a dental student was significantly associated with a higher likelihood for serious worries regarding the study situation during COVID-19 at t1 (OR: 4.0; CI (95%): 1.1 – 14.2). At t2 higher distress was significantly associated with a higher likelihood for experiencing serious worries (OR: 1.8; CI (95%): 1.3 – 2.5). Regarding current concerns related to the pandemic, students most frequently reported difficulties with self-regulated learning (15.2%), study-related worries and uncertainty (14.4%), missing feedback of students and lecturers (11.4%) and lack of practical training (9.8%).

**Conclusion:** The results suggest that high mental burden and the lack of practical training among medical and dental students is an increasing problem, with a possibly even higher urgency in dental students. Tailored psychological and educational support offers during and after the COVID-19 pandemic might help them as they progress through (medical and) dental school.

### Strengths and limitations of this study

- This study offers in-depth exploration of students' mental health and perception of their study situation during the COVID-19 pandemic by combining quantitative data and qualitative data

- This study included well-established and valid instruments (quantitative data) and applied conventional content analyses with inductive categorization (qualitative data).
- Response rates of this study were high (65.3% - 87.2%).
- It is a single-institution study and the cross-sectional design does not allow causal statements about longitudinal developments.

## INTRODUCTION

The corona virus disease (COVID-19) pandemic and its consequences have an impact on the private, professional and social life of all people[1]. It has brought widespread disruption to undergraduate medical education[2, 3]. Thus medical students worldwide face major changes regarding their medical training and study motivation decreased[4]. Many medical schools have made changes to their curricula and campus life to protect patients and students by social distancing. Roles of medical students' during the COVID-19 pandemic are discussed controversial[5]. Even in the absence of the COVID-19 pandemic, mental burden is common among medical students[6, 7, 8] and several studies report lower mental health outcomes for medical students in the course of their medical studies compared to population reference samples[9]. In particular, depression and anxiety symptoms are reported among medical[7, 10] and dental students[11-13]. Often students feel that they do not have adequate coping strategies to deal with study-related workload and stress[14]. Dental students are highly stressed and perform at a comparable or higher stress level than medical students[15]. Studies have shown that the stress level increases with each semester, especially due to the high proportion of practical training in dental studies[13, 16].

In light of novel circumstances during the COVID-19 pandemic, uncertainty relating to personal and professional future and rapid changes medical students may be even more at risk of experiencing severe mental burden during the pandemic than before. Increased incidence rates of stress and mental burden are an expected response under the current conditions[17].

Studies have shown the negative impact of past pandemics[18] and the COVID-19 pandemic[19] on the general population, as well as on specific groups[20]. Health professionals may be particularly affected[21], as pandemic-specific stressors are added to the general ones[22]. High prevalence for mental health symptoms among health care workers exposed to COVID-19 was found[20]. Students are also highly burdened while facing new challenges raised by the pandemic's consequences[23, 24]. COVID-19 related mental stress, higher rates of depression and a high symptom burden from the acute stress response according to the COVID-19 pandemic are common especially among health care students[25], as they have to cope with mental and emotional issues, including stress and anxiety.



1  
2  
3 In contrast to the exposure of students in general during the COVID-19 pandemic, the mental burden  
4 of medical and dental students in particular is still poorly addressed in the international literature even  
5 though they are facing special challenges in health care[26].  
6  
7

8 Therefore, the aim of this study was to assess the magnitude of distress, depression and anxiety and  
9 stress among undergraduate dental and medical students in the course of the COVID-19 pandemic.  
10 Secondly, we aimed to explore students' perception of the study situation during the pandemic and  
11 compare dental and medical students' perception during the first lockdown period and thereafter.  
12  
13  
14  
15  
16  
17

## 18 **METHODS**

### 19 **Design and setting**

20 This observational study consists of two cross-sectional surveys conducted at the University Medical  
21 Center Hamburg-Eppendorf, Germany, from May 28, 2020 to June 7 (t1), 2020 and from July 16, 2020  
22 to July 31, 2020 (t2). During this period and before (since mid-March 2020) the German government  
23 announced several public health measures to suppress the spread of COVID-19 by increasing social  
24 distancing, i.e. the closure of schools, daycare, playgrounds and non-essential shops, the prohibition  
25 to meet more than one person from another household and depending on regional regulations the  
26 prohibition to leave the apartment without reason[27]. Concurrently lectures and seminars at the  
27 universities were predominantly held in a digital format to reduce interpersonal contact and to protect  
28 patients, students and faculty[28]. Thus, the learning environment and examination conditions for  
29 students have changed significantly. Many medical schools have discontinued their undergraduate  
30 medical training and transitioned most of their teaching to digital formats[29]. This included but was  
31 not limited to the transformation of Objective Structured Clinical Examinations (OSCE[30]) into  
32 Multiple Choice tests.  
33  
34  
35  
36  
37  
38  
39  
40  
41  
42  
43  
44  
45  
46

### 47 **Participants**

48 All first year dental students (n=68) enrolled in the integrated dental degree program iMED DENT  
49 launched in 2019 and medical students (n=352) enrolled in the integrated medical degree program  
50 iMED established in 2012 at the Medical School of the University of Hamburg, Germany[31] were  
51 invited to participate in the online surveys. Students were asked to complete an anonymous  
52 questionnaire linked to the voluntary curriculum evaluation conducted by the dean's office in regular  
53 intervals during the course of the year. A few days in advance the students were informed via e-mail  
54 of the study aims, voluntary participation and data protection regulations. Participants did not receive  
55 any incentives for answering the questionnaire.  
56  
57  
58  
59  
60

## Measures

We developed an online questionnaire and focused on symptoms of distress, depression and anxiety and stress by using established self-reporting questionnaires. Furthermore, we assessed the perception of the study situation during the pandemic and study motivation with self-developed items. Demographic characteristics (age in categories, gender) were also self-reported.

### Distress

We assessed students' distress at t1 (May 2020) and t2 (July 2020) using the German version of the Distress-Thermometer (DT), a brief screening instrument developed by the National Comprehensive Cancer Network (NCCN)[32]. The DT is a single-item instrument with a scale from 0-10. Higher scores indicate higher distress. Internationally a cutoff score of 4 is established as a signal that a person is distressed and needs support. The DT is a reliable and efficient screening instrument[32].

### Depression and anxiety

We measured depression and anxiety using the German version of the four-item Patient Health Questionnaire (PHQ-4), an ultra-brief screening instrument that consists of a two-item depression scale (PHQ-2) and a two-item anxiety scale (GAD-2)[33]. It assesses the amount of depression and anxiety symptoms the individual has felt during the past two weeks. A score of 3 or higher on the PHQ-2 and GAD-2 is established as a reasonable cut-off score clinically relevant levels of depressive and anxiety symptoms. The total PHQ-4 score is considered as an overall measure of symptom burden with the following categories: 0-2 normal, 3-5 mild, 6-8 moderate, 9-12 severe. It is an efficient screening instrument with good internal consistency and construct validity and areas under the curve between 0.84 (anxiety) and 0.79 (depression) among students[34].

### Changes in mental health and perception of study situation during the COVID-19 pandemic

Furthermore we administered five self-developed items to assess changes in students' mental health and perception of the study situation: Students were asked whether their mental health has changed since the beginning of the pandemic with five answer options (clearly improved; rather improved; unchanged; rather worsened; clearly worsened). They were asked if the assessment of their study situation has changed in the context of the pandemic with three answer options (No, I am as worried or unworried as before; Yes, I am somewhat worried; Yes, I am seriously worried). Furthermore

1  
2  
3 students were asked if the pandemic affected their possibility to participate in exams with five options  
4 to answer (No exams took place since the beginning of the pandemic; Exams took place without  
5 changes; Exams did not take place, but a new date is scheduled; Exams did not take place and no new  
6 date is scheduled yet; I was not able to attend exams due to quarantine or illness). Students were  
7 asked if their study motivation had changed since the beginning of the pandemic. Answers were rated  
8 on a 5-point Likert-type scale (clearly increased; rather increased; unchanged; rather decreased; clearly  
9 decreased). Finally, students were asked for free text responses regarding the question what currently  
10 is occupying them most in their current study situation and what they experience as particularly  
11 helpful.  
12  
13  
14  
15  
16  
17  
18  
19  
20

## 21 Stress

22  
23 In the second survey students' perception of stress was quantified with the Perceived Stress Scale (PSS-  
24 4). The 4-item self-report instrument with reverse coding for two items assesses on a five-point Likert  
25 scale the degree to which situations in one's life were perceived as stressful in the past month[35].  
26 Higher scores on the PSS-4 indicate higher stress levels.  
27  
28  
29  
30  
31  
32

## 33 Burdening aspects

34  
35 For the second data collection in July 2020, we developed six items based on the qualitative results  
36 from the first survey to assess burdening aspects experienced by the students' quantitatively. The  
37 respondents had the possibility to answer in four levels (1 = "not at all burdensome" to 4 = "very  
38 burdensome").  
39  
40  
41  
42  
43  
44

## 45 Data analysis

46  
47 We matched dental students to medical students according to age and gender in the ratio of 1:2 in  
48 order to harmonize the initially inhomogeneous sample sizes and enhance comparability of the  
49 samples. In May 2020, the final sample consisted of n=132 students (44 dental and 88 medical  
50 students). In July 2020, the sample comprised 150 students (50 dental and 100 medical students). With  
51 74% (t1) and 69% (t2) female students the gender ratio of the sample is comparable to the ratio of first  
52 year students at German medical schools[36]. We used descriptive statistics to characterize the  
53 sample. Group comparisons were carried out using chi<sup>2</sup>-tests for categorical variables and t-tests for  
54 differences of means.  
55  
56  
57  
58  
59  
60

1  
2  
3 We conducted descriptive analyses to examine the magnitude of distress (DT), depression and anxiety  
4 (PHQ-4), and stress (PSS-4). The results of the entire sample as well as of the subgroups (dental and  
5 medical students) were compared with PHQ-4 data of a German medical student sample (n=321, mean  
6 age=21.8 years, 60.7% women) from a previous study at the same faculty[8] with one-sample t-tests.  
7  
8 To examine the likelihood for serious worries (dichotomous) regarding the study situation during the  
9 COVID-19 pandemic at t1 we conducted a binary logistic regression model with sex, subject of study,  
10 the magnitude of distress, depression and anxiety as potential predictors. Non-significant variables  
11 were excluded via backward elimination and dropped at the level of  $p < 0.05$ . We applied likelihood  
12 ratio method, which is recommended for stepwise methods[37]. To avoid multicollinearity, we  
13 analyzed Variable Inflation Factors (VIF) scores. We conducted effect size calculations and considered  
14 according to Cohen's  $f^2 = .02$  to be a small effect,  $f^2 = .15$  as a medium effect, and  $f^2 = .35$  as a large  
15 effect[38]. All quantitative analyses were carried out using IBM SPSS version 27.

16  
17 We used conventional content analyses with inductive categorization to analyze the free text  
18 responses[39]. Two researchers familiarized themselves with the qualitative data (IH, JG). They  
19 identified key concepts and generated labels of codes for recurring themes independently. Next, both  
20 sorted codes into categories independently, which were reviewed by all authors. We developed final  
21 definitions for categories and codes with iterative consultations and discussions until consensus was  
22 achieved. We chose excerpts to exemplify each category and translated them into English. For the  
23 qualitative data analysis, we used MAXQDA 2020 (VERBI Software, 2019).

24  
25 Following the inductive categorization we recoded answers for each category into dichotomous  
26 variables (mentioned vs. not mentioned) to enhance data transparency and to provide evidence for  
27 our interpretation[40]. When students provided more than one category per response, all responses  
28 respectively categories were categorized. The qualitative results of the first survey served as the basis  
29 for developing six quantitative items for the second survey.

30  
31 The local ethics board of the Center for Psychosocial Medicine at the University Medical Center  
32 Hamburg-Eppendorf approved the study (LPEK-0161).

### 33 34 35 36 37 38 39 40 41 42 43 44 45 46 47 48 49 50 51 Patient and Public Involvement

52  
53 We did not involve patients in our study. Research questions were developed by the principle  
54 investigators (CB, JG) and discussed with the Curriculumkomitee iMED, Hamburg (CK iMED) in April  
55 2020. CK iMED is a committee consisting of students, teachers and a member of the dean's office,  
56 which has the task of further developing and optimizing the structure and content of the reformed  
57 medical degree program iMED. Subsequently all enrolled students were informed by e-mail about the  
58 design, conduct, the outcome measures and the recruitment and encouraged to give feedback. After  
59  
60

publication a summary of the results will be presented in plain language on the website of the University Medical Center Hamburg-Eppendorf.

## RESULTS

Of 68 first year dental students enrolled in the dental education program at the UKE in May 2020, 44 (65.3%) completed the first survey (t1) in May 2020 and were matched to 88 medical first year students who completed the t1 survey as described above (overall response rate of the medical students was 87.2%). The response rate of the second survey (t2) was 81% among first year dental students and 82% among first year medical students. With 75.0% (t1) and 70.0% (t2) female dental students and 39.7% (t1) and 40.0% (t2) aged 20 years and younger, both samples are similar to the population of first year dental students at the faculty. The demographic characteristics of the final samples are shown in Table1.

**Table 1:** Sample characteristics among dental and medical students participating in the first ( $n^1=132$ ) and second survey ( $n^2=150$ )

|                     | First Survey (May 2020) |                                         |                                          | Second Survey (July 2020) |                                         |                                           |
|---------------------|-------------------------|-----------------------------------------|------------------------------------------|---------------------------|-----------------------------------------|-------------------------------------------|
|                     | Whole sample<br>(n=132) | Dental students<br>(n <sub>1</sub> =44) | Medical students<br>(n <sub>1</sub> =88) | Whole sample<br>(n=150)   | Dental students<br>(n <sub>2</sub> =50) | Medical students<br>(n <sub>2</sub> =100) |
|                     | %                       | %                                       | %                                        | %                         | %                                       | %                                         |
| <b>sex:</b>         |                         |                                         |                                          |                           |                                         |                                           |
| male                | 25.8                    | 25.0                                    | 26.1                                     | 30.7                      | 30.0                                    | 31.0                                      |
| female              | 74.2                    | 75.0                                    | 73.9                                     | 69.3                      | 70.0                                    | 69.0                                      |
| <b>age:</b>         |                         |                                         |                                          |                           |                                         |                                           |
| Up to 20 years      | 38.6                    | 39.7                                    | 38.6                                     | 40.0                      | 40.0                                    | 40.0                                      |
| 21-25 years         | 34.1                    | 33.8                                    | 34.1                                     | 34.0                      | 34.0                                    | 34.0                                      |
| 26-30 years         | 18.2                    | 17.6                                    | 18.2                                     | 18.0                      | 18.0                                    | 18.0                                      |
| 31-35 years         | 6.8                     | 5.9                                     | 6.8                                      | 6.0                       | 6.0                                     | 6.0                                       |
| Older than 35 years | 2.3                     | 2.9                                     | 2.3                                      | 2.0                       | 2.0                                     | 2.0                                       |

### Distress, depression and anxiety

Overall, high levels of distress, anxiety and depression were found in both dental and medical students. Compared to a German reference sample [41] with an overall mean PHQ-4 score of 1.8 (SD=2.0) and of 1.5 (SD=2.0) for a student subsample, our samples reported on average significantly higher anxiety and depression (PHQ-4) scores at t1 and t2: In May 2020 79.5% of the dental students and 86.4% of the medical students reported moderate or severe distress scores and 25.0% of the dental students and 23.8% of the medical students reported moderate to severe anxiety and depression scores. In July

1  
2  
3 2020 dental students reported significantly higher levels of distress and anxiety than medical students  
4 (Table 2). With regard to gender differences, the scores of male and female students did overall not  
5 differ significantly in the whole sample at t1 and t2. However, female dental students (t1: M=4.7;  
6 SD=2.6; t2: M=4.6; SD=2.8) reported significantly higher PHQ-4 scores than male dental students (t1:  
7 M=2.8; SD= 1.5; t2: M=2.9; SD= 2.6) at t1 ( $t(42) = -2.2, p = .031$ ) and t2 ( $t(48) = -2.1, p = .043$ ).  
8  
9

10  
11  
12 In July 2020 (t2), dental students reported significantly higher scores of distress and anxiety than  
13 medical students, while both groups were comparable with regard to their overall anxiety and  
14 depression symptom burden (24.0% with moderate or severe symptoms in dental students, 19.0% in  
15 medical students). With regard to self-perceived stress (only assessed in the second survey), dental  
16 students reported higher stress levels than medical students (Table 2).  
17  
18  
19  
20  
21  
22  
23  
24  
25  
26  
27  
28  
29  
30  
31  
32  
33  
34  
35  
36  
37  
38  
39  
40  
41  
42  
43  
44  
45  
46  
47  
48  
49  
50  
51  
52  
53  
54  
55  
56  
57  
58  
59  
60

**Table 2:** Amount of self-reported distress, depression and anxiety and stress among dental and medical students in May 2020 (n<sup>1</sup>=132) and July 2020 (n<sup>2</sup>=150)

|                                                   | May 2020     |                        |                         |                  |     |      | July 2020    |                        |                          |                  |     |       |
|---------------------------------------------------|--------------|------------------------|-------------------------|------------------|-----|------|--------------|------------------------|--------------------------|------------------|-----|-------|
|                                                   | Whole sample | Dental students (n=44) | Medical students (n=88) | t                | df  | p    | Whole sample | Dental students (n=50) | Medical students (n=100) | t                | df  | p     |
|                                                   | M (SD)       | M (SD)                 | M (SD)                  |                  |     |      | M (SD)       | M (SD)                 | M (SD)                   |                  |     |       |
| <b>Distress (range: 0-10)</b>                     | 6.4<br>(2.4) | 6.3<br>(2.5)           | 6.5<br>(2.4)            | 0.31             | 130 | .757 | 6.1<br>(2.2) | 7.0<br>(2.3)           | 5.7<br>(2.1)             | -3.57            | 148 | <.001 |
| <b>Anxiety and depression (PHQ-4; range 0-12)</b> | 3.9<br>(2.5) | 4.2<br>(2.5)           | 3.8<br>(2.5)            | 0.82             | 130 | .417 | 3.7<br>(2.7) | 4.1<br>(2.8)           | 3.6<br>(2.6)             | 1.13             | 148 | .262  |
| <b>Anxiety (GAD-2; range 0-6)</b>                 | 1.9<br>(1.5) | 2.1<br>(1.5)           | 1.9<br>(1.5)            | 0.79             | 130 | .435 | 1.9<br>(1.6) | 2.3<br>(1.8)           | 1.7<br>(1.4)             | 2.03             | 148 | .045  |
| <b>Depression (PHQ-2; range 0-6)</b>              | 2.0<br>(1.3) | 2.1<br>(1.3)           | 1.9<br>(1.3)            | 0.66             | 130 | .513 | 1.8<br>(1.4) | 1.8<br>(1.3)           | 1.8<br>(1.4)             | -0.13            | 148 | .898  |
| <b>Self-perceived Stress (PSS-4; range 0-16)</b>  | -            | -                      | -                       | -                | -   | -    | 5.6<br>(3.1) | 6.1<br>(3.2)           | 5.3<br>(2.9)             | 1.53             | 148 | .128  |
| <b>Anxiety and depression symptoms (PHQ4)</b>     | %            | %                      | %                       | chi <sup>2</sup> | df  | p    | %            | %                      | %                        | chi <sup>2</sup> | df  | p     |
| <b>normal (0-2)</b>                               | 31.8         | 25.0                   | 35.2                    | 1.54             | 3   | .674 | 38.0         | 36.0                   | 39.0                     | 0.56             | 3   | .906  |
| <b>mild (3-5)</b>                                 | 43.9         | 50.0                   | 40.9                    |                  |     |      | 41.3         | 40.0                   | 42.0                     |                  |     |       |
| <b>moderate (6-8)</b>                             | 19.7         | 20.5                   | 19.3                    |                  |     |      | 13.3         | 16.0                   | 12.0                     |                  |     |       |
| <b>severe (9-12)</b>                              | 4.5          | 4.5                    | 4.5                     |                  |     |      | 7.3          | 8.0                    | 7.0                      |                  |     |       |
| <b>Distress by category</b>                       | %            | %                      | %                       | chi <sup>2</sup> | df  | p    | %            | %                      | %                        | chi <sup>2</sup> | df  | p     |
| <b>Normal (0-4)</b>                               | 15.9         | 20.5                   | 13.6                    | 1.02             | 2   | .600 | 22.7         | 16.0                   | 26.0                     | 9.65             | 2   | .008  |
| <b>Moderate (5-7)</b>                             | 50.8         | 47.7                   | 52.3                    |                  |     |      | 49.3         | 40.0                   | 54.0                     |                  |     |       |
| <b>Severe (8-10)</b>                              | 33.3         | 31.8                   | 34.1                    |                  |     |      | 28.0         | 44.0                   | 20.0                     |                  |     |       |
| <b>Over cutoff (≥5)</b>                           | 84.1         | 79.5                   | 86.4                    | 1.02             | 1   | .313 | 77.3         | 84.0                   | 74.0                     | 1.90             | 1   | .168  |

Note. n=number; M = mean; SD = standard deviation; df = degrees of freedom; p = p-value, significance level p<.05

### Changes in mental health and perception of the study situation

Overall, about one third of the students (36.4% dental students vs. 29.5% medical students) reported that their mental health had worsened because of the pandemic at t1. Likewise, a total of 35.6% (45.5% dental vs. 30.7% medical students) reported a decrease in their study motivation at t1 and 36.7% at t2 (36.0% dental vs. 37.0% medical students). With regard to worries about the current study situation more medical students (t1: 46.4%; t2: 47.5%) than dental students (t1: 31.8%; t2: 34.7%) reported to be unperturbed and slightly more dental than medical students were seriously worried at t1 (18.2% vs. 6.0%) and at t2 (14.3% vs. 10.1%). However, in both surveys dental and medical students did not differ statistically significant regarding their self-reported changes of mental health, study motivation or worries about the current study situation (Table 3). Likewise, we did not find statistically significant differences between male and female students.



**Table 3:** Perception of current study situation, changes of self-reported mental health caused by the COVID-19 pandemic and changes of study motivation of dental and medical students in May 2020 (n<sup>1</sup>=132) and July 2020 (n<sup>2</sup>=150)

| May 2020                                                                                |                          |                        |                            |                  |      |      | July 2020                |                                        |                                          |                        |           |             |
|-----------------------------------------------------------------------------------------|--------------------------|------------------------|----------------------------|------------------|------|------|--------------------------|----------------------------------------|------------------------------------------|------------------------|-----------|-------------|
| Worries about current study situation                                                   | Whole sample (129<n<132) | Dental students (n=44) | Medical students (84<n>88) | chi <sup>2</sup> | df   | p    | Whole sample (148<n<150) | Dental students (49<n>50)              | Medical students (99<n>100)              | chi <sup>2</sup>       | df        | p           |
|                                                                                         | %                        | %                      | %                          |                  |      |      | %                        | %                                      | %                                        |                        |           |             |
| Not worried                                                                             | 41.4                     | 31.8                   | 46.4                       | 5.77             | 2    | .056 | 43.2                     | 34.7                                   | 47.5                                     | 2.27                   | 2         | .321        |
| Somewhat worried                                                                        | 48.4                     | 50.0                   | 47.6                       |                  |      |      | 45.3                     | 51.0                                   | 42.4                                     |                        |           |             |
| Seriously worried                                                                       | 10.2                     | 18.2                   | 6.0                        |                  |      |      | 11.5                     | 14.3                                   | 10.1                                     |                        |           |             |
| <b>Self-reported changes of mental health caused by the COVID-19 pandemic</b>           |                          |                        |                            |                  |      |      |                          |                                        |                                          |                        |           |             |
| improved                                                                                | 19.7                     | 22.7                   | 18.2                       | 1.52             | 2    | .468 | Not asked.               |                                        |                                          |                        |           |             |
| unchanged                                                                               | 48.5                     | 40.9                   | 52.3                       |                  |      |      |                          |                                        |                                          |                        |           |             |
| worsened                                                                                | 31.8                     | 36.4                   | 29.5                       |                  |      |      |                          |                                        |                                          |                        |           |             |
| <b>Self-reported changes of study motivation</b>                                        |                          |                        |                            |                  |      |      |                          |                                        |                                          |                        |           |             |
| increased                                                                               | 13.6                     | 11.4                   | 14.8                       | 2.79             | 2    | .247 | 16.0                     | 16.0                                   | 16.0                                     | 0.02                   | 2         | .992        |
| unchanged                                                                               | 50.8                     | 43.2                   | 54.5                       |                  |      |      | 47.3                     | 48.0                                   | 47.0                                     |                        |           |             |
| decreased                                                                               | 35.6                     | 45.5                   | 30.7                       |                  |      |      | 36.7                     | 36.0                                   | 37.0                                     |                        |           |             |
| <b>Burdening aspects<sup>1</sup></b>                                                    | Not asked                |                        |                            |                  |      |      | <b>Whole sample</b>      | <b>Dental students (49&lt;n&gt;50)</b> | <b>Medical students (99&lt;n&gt;100)</b> | <b>chi<sup>2</sup></b> | <b>df</b> | <b>p</b>    |
| Preparation for (final) exams                                                           | -                        | -                      | -                          | -                | -    | -    | 63.3                     | 76.0                                   | 57.0                                     | 5.18                   | 1         | <b>.023</b> |
| Lack of practical training                                                              | -                        | -                      | -                          |                  |      |      | 43.3                     | 52.0                                   | 39.0                                     | 2.29                   | 1         | .130        |
| Few social contacts (private)                                                           | -                        | -                      | -                          |                  |      |      | 43.3                     | 34.0                                   | 48.0                                     | 2.66                   | 1         | .103        |
| Lack of interaction with fellow students                                                | -                        | -                      | -                          |                  |      |      | 56.0                     | 52.0                                   | 58.0                                     | 0.49                   | 1         | .485        |
| Concomitants of the CoViD-19 pandemic (contact restrictions, mandatory facemasks, etc.) | -                        | -                      | -                          |                  |      |      | 22.0                     | 24.0                                   | 21.0                                     | 0.18                   | 1         | .676        |
| General uncertainty                                                                     | -                        | -                      | -                          | 36.0             | 54.0 | 27.0 | 10.55                    | 1                                      | <b>.001</b>                              |                        |           |             |

1  
2  
3 Note: n=number; M = mean; SD = standard deviation; df = degrees of freedom;  $p$  =  $p$ -value, significance level  $p < .05$

4 <sup>1</sup>dichotomized: burdened (s. Table above) including “somewhat burdensome” and “very burdensome” vs. not burdened including “not at all burdensome” and  
5 “a little burdensome”  
6  
7  
8  
9  
10  
11  
12  
13  
14  
15  
16  
17  
18  
19  
20  
21  
22  
23  
24  
25  
26  
27  
28  
29  
30  
31  
32  
33  
34  
35  
36  
37  
38  
39  
40  
41  
42  
43  
44  
45  
46

For peer review only

### Burdening aspects

Many of students felt burdened due to the lack of interaction with fellow students. In comparison to medical students, significantly more dental students stated that they were burdened with regard to the exams and the general uncertainty (Table 3).

Binary logistic regression indicated that dental students (OR: 4.0; CI (95%): 1.1 – 14.2) were significantly more likely to experience serious worries regarding the current study situation during COVID-19 than medical students in May 2020. In July 2020 higher distress (OR: 1.8; CI (95%): 1.3 – 2.5) was associated with a higher likelihood for reporting serious worries regarding the current study situation during COVID-19 (Table 4).

**Table 4:** Binary logistic regression models on the association of study subject, depression and distress with serious worries in dental and medical students during the COVID-19 pandemic.

| May 2020                    | Odds ratio (OR) | 95% confidence interval (CI) | <i>p</i>    | effect size <sup>1</sup> |
|-----------------------------|-----------------|------------------------------|-------------|--------------------------|
| Subject of study            |                 |                              |             |                          |
| dental                      | 4.0             |                              | n.a.        | .032                     |
| medical                     | Reference       | 1.1 – 14.2                   | <b>.031</b> |                          |
| Distress (DT)               | 1.4             | 0.9 -1.9                     | .078        |                          |
| Depression symptoms (PHQ-2) | 1.5             | 0.9 - 2.6                    | .091        |                          |
| <b>July 2020</b>            |                 |                              |             |                          |
| Distress (DT)               | 1.8             | 1.3 – 2.5                    | <b>.001</b> | 0.24                     |

<sup>1</sup>According to Cohen's guidelines (1988) we considered  $f^2 = .02$  to be a small effect,  $f^2 = .15$  as a medium effect, and  $f^2 = .35$  as a large effect.

### Current concerns and helpful aspects

A total of 52 students (39.4%) provided optional free-text responses regarding the question "What is currently occupying you most in your current study situation?". We identified five categories in a multistage inductive process. The most frequent categories were "difficulties with self-regulated learning and self-motivation", followed by "study-related worries and uncertainty", "lack of feedback from other students and lecturers" and "lack of practical training". Significantly more dental (20.5%) than medical students (4.5%) reported concerns about the lack of practical training ( $\chi^2 = 8.4$ ;  $df = 1$ ;  $p = .004$ ) (Table 5).

**Table 5:** Categories, examples and quantified responses by category for the questions “What is currently occupying you most in your current study situation?” in May 2020 (n=132)

| What is currently occupying you most?                                                                                                                                                            |                                                                                                                                                                                                                                                                                                                                                                                                                                                                                               | Whole sample (n=132) mentioned | Dental students (n=44) mentioned | Medical students (n=88) mentioned |                  |    |      |
|--------------------------------------------------------------------------------------------------------------------------------------------------------------------------------------------------|-----------------------------------------------------------------------------------------------------------------------------------------------------------------------------------------------------------------------------------------------------------------------------------------------------------------------------------------------------------------------------------------------------------------------------------------------------------------------------------------------|--------------------------------|----------------------------------|-----------------------------------|------------------|----|------|
| Category and subcategory                                                                                                                                                                         | Example                                                                                                                                                                                                                                                                                                                                                                                                                                                                                       | %                              | %                                | %                                 | Chi <sup>2</sup> | df | p    |
| <b>Difficulties with self-regulated learning</b><br>(n = 20; 15.2%)<br><ul style="list-style-type: none"> <li>• Self-Motivation</li> <li>• Difficulties with new learning environment</li> </ul> | <p>"Self-motivation- the exchange with fellow students and lecturers is missing, and therefore one has to motivate oneself every day anew to sit down at home (the library as a room for studying is also missing) and to motivate oneself to nevertheless 'attend' all study courses in time and to catch up on the study-work."</p> <p>"Since I don't have the proper learning environment at home, I found it difficult to learn the very extensive content in an appropriate manner."</p> | 15.2                           | 15.9                             | 14.8                              | 0.03             | 1  | .864 |
| <b>Study-related worries and uncertainty</b><br>(n = 19; 14.4%)<br><ul style="list-style-type: none"> <li>• Concerns to perform worse/ to fail</li> <li>• Study-related uncertainty</li> </ul>   | <p>"Extreme pressure to teach myself the mass of content in a short time through e-learning in order to succeed on the exam."</p> <p>"The uncertainty of if and when face-to-face classes can be held again, and if potentially my study time will be extended due to this pandemic."</p>                                                                                                                                                                                                     | 14.4                           | 20.5                             | 11.4                              | 1.97             | 1  | .161 |

|                                                                              |                                                                                                            |      |      |      |      |   |             |
|------------------------------------------------------------------------------|------------------------------------------------------------------------------------------------------------|------|------|------|------|---|-------------|
| <b>Lack of feedback from other students and lecturers</b><br>(n = 15; 11.4%) | "Due to the online format, the exchange with fellow students and the lecturers is missing. (...)."<br>     | 11.4 | 11.4 | 11.4 | 0.00 | 1 | 1.000       |
| <b>Lack of practical training</b><br>(n = 13; 9.8%)                          | "The practical components in dental education are essential and (...) are now being cancelled. (...)."<br> | 9.8  | 20.5 | 4.5  | 8.36 | 1 | <b>.004</b> |
| <b>Other</b><br>(n = 9; 6.8%)                                                | "Lack of available childcare. Learning with (...) children at home is a challenge."<br>                    | 6.8  | 11.4 | 4.5  | 2.15 | 1 | .143        |

Note: n=number; df = degrees of freedom; p = p-value, significance level p<.05

For peer review only

1  
2  
3  
4  
5  
6  
7  
8  
9  
10  
11  
12  
13  
14  
15  
16  
17  
18  
19  
20  
21  
22  
23  
24  
25  
26  
27  
28  
29  
30  
31  
32  
33  
34  
35  
36  
37  
38  
39  
40  
41  
42  
43  
44  
45  
46

1  
2  
3 Furthermore, 53 students (40.2%) completed optional free-text responses to the question "What do  
4 you currently experience as particularly helpful?". Again five categories were identified through a  
5 multi-step inductive process. The most common categories were "Exchange with other students and  
6 lecturers", followed by "flexibility due to online lessons", "self-regulation, -motivation and -  
7 structuring", and "balance through sports and leisure". Dental and medical students did not differ  
8 significantly in their answers with regard to helpful aspects (Table 6).  
9  
10  
11  
12  
13  
14  
15  
16  
17  
18  
19  
20  
21  
22  
23  
24  
25  
26  
27  
28  
29  
30  
31  
32  
33  
34  
35  
36  
37  
38  
39  
40  
41  
42  
43  
44  
45  
46  
47  
48  
49  
50  
51  
52  
53  
54  
55  
56  
57  
58  
59  
60

**Table 6:** Categories, examples and quantified responses by category for the questions “What do you currently experience as particularly helpful?” in May 2020 (n=132)

| What do you currently experience as particularly helpful?      |                                                                                                                                                                                | Whole sample<br>(n=132)<br>mentioned | Dental students<br>(n=44)<br>mentioned | Medical students<br>(n=88)<br>mentioned |                  |    |          |
|----------------------------------------------------------------|--------------------------------------------------------------------------------------------------------------------------------------------------------------------------------|--------------------------------------|----------------------------------------|-----------------------------------------|------------------|----|----------|
| Category                                                       | Example                                                                                                                                                                        | %                                    | %                                      | %                                       | Chi <sup>2</sup> | df | <i>p</i> |
| <b>Exchange with students and lecturers</b><br>(n = 18; 13.6%) | "Intensive exchange with fellow students and lecturers."                                                                                                                       | 13.6                                 | 15.9                                   | 12.5                                    | 0.29             | 1  | .591     |
| <b>Flexibility due to online lessons</b><br>(n = 17; 12.9%)    | "The online semester also brings many advantages. You can arrange everything yourself and work at your own pace. This also takes away a lot of stress for me personally (...)" | 12.9                                 | 15.9                                   | 11.4                                    | 0.54             | 1  | .462     |
| <b>Structure and self-discipline</b><br>(n = 13; 9.8%)         | "Studying online to regain routine in everyday life."                                                                                                                          | 9.8                                  | 11.4                                   | 9.1                                     | 0.17             | 1  | .680     |
| <b>Balance through sports and leisure</b><br>(n = 11; 8.3%)    | "The fact that I can do my team sports again, that gives me enough variety and distraction "                                                                                   | 8.3                                  | 11.4                                   | 6.8                                     | 0.79             | 1  | .373     |
| <b>Other</b><br>(n = 9; 6.8%)                                  | "Encouragement of friends and family"                                                                                                                                          | 6.8                                  | 9.1                                    | 5.7                                     | 0.54             | 1  | .464     |

Note: n=number; df = degrees of freedom; *p* = *p*-value, significance level *p*<.05

1  
2  
3  
4  
5  
6  
7  
8  
9  
10  
11  
12  
13  
14  
15  
16  
17  
18  
19  
20  
21  
22  
23  
24  
25  
26  
27  
28  
29  
30  
31  
32  
33  
34  
35  
36  
37  
38  
39  
40  
41  
42  
43  
44  
45  
46

For peer review only



## DISCUSSION

This study investigated the mental burden and study situation among undergraduate dental and medical students after the initial stage of the COVID-19 pandemic from May 2020 to July 2020. In line with previous studies conducted before the pandemic dental and medical students reported high levels of distress, anxiety and depression[8, 12, 42]. Compared to the norm population students of both professions reported significantly higher levels of anxiety and depression, consistent with findings of other studies[8, 43]. In light of the COVID-19 pandemic, the presence of additional pandemic specific stressors is likely[22]. A recent study showed that for most students isolation from student social networks is associated with increased anxiety levels[24]. According to our qualitative data, the lack of direct contact with fellow students, which could only take place via online media, affects both student professions negatively. These findings complement a recent empirical study in which undergraduate medical students reported lack of interactions with peers, faculty, and patients in practice as negative aspects of digital teaching[44]. For dental students, the lack of practical training played a major role, as dentists usually take dental courses from the first semester onwards to learn the practical skills from early stage on[45]. In comparison, this issue does not yet affect medical students as much in the early stages of their studies, as the undergraduate medical curriculum in Germany includes fewer practical training during this time[46]. In sum this probably accounts for our findings that reported levels of anxiety and depression are even higher than among students of the same medical school prior to the Corona pandemic[8].

With regard to the study situation, medical and in particular dental students were concerned about their current study situation. This trend continued in the further course of the pandemic. These results corroborate recent findings in a representative sample in Austria with a notable decline in mental health during the pandemic[47].

In line with the findings of Stangvaltaite-Mouhat et al. (2020) female dental students showed more pronounced anxiety symptoms than male dental students in our study[11]. This underlines that mental burden may be higher among female students in general[48]. Recent studies also suggest that women are particular burdened during the COVID-19 pandemic[47, 49, 50, 51, 52]. Furthermore several studies showed that certain age groups, including individuals between 18 and 25 years old - the most common age group in students - suffered more from mental distress[47, 49, 51, 53]. Qiu et al. (2020) suspect social media to be one of the causes[49]. Previous research seems to confirm this hypothesis as younger people tend to receive a large amount of information via social media, which can easily trigger stress[54]. The easy accessibility and constant presence of pandemic information may lead to an increase in the duration of information consumption. This increasing duration reinforces the potential negative influence on mental health[55]. A noteworthy finding is that dental students

1  
2  
3 reported increased levels of distress, anxiety and more worries in the second survey whereas medical  
4 students' scores were slightly lower at the second survey.  
5

6  
7 There are some limitations of our study. The cross-sectional surveys at two different times do not allow  
8 causal statements about longitudinal developments. Another limitation is the univariate nature of the  
9 analysis conducted. The univariate model is less comprehensive compared to multivariate models and  
10 does not consider the potential influence of other factors. The small sample size limits  
11 representativeness. However, due to the high response rates (65-87% in the first and 81-82% in the  
12 second survey) one may assume that a majority of the respondents participated in both surveys. Thus,  
13 these single-institutional and cross-sectional surveys achieve a high level of comparability and  
14 representativeness. Still there was a considerable proportion of students that did not participate in the  
15 surveys, which might lead to a volunteer bias[56]. Nonvolunteers may encompass students who suffer  
16 from high levels of distress, anxiety and/or depression. Thus some of the parameters reported in the  
17 study may be underestimating the true burden.  
18  
19

20  
21 Furthermore, no comparisons can be made with the situation before the outbreak of the pandemic,  
22 among the same population. Nevertheless, the study by Heinen et al. (2017) conducted at the same  
23 medical school with the same measures serves as a valid context to frame our findings[8].  
24  
25

26  
27 Considering the worsened levels of psychological distress among students during the COVID-19  
28 pandemic [57, 58] academic institutions should provide timely services in terms of tailored  
29 interventions, which address the specific worries of dental and medical students. Other authors  
30 already provided valuable and concrete recommendations how to reduce the impact of COVID-19 on  
31 student-athlete mental health [59, 60]. Grubic et al. (2021) proposed a framework to manage student-  
32 athlete mental health during the pandemic including "goal setting/motivation" and "support  
33 system/social network" as potential positive influencers. These aspects could be addressed by medical  
34 schools in the form of mentoring. Mentoring was identified as valuable intervention for undergraduate  
35 medical students due to its association with improved emotional well-being of students before the  
36 pandemic[61]. During the pandemic a novel near-peer mentoring intervention via social media was  
37 reported with promising first results[62]. Thus, the implementation of mentoring at medical schools  
38 or the transfer of existing mentoring interventions digital formats might help to reduce the negative  
39 impact of the COVID-19 pandemic on dental and medical students. At the same time longitudinal  
40 research is needed to monitor the mental health of students during the pandemic and after as well as  
41 rigor evaluation of all interventions.  
42  
43  
44  
45  
46  
47  
48  
49  
50  
51  
52  
53  
54  
55

## 56 57 Conclusion

58  
59 Overall students of medicine and dentistry are particularly affected by high mental distress and burden  
60 due to the demanding contents and structure of their studies. It is likely that the concomitant

1  
2  
3 symptoms of the pandemic have an additional negative impact on the levels of stress, anxiety and  
4 depression of the students.  
5

6  
7 Especially dental students reported higher levels of burden which might be associated with the high  
8 practical content early in their studies. The increase in anxiety levels of dental students might be  
9 associated with the duration of the restrictions of especially the practical content during the  
10 undergraduate study. Against this background, further monitoring of both dental and medical students  
11 during the pandemic would be important in order to develop and introduce tailored prevention  
12 concepts adapted to the specific study situation.  
13  
14  
15  
16

17  
18  
19  
20 **Acknowledgements:** We would like to thank all students who participated in the study and the  
21 evaluation team of the faculty who administered the online survey.  
22  
23

24  
25  
26 **Author contributions:** JG designed the study and contributed to the analysis and interpretation of the  
27 data. She critically revised the manuscript during the internal revision process and wrote continuing  
28 drafts as well as the final draft of the manuscript. ASW analyzed the data and contributed to the  
29 interpretation of the data. She wrote the first draft of the manuscript and critically revised the  
30 manuscript during the internal revision process. IH contributed to the analysis and interpretation of  
31 the data. She was involved in drafting the article and critically revised the manuscript during the  
32 internal revision process. CB designed the study, analyzed the data and contributed to the  
33 interpretation of the data. She wrote the first draft of the manuscript and critically revised the  
34 manuscript during the internal revision process. All authors gave their final approval of the version to  
35 be published and agree to be accountable for all aspects of the work in ensuring that questions related  
36 to the accuracy or integrity of any part of the work are appropriately investigated and resolved.  
37  
38  
39  
40  
41  
42  
43  
44

45  
46 **Funding:** This research received no specific grant from any funding agency in the public, commercial  
47 or not-for-profit sectors  
48

49  
50 **Competing interests:** The authors declare that they have no competing interests.  
51

52 **Patient consent form:** Not required.  
53

54  
55 **Ethics approval:** Institutional ethical approval was obtained from the local ethics board of the Center  
56 for Psychosocial Medicine at the University Medical Center Hamburg-Eppendorf, approval number  
57 LPEK-0161, prior to commencement of this research. Only students who provided informed consent  
58 were able to participate in the study.  
59  
60

**Data availability statement:** As ethical approval was not obtained to make data sharing possible outside of the listed research team, no additional data are available.

## References

1. Vindegaard N, Benros ME. COVID-19 pandemic and mental health consequences: Systematic review of the current evidence. *Brain Behav Immun* 2020;89:531-42.
2. Empfehlungen II der Deutschen Hochschulmedizin zum Studium der Humanmedizin und Zahnmedizin während der aktuellen COVID-19-Pandemie, 18.03.2020.: Verband der Universitätsklinika Deutschlands und MFT Medizinischer Fakultätentag; 2020. [https://www.uniklinika.de/fileadmin/user\\_upload/Covid-19-Empfehlungen\\_DHM\\_zum\\_Medizinstudium\\_2020-03-18.pdf](https://www.uniklinika.de/fileadmin/user_upload/Covid-19-Empfehlungen_DHM_zum_Medizinstudium_2020-03-18.pdf) (accessed 8 Jun 2020).
3. Whelan A, Prescott J, Young G, Catanese VM. Guidance on Medical Students' Clinical Participation: Effective Immediately.: Association of American Academic Colleges.; 2020 [updated March 17, 2020]. <https://lcme.org/wp-content/uploads/filebase/March-17-2020-Guidance-on-Medical-Students-Clinical-Participation.pdf>. (accessed 8 Jun 2020).
4. Guse J, Heinen I, Kurre J, Mohr S, Bergelt C. Perception of the study situation and mental burden during the COVID-19 pandemic among undergraduate medical students with and without mentoring. *GMS J Med Educ* 2020;37(7):Doc72.
5. Miller DG, Pierson L, Doernberg S. The Role of Medical Students During the COVID-19 Pandemic. *Ann Intern Med*. 2020; Menon A, Klein EJ, Kollars K, Kleinhenz ALW. Medical Students Are Not Essential Workers: Examining Institutional Responsibility During the COVID-19 Pandemic. *Acad Med* 2020;95(8):1149-51.
6. Schwenk TL, Davis L, Wimsatt LA. Depression, stigma, and suicidal ideation in medical students. *JAMA*. 2010;304(11):1181-90; Bacchi S, Licinio J. Resilience and Psychological Distress in Psychology and Medical Students. *Acad Psychiatry* 2017;41(2):185-8.
7. Hope V, Henderson M. Medical student depression, anxiety and distress outside North America: a systematic review. *Med Educ* 2014;48(10):963-79.
8. Heinen I, Bullinger M, Kocalevent RD. Perceived stress in first year medical students - associations with personal resources and emotional distress. *BMC Med Educ* 2017;17(1):4.
9. Knipe D, Maughan C, Gilbert J, Dymock D, Moran P, Gunnell D. Mental health in medical, dentistry and veterinary students: cross-sectional online survey. *BJPsych Open* 2018;4(6):441-6.
10. Puthran R, Zhang MW, Tam WW, Ho RC. Prevalence of depression amongst medical students: a meta-analysis. *Med Educ* 2016;50(4):456-68.

11. Stangvaltaite-Mouhat L, Puriene A, Chalas R et al. Self-reported psychological problems amongst undergraduate dental students: A pilot study in seven European countries. *Eur J Dent Educ* 2020;24(2):341-50.
12. Basudan S, Binanzan N, Alhassan A. Depression, anxiety and stress in dental students. *Int J Med Educ* 2017;8:179-86.
13. Bathla M, Singh M, Kulhara P et al. Evaluation of anxiety, depression and suicidal intent in undergraduate dental students: A cross-sectional study. *Contemp Clin Dent* 2015;6(2):215-22.
14. Jurkat H, Hofer S, Richter L et al. [Quality of life, stress management and health promotion in medical and dental students. A comparative study]. *Dtsch Med Wochenschr* 2011;136(23):1245-50.
15. Harris RC, Millichamp CJ, Thomson WM. Stress and coping in fourth-year medical and dental students. *N Z Dent J* 2015;111(3):102-8.
16. Astill S, Ricketts N, Singh LA et al. Environmental and perceived stress in Australian dental undergraduates: Preliminary outcomes. *J Dent Res Dent Clin Dent Prospects* 2016;10(4):270-9.
17. Petzold MB, Plag J, Ströhle A. Dealing with psychological distress by healthcare professionals during the COVID-19 pandemic. *Der Nervenarzt* 2020;91(5):417-21.
18. Hawryluck L, Gold WL, Robinson S et al. SARS control and psychological effects of quarantine, Toronto, Canada. *Emerg Infect Dis* 2004;10(7):1206-12.
19. Wang C, Pan R, Wan X et al. Immediate Psychological Responses and Associated Factors during the Initial Stage of the 2019 Coronavirus Disease (COVID-19) Epidemic among the General Population in China. *Int J Environ Res Public Health* 2020;17(5).
20. Lai J, Ma S, Wang Y et al. Factors Associated With Mental Health Outcomes Among Health Care Workers Exposed to Coronavirus Disease 2019. *JAMA Netw Open*. 2020;3(3):e203976.
21. Bao Y, Sun Y, Meng S et al. 2019-nCoV epidemic: address mental health care to empower society. *Lancet* 2020;395(10224):e37-e8.
22. Inter-Agency Standing Committee (IASC). IASC Guidance on Operational considerations for Multisectoral Mental Health and Psychosocial Support Programmes during the COVID-19 Pandemic IASC Guidance on Operational considerations for Multisectoral MHPSS Programmes during the COVID-19 Pandemic.pdf [updated 25 Jun 2020] (accessed 18 Mar 2020).
23. Odriozola-González P, Planchuelo-Gómez Á, Irurtia MJ et al. Psychological effects of the COVID-19 outbreak and lockdown among students and workers of a Spanish university. *Psychiatry Research* 2020;290:113108.
24. Elmer T, Mepham K, Stadtfeld C. Students under lockdown: Comparisons of students' social networks and mental health before and during the COVID-19 crisis in Switzerland. *PLoS One* 2020;15(7):e0236337.

- 1  
2  
3 25. Li Y, Wang Y, Jiang J et al. Psychological distress among health professional students during the COVID-  
4 19 outbreak. *Psychological Medicine* 2020;1-3.
- 6 26. O'Byrne L, Gavin B, McNicholas F. Medical students and COVID-19: the need for pandemic  
7 preparedness. *J Med Ethics* 2020;46(9):623-6.
- 9 27. [dataset] Steinmetz, H., Batzdorfer, V., Bosnjak, M. Data from: The ZPID lockdown measures dataset.  
10 ZPID Science Information Online, 20(1). 8 June 2020. <http://dx.doi.org/10.23668/psycharchives.3019>.
- 12 28. <https://www.hrk.de/activities/the-covid-19-pandemic-and-the-german-universities/> [website].  
13 Berlin: HRK German Rectors' Conference (updated 2020 July 28, accessed 29 Jul 2020).
- 15 29. Rose S. Medical Student Education in the Time of COVID-19. *JAMA*. 2020.
- 17 30. Gerhard-Szep S, Güntsch A, Pospiech P et al. Assessment formats in dental medicine: An overview.  
18 *GMS J Med Educ* 2016;33(4):Doc65.
- 19 31. Rheingans A, Soulos A, Mohr S, Meyer J, Guse AH. The Hamburg integrated medical degree program  
20 iMED. *GMS J Med Educ* 2019;36(5):Doc52.
- 22 32. Mehnert A, Müller D, Lehmann C, Koch U. Die deutsche Version des NCCN Distress-Thermometers.  
23 *Zeitschrift für Psychiatrie, Psychologie und Psychotherapie* 2006;54(3):213-23.
- 25 33. Kroenke K, Spitzer RL, Williams JB, Lowe B. An ultra-brief screening scale for anxiety and depression:  
26 the PHQ-4. *Psychosomatics*. 2009;50(6):613-21.
- 28 34. Khubchandani J, Brey R, Kotecki J, Kleinfelder J, Anderson J. The Psychometric Properties of PHQ-4  
29 Depression and Anxiety Screening Scale Among College Students. *Archives of Psychiatric Nursing*  
30 2016;30(4):457-62.
- 32 35. Cohen S, Kamarck T, Mermelstein R. A global measure of perceived stress. *J Health Soc Behav*  
33 1983;24(4):385-96.
- 35 36. Studierende: Deutschland, Semester, Nationalität, Geschlecht, Studienfach [website]. <https://www-genesis.destatis.de/genesis/online?operation=previous&levelindex=1&step=1&titel=Ergebnis&levelid=1616753759559&acceptcookies=false#abreadcrumb> (accessed 26 Mar 2021).
- 37 37. Field A. *Discovering statistics using IBM SPSS statistics : and sex and drugs and rock 'n' roll*. 4. ed. Los  
38 Angeles [i.a.]: Sage; 2013.
- 40 38. Cohen J. *Statistical power analysis for the behavioral sciences*. 2. ed. Hillsdale, NJ [i.a.]: Erlbaum; 1988.
- 42 39. Hsieh HF, Shannon SE. Three approaches to qualitative content analysis. *Qualitative health research*  
43 2005;15(9):1277-88.
- 45 40. Monrouxe LV, Rees CE. When I say ... quantification in qualitative research. *Med Educ* 2020;54(3):186-  
46 7.
- 48 41. Löwe B, Wahl I, Rose M et al. A 4-item measure of depression and anxiety: validation and  
49 standardization of the Patient Health Questionnaire-4 (PHQ-4) in the general population. *J Affect*  
50 *Disord* 2010;122(1-2):86-95.
- 52  
53  
54  
55  
56  
57  
58  
59  
60



- 1  
2  
3 42. Jiménez-Ortiz JL, Islas-Valle RM, Jiménez-Ortiz JD, Pérez-Lizárraga E, Hernández-García ME, González-  
4 Salazar F. Emotional exhaustion, burnout, and perceived stress in dental students. *Journal of*  
5 *International Medical Research* 2019;47(9):4251-9.  
6  
7  
8 43. Stormon N, Ford PJ, Kisely S, Bartle E, Eley DS. Depression, anxiety and stress in a cohort of Australian  
9 dentistry students. *Eur J Dent Educ* 2019;23(4):507-14.  
10  
11 44. Mohr S, Küfe B, Rheingans A, Guse, J. Attitude Towards and Adoption of the Novel Learning  
12 Environment Among Undergraduate Medical Students During COVID-19. *Front Educ* 2021;6:714526.  
13  
14 45. Mekhemar M, Conrad J, Attia S, Dörfer C. Oral Health Attitudes among Preclinical and Clinical Dental  
15 Students in Germany. *International journal of environmental research and public health*  
16 2020;17(12):4253.  
17  
18  
19  
20 46. Chenot JF. Undergraduate medical education in Germany. *Ger Med Sci* 2009;7:Doc02.  
21  
22 47. Dale R, Budimir S, Probst T, Stippl P, Pieh C. Mental Health during the COVID-19 Lockdown over the  
23 Christmas Period in Austria and the Effects of Sociodemographic and Lifestyle Factors. *Int J Environ Res*  
24 *Public Health* 2021;18(7).  
25  
26 48. Dyrbye LN, Thomas MR, Shanafelt TD. Systematic review of depression, anxiety, and other indicators  
27 of psychological distress among U.S. and Canadian medical students. *Acad Med* 2006;81(4):354-73.  
28  
29 49. Qiu J, Shen B, Zhao M, Wang Z, Xie B, Xu Y. A nationwide survey of psychological distress among  
30 Chinese people in the COVID-19 epidemic: implications and policy recommendations. *General*  
31 *psychiatry* 2020;33(2):e100213.  
32  
33  
34 50. Park CL, Russell BS, Fendrich M, Finkelstein-Fox L, Hutchison M, Becker J. Americans' COVID-19 Stress,  
35 Coping, and Adherence to CDC Guidelines. *Journal of general internal medicine* 2020;35(8):2296-303.;  
36  
37 51. Liu N, Zhang F, Wei C, Jia Y, Shang Z, Sun L, et al. Prevalence and predictors of PTSS during COVID-19  
38 outbreak in China hardest-hit areas: Gender differences matter. *Psychiatry Res* 2020;287:112921.  
39  
40  
41 52. Pieh C, Budimir S, Probst T. The effect of age, gender, income, work, and physical activity on mental  
42 health during coronavirus disease (COVID-19) lockdown in Austria (vol 136, 110186, 2020). *J*  
43 *Psychosom Res* 2020;139.  
44  
45  
46 53. Brooks SK, Webster RK, Smith LE et al. The psychological impact of quarantine and how to reduce it:  
47 rapid review of the evidence. *Lancet* 2020;395(10227):912-20.  
48  
49  
50 54. Gabriel R, Röhrs HP. Social Media: Springer Gabler; 2017.  
51  
52 55. Huang Y, Zhao N. Generalized anxiety disorder, depressive symptoms and sleep quality during COVID-  
53 19 outbreak in China: a web-based cross-sectional survey. *Psychiatry Res* 2020;288:112954.  
54  
55  
56 56. Salkind NJ. (2010). Encyclopedia of research design: Thousand Oaks, CA: SAGE Publications; 2010.  
57  
58 57. Cao W, Fang Z, Hou G, Han M, Xu X, Dong J, Zheng J. The psychological impact of the COVID-19 epidemic  
59 on college students in China. *Psychiatry Res.* 2020;287:112934.  
60

- 1  
2  
3 58. Zhang Y, Zhang H, Ma X, Di Q. Mental Health Problems during the COVID-19 Pandemics and the  
4 Mitigation Effects of Exercise: A Longitudinal Study of College Students in China. *Int. J. Environ. Res.*  
5 *Public Health* 2020; 17(10):3722.  
6  
7  
8  
9 59. Grubic N, Badovinac S, Johri AM. Student mental health in the midst of the COVID-19 pandemic: A call  
10 for further research and immediate solutions. *Int J Soc Psychiatry* 2020;66(5):517-518.  
11  
12  
13 60. Grubic N, Jain S, Mihajlovic V, Thornton JS, Johri AM. Competing against COVID-19: have we forgotten  
14 about student-athletes' mental health? *Br J Sports Med* 2021;55(17):950-951.  
15  
16  
17 61. Wasson LT, Cusmano A, Meli L, Louh I, Falzon L, Hampsey M, Young G, Shaffer J, Davidson KW.  
18 Association Between Learning Environment Interventions and Medical Student Well-being: A  
19 Systematic Review. *JAMA*. 2016 Dec 6;316(21):2237-2252.  
20  
21  
22 62. Rastegar Kazerooni A, Amini M, Tabari P, Moosavi M. Peer mentoring for medical students during the  
23 COVID-19 pandemic via a social media platform. *Med Educ* 2020;54(8):762-763.  
24  
25  
26  
27  
28  
29  
30  
31  
32  
33  
34  
35  
36  
37  
38  
39  
40  
41  
42  
43  
44  
45  
46  
47  
48  
49  
50  
51  
52  
53  
54  
55  
56  
57  
58  
59  
60



# Reporting checklist for cross sectional study.

Based on the STROBE cross sectional guidelines.

## Instructions to authors

Complete this checklist by entering the page numbers from your manuscript where readers will find each of the items listed below.

Your article may not currently address all the items on the checklist. Please modify your text to include the missing information. If you are certain that an item does not apply, please write "n/a" and provide a short explanation.

Upload your completed checklist as an extra file when you submit to a journal.

In your methods section, say that you used the STROBE cross sectional reporting guidelines, and cite them as:

von Elm E, Altman DG, Egger M, Pocock SJ, Gøtzsche PC, Vandenbroucke JP. The Strengthening the Reporting of Observational Studies in Epidemiology (STROBE) Statement: guidelines for reporting observational studies.

|                           |                                                                                                        | Page   |
|---------------------------|--------------------------------------------------------------------------------------------------------|--------|
|                           | Reporting Item                                                                                         | Number |
| <b>Title and abstract</b> |                                                                                                        |        |
| Title                     | <a href="#">#1a</a> Indicate the study's design with a commonly used term in the title or the abstract | 1      |

|    |                      |                     |                                                                 |   |
|----|----------------------|---------------------|-----------------------------------------------------------------|---|
| 1  | Abstract             | <a href="#">#1b</a> | Provide in the abstract an informative and balanced summary     | 2 |
| 2  |                      |                     |                                                                 |   |
| 3  |                      |                     |                                                                 |   |
| 4  |                      |                     | of what was done and what was found                             |   |
| 5  |                      |                     |                                                                 |   |
| 6  | <b>Introduction</b>  |                     |                                                                 |   |
| 7  |                      |                     |                                                                 |   |
| 8  |                      |                     |                                                                 |   |
| 9  |                      |                     |                                                                 |   |
| 10 | Background /         | <a href="#">#2</a>  | Explain the scientific background and rationale for the         | 3 |
| 11 | rationale            |                     | investigation being reported                                    |   |
| 12 |                      |                     |                                                                 |   |
| 13 |                      |                     |                                                                 |   |
| 14 |                      |                     |                                                                 |   |
| 15 | Objectives           | <a href="#">#3</a>  | State specific objectives, including any prespecified           | 4 |
| 16 |                      |                     | hypotheses                                                      |   |
| 17 |                      |                     |                                                                 |   |
| 18 |                      |                     |                                                                 |   |
| 19 |                      |                     |                                                                 |   |
| 20 | <b>Methods</b>       |                     |                                                                 |   |
| 21 |                      |                     |                                                                 |   |
| 22 |                      |                     |                                                                 |   |
| 23 | Study design         | <a href="#">#4</a>  | Present key elements of study design early in the paper         | 4 |
| 24 |                      |                     |                                                                 |   |
| 25 |                      |                     |                                                                 |   |
| 26 | Setting              | <a href="#">#5</a>  | Describe the setting, locations, and relevant dates, including  | 4 |
| 27 |                      |                     | periods of recruitment, exposure, follow-up, and data           |   |
| 28 |                      |                     | collection                                                      |   |
| 29 |                      |                     |                                                                 |   |
| 30 |                      |                     |                                                                 |   |
| 31 | Eligibility criteria | <a href="#">#6a</a> | Give the eligibility criteria, and the sources and methods of   | 4 |
| 32 |                      |                     | selection of participants.                                      |   |
| 33 |                      |                     |                                                                 |   |
| 34 |                      |                     |                                                                 |   |
| 35 |                      |                     |                                                                 |   |
| 36 |                      |                     |                                                                 |   |
| 37 |                      |                     |                                                                 |   |
| 38 |                      |                     |                                                                 |   |
| 39 |                      |                     |                                                                 |   |
| 40 |                      | <a href="#">#7</a>  | Clearly define all outcomes, exposures, predictors, potential   | 5 |
| 41 |                      |                     | confounders, and effect modifiers. Give diagnostic criteria, if |   |
| 42 |                      |                     | applicable                                                      |   |
| 43 |                      |                     |                                                                 |   |
| 44 |                      |                     |                                                                 |   |
| 45 |                      |                     |                                                                 |   |
| 46 |                      |                     |                                                                 |   |
| 47 | Data sources /       | <a href="#">#8</a>  | For each variable of interest give sources of data and details  | 5 |
| 48 | measurement          |                     | of methods of assessment (measurement). Describe                |   |
| 49 |                      |                     | comparability of assessment methods if there is more than       |   |
| 50 |                      |                     | one group. Give information separately for for exposed and      |   |
| 51 |                      |                     | unexposed groups if applicable.                                 |   |
| 52 |                      |                     |                                                                 |   |
| 53 |                      |                     |                                                                 |   |
| 54 |                      |                     |                                                                 |   |
| 55 |                      |                     |                                                                 |   |
| 56 |                      |                     |                                                                 |   |
| 57 |                      |                     |                                                                 |   |
| 58 |                      |                     |                                                                 |   |
| 59 |                      |                     |                                                                 |   |
| 60 |                      |                     |                                                                 |   |

|    |                |                      |                                                               |     |
|----|----------------|----------------------|---------------------------------------------------------------|-----|
| 1  | Bias           | <a href="#">#9</a>   | Describe any efforts to address potential sources of bias     | 7   |
| 2  |                |                      |                                                               |     |
| 3  |                |                      |                                                               |     |
| 4  | Study size     | <a href="#">#10</a>  | Explain how the study size was arrived at                     | 4   |
| 5  |                |                      |                                                               |     |
| 6  |                |                      |                                                               |     |
| 7  | Quantitative   | <a href="#">#11</a>  | Explain how quantitative variables were handled in the        | 6   |
| 8  | variables      |                      | analyses. If applicable, describe which groupings were        |     |
| 9  |                |                      | chosen, and why                                               |     |
| 10 |                |                      |                                                               |     |
| 11 |                |                      |                                                               |     |
| 12 |                |                      |                                                               |     |
| 13 |                |                      |                                                               |     |
| 14 |                |                      |                                                               |     |
| 15 | Statistical    | <a href="#">#12a</a> | Describe all statistical methods, including those used to     | 6   |
| 16 | methods        |                      | control for confounding                                       |     |
| 17 |                |                      |                                                               |     |
| 18 |                |                      |                                                               |     |
| 19 |                |                      |                                                               |     |
| 20 | Statistical    | <a href="#">#12b</a> | Describe any methods used to examine subgroups and            | 6   |
| 21 | methods        |                      | interactions                                                  |     |
| 22 |                |                      |                                                               |     |
| 23 |                |                      |                                                               |     |
| 24 |                |                      |                                                               |     |
| 25 |                |                      |                                                               |     |
| 26 | Statistical    | <a href="#">#12c</a> | Explain how missing data were addressed                       | 4   |
| 27 | methods        |                      |                                                               |     |
| 28 |                |                      |                                                               |     |
| 29 |                |                      |                                                               |     |
| 30 |                |                      |                                                               |     |
| 31 | Statistical    | <a href="#">#12d</a> | If applicable, describe analytical methods taking account of  | n/a |
| 32 | methods        |                      | sampling strategy                                             |     |
| 33 |                |                      |                                                               |     |
| 34 |                |                      |                                                               |     |
| 35 |                |                      |                                                               |     |
| 36 | Statistical    | <a href="#">#12e</a> | Describe any sensitivity analyses                             | n/a |
| 37 | methods        |                      |                                                               |     |
| 38 |                |                      |                                                               |     |
| 39 |                |                      |                                                               |     |
| 40 |                |                      |                                                               |     |
| 41 |                |                      |                                                               |     |
| 42 | <b>Results</b> |                      |                                                               |     |
| 43 |                |                      |                                                               |     |
| 44 |                |                      |                                                               |     |
| 45 | Participants   | <a href="#">#13a</a> | Report numbers of individuals at each stage of study—eg       | 7   |
| 46 |                |                      | numbers potentially eligible, examined for eligibility,       |     |
| 47 |                |                      | confirmed eligible, included in the study, completing follow- |     |
| 48 |                |                      | up, and analysed. Give information separately for for         |     |
| 49 |                |                      | exposed and unexposed groups if applicable.                   |     |
| 50 |                |                      |                                                               |     |
| 51 |                |                      |                                                               |     |
| 52 |                |                      |                                                               |     |
| 53 |                |                      |                                                               |     |
| 54 |                |                      |                                                               |     |
| 55 |                |                      |                                                               |     |
| 56 |                |                      |                                                               |     |
| 57 | Participants   | <a href="#">#13b</a> | Give reasons for non-participation at each stage              | n/a |
| 58 |                |                      |                                                               |     |
| 59 |                |                      |                                                               |     |
| 60 |                |                      |                                                               |     |

|    |                   |                      |                                                                   |       |
|----|-------------------|----------------------|-------------------------------------------------------------------|-------|
| 1  | Participants      | <a href="#">#13c</a> | Consider use of a flow diagram                                    | n/a   |
| 2  |                   |                      |                                                                   |       |
| 3  |                   |                      |                                                                   |       |
| 4  | Descriptive data  | <a href="#">#14a</a> | Give characteristics of study participants (eg demographic,       | 7-8   |
| 5  |                   |                      | clinical, social) and information on exposures and potential      |       |
| 6  |                   |                      | confounders. Give information separately for exposed and          |       |
| 7  |                   |                      | unexposed groups if applicable.                                   |       |
| 8  |                   |                      |                                                                   |       |
| 9  |                   |                      |                                                                   |       |
| 10 |                   |                      |                                                                   |       |
| 11 |                   |                      |                                                                   |       |
| 12 |                   |                      |                                                                   |       |
| 13 |                   |                      |                                                                   |       |
| 14 | Descriptive data  | <a href="#">#14b</a> | Indicate number of participants with missing data for each        | 9; 11 |
| 15 |                   |                      | variable of interest                                              |       |
| 16 |                   |                      |                                                                   |       |
| 17 |                   |                      |                                                                   |       |
| 18 |                   |                      |                                                                   |       |
| 19 | Outcome data      | <a href="#">#15</a>  | Report numbers of outcome events or summary measures.             | n/a   |
| 20 |                   |                      | Give information separately for exposed and unexposed             |       |
| 21 |                   |                      | groups if applicable.                                             |       |
| 22 |                   |                      |                                                                   |       |
| 23 |                   |                      |                                                                   |       |
| 24 |                   |                      |                                                                   |       |
| 25 |                   |                      |                                                                   |       |
| 26 |                   |                      |                                                                   |       |
| 27 | Main results      | <a href="#">#16a</a> | Give unadjusted estimates and, if applicable, confounder-         | n/a   |
| 28 |                   |                      | adjusted estimates and their precision (eg, 95% confidence        |       |
| 29 |                   |                      | interval). Make clear which confounders were adjusted for         |       |
| 30 |                   |                      | and why they were included                                        |       |
| 31 |                   |                      |                                                                   |       |
| 32 |                   |                      |                                                                   |       |
| 33 |                   |                      |                                                                   |       |
| 34 |                   |                      |                                                                   |       |
| 35 |                   |                      |                                                                   |       |
| 36 |                   |                      |                                                                   |       |
| 37 | Main results      | <a href="#">#16b</a> | Report category boundaries when continuous variables were         | 9     |
| 38 |                   |                      | categorized                                                       |       |
| 39 |                   |                      |                                                                   |       |
| 40 |                   |                      |                                                                   |       |
| 41 |                   |                      |                                                                   |       |
| 42 | Main results      | <a href="#">#16c</a> | If relevant, consider translating estimates of relative risk into | n/a   |
| 43 |                   |                      | absolute risk for a meaningful time period                        |       |
| 44 |                   |                      |                                                                   |       |
| 45 |                   |                      |                                                                   |       |
| 46 |                   |                      |                                                                   |       |
| 47 |                   |                      |                                                                   |       |
| 48 | Other analyses    | <a href="#">#17</a>  | Report other analyses done—e.g., analyses of subgroups            | n/a   |
| 49 |                   |                      | and interactions, and sensitivity analyses                        |       |
| 50 |                   |                      |                                                                   |       |
| 51 |                   |                      |                                                                   |       |
| 52 |                   |                      |                                                                   |       |
| 53 | <b>Discussion</b> |                      |                                                                   |       |
| 54 |                   |                      |                                                                   |       |
| 55 |                   |                      |                                                                   |       |
| 56 | Key results       | <a href="#">#18</a>  | Summarise key results with reference to study objectives          | 17    |
| 57 |                   |                      |                                                                   |       |
| 58 |                   |                      |                                                                   |       |
| 59 |                   |                      |                                                                   |       |
| 60 |                   |                      |                                                                   |       |

|    |                          |                     |                                                                |    |
|----|--------------------------|---------------------|----------------------------------------------------------------|----|
| 1  | Limitations              | <a href="#">#19</a> | Discuss limitations of the study, taking into account sources  | 18 |
| 2  |                          |                     | of potential bias or imprecision. Discuss both direction and   |    |
| 3  |                          |                     | magnitude of any potential bias.                               |    |
| 4  |                          |                     |                                                                |    |
| 5  |                          |                     |                                                                |    |
| 6  |                          |                     |                                                                |    |
| 7  |                          |                     |                                                                |    |
| 8  |                          |                     |                                                                |    |
| 9  | Interpretation           | <a href="#">#20</a> | Give a cautious overall interpretation considering objectives, | 18 |
| 10 |                          |                     | limitations, multiplicity of analyses, results from similar    |    |
| 11 |                          |                     | studies, and other relevant evidence.                          |    |
| 12 |                          |                     |                                                                |    |
| 13 |                          |                     |                                                                |    |
| 14 |                          |                     |                                                                |    |
| 15 |                          |                     |                                                                |    |
| 16 | Generalisability         | <a href="#">#21</a> | Discuss the generalisability (external validity) of the study  | 18 |
| 17 |                          |                     | results.                                                       |    |
| 18 |                          |                     |                                                                |    |
| 19 |                          |                     |                                                                |    |
| 20 |                          |                     |                                                                |    |
| 21 |                          |                     |                                                                |    |
| 22 | <b>Other Information</b> |                     |                                                                |    |
| 23 |                          |                     |                                                                |    |
| 24 |                          |                     |                                                                |    |
| 25 | Funding                  | <a href="#">#22</a> | Give the source of funding and the role of the funders for the | 18 |
| 26 |                          |                     | present study and, if applicable, for the original study on    |    |
| 27 |                          |                     | which the present article is based                             |    |
| 28 |                          |                     |                                                                |    |
| 29 |                          |                     |                                                                |    |
| 30 |                          |                     |                                                                |    |
| 31 |                          |                     |                                                                |    |
| 32 |                          |                     |                                                                |    |

33 None The STROBE checklist is distributed under the terms of the Creative Commons Attribution  
34 License CC-BY. This checklist can be completed online using <https://www.goodreports.org/>, a tool  
35 made by the [EQUATOR Network](#) in collaboration with [Penelope.ai](#)  
36  
37  
38  
39  
40  
41  
42  
43  
44  
45  
46  
47  
48  
49  
50  
51  
52  
53  
54  
55  
56  
57  
58  
59  
60
